# Supplementary material for: p27Kip1 promotes invadopodia turnover and invasion through the regulation of the PAK1/Cortactin pathway
Source: eLife. 2017 Mar 13;6:e22207. doi: 10.7554/eLife.22207 (PMC5388532; doi:10.7554/eLife.22207)
Supplement: Figure 2—source data 1. — DOI: http://dx.doi.org/10.7554/eLife.22207.005 [file elife-22207-fig2-data1.xlsx]

## Sheet: Fig 2C
Figure 2C : Quantification of coimmunoprecipitation between p27 and Cortactin in MEF E6
			0.1	0"	5"	30"	60"	180"
	Exp #1	Quantification Cortactin	17947	19544	19389	19174	28246	30817
		Quantification p27	25689	14212	21313	23220	22808	20040
		Ratio	0.698626	1.37518	0.909726	0.825754	1.23843	1.53777
		Fold change	0.508027	1	0.661535	0.600471	0.900558	1.11824
	Exp #2	Quantification Cortactin	1417	6977	12104	11120	9210	16577
		Quantification p27	12858	19876	22557	21599	20129	18166
		Ratio	0.110204	0.351026	0.536596	0.514839	0.457549	0.912529
		Fold change	0.313947	1	1.52865	1.46667	1.30346	2.5996
	Exp #3	Quantification Cortactin	21584	21737	19143	14622	75964	21006
		Quantification p27	26073	25979	24280	27881	32421	23094
		Ratio	0.82783	0.836714	0.788427	0.524443	2.34305	0.909587
		Fold change	0.989381	1	0.942289	0.626789	2.8003	1.08709
	Exp #4	Quantification Cortactin	1032	3875	2196	2155	10652	17800
		Quantification p27	23461	34902	35011	36927	27652	22136
		Ratio	0.0439879	0.111025	0.0627231	0.0583584	0.385216	0.80412
		Fold change	0.396198	1	0.564945	0.525632	3.46963	7.24268
	Exp #5	Quantification Cortactin	27098	29015	16199	13151	41735	32923
		Quantification p27	13916	32875	29159	22780	20890	19207
		Ratio	1.94725	0.882586	0.55554	0.577305	1.99785	1.71411
		Fold change	2.20631	1	0.629446	0.654106	2.26363	1.94215
Table Analyzed	Fig 2C
ANOVA summary
F	2.514
P value	0.0576
P value summary	ns
Are differences among means statistically significant? (P < 0.05)	No
R square	0.3437
Brown-Forsythe test
F (DFn, DFd)	1,623 (5, 24)
P value	0.1922
P value summary	ns
Significantly different standard deviations? (P < 0.05)	No
Bartlett's test
Bartlett's statistic (corrected)	+infinity
P value	< 0,0001
P value summary	****
Significantly different standard deviations? (P < 0.05)	Yes
ANOVA table	SS	DF	MS	F (DFn, DFd)	P value
Treatment (between columns)	17.94	5	3.588	F (5, 24) = 2,514	P = 0,0576
Residual (within columns)	34.25	24	1.427
Total	52.19	29
Data summary
Number of treatments (columns)	6
Number of values (total)	30
Number of families	1
Number of comparisons per family	5
Alpha	0.05
Bonferroni's multiple comparisons test	Mean Diff,	95% CI of diff,	Significant?	Summary
0`` vs. 10%	0.12	-1,993 to 2,233	No	ns
0`` vs. 5``	0.14	-1,973 to 2,253	No	ns
0`` vs. 30``	0.22	-1,893 to 2,333	No	ns
0`` vs. 60``	-1.16	-3,273 to 0,9531	No	ns
0`` vs. 180``	-1.78	-3,893 to 0,3331	No	ns
Test details	Mean 1	Mean 2	Mean Diff,	SE of diff,	n1	n2	t	DF
0`` vs. 10%	1	0.88	0.12	0.7555	5	5	0.1588	24
0`` vs. 5``	1	0.86	0.14	0.7555	5	5	0.1853	24
0`` vs. 30``	1	0.78	0.22	0.7555	5	5	0.2912	24
0`` vs. 60``	1	2.16	-1.16	0.7555	5	5	1.535	24
0`` vs. 180``	1	2.78	-1.78	0.7555	5	5	2.356	24

## Sheet: Fig 2 - Supp 2B
Figure 2 - supp 2B : Quantification of coimmunoprecipitation between p27 and Cortactin in HeLa
			0.1	0"	5"	30"	60"	180"
	Exp #1	Quantification Cortactin	20373	24646	9691	8521	20316	15324
		Quantification p27	28122	34940	35463	33511	25832	15186
		Ratio	0.724451	0.705381	0.273271	0.254275	0.786466	1.00909
		Fold change	1.02703	1	0.387409	0.360479	1.11495	1.43056
	Exp #2	Quantification Cortactin	4111	4312	13215	26620	28235	26563
		Quantification p27	6887	25928	32995	35343	35589	23652
		Ratio	0.596922	0.166307	0.400515	0.75319	0.793363	1.12308
		Fold change	3.58928	1	2.40829	4.52892	4.77048	6.75304
	Exp #3	Quantification Cortactin	0	18922	6464	15587	17931	28230
		Quantification p27	8566	19569	21432	27228	33718	33822
		Ratio	0	0.966938	0.301605	0.572462	0.531793	0.834664
		Fold change	0	1	0.311918	0.592036	0.549977	0.863203
Table Analyzed	Fig 2 - Supp 2B	Table Analyzed	Fig 2 - Supp 2B
ANOVA summary		ANOVA summary
F	0.3969	F	0.3969
P value	0.8417	P value	0.8417
P value summary	ns	P value summary	ns
Are differences among means statistically significant? (P < 0.05)	No	Are differences among means statistically significant? (P < 0.05)	No
R square	0.1419	R square	0.1419
Brown-Forsythe test		Brown-Forsythe test
F (DFn, DFd)	0,4090 (5, 12)	F (DFn, DFd)	0,4090 (5, 12)
P value	0.8336	P value	0.8336
P value summary	ns	P value summary	ns
Significantly different standard deviations? (P < 0.05)	No	Significantly different standard deviations? (P < 0.05)	No							DF
Bartlett's test		Bartlett's test								12
Bartlett's statistic (corrected)		Bartlett's statistic (corrected)								12
P value		P value								12
P value summary		P value summary								12
Significantly different standard deviations? (P < 0.05)		Significantly different standard deviations? (P < 0.05)								12
ANOVA table	SS	ANOVA table	SS	DF	MS	F (DFn, DFd)	P value
Treatment (between columns)	8.641	Treatment (between columns)	8.641	5	1.728	F (5, 12) = 0,3969	P = 0,8417
Residual (within columns)	52.25	Residual (within columns)	52.25	12	4.354
Total	60.89	Total	60.89	17
Data summary		Data summary
Number of treatments (columns)	6	Number of treatments (columns)	6
Number of values (total)	18	Number of values (total)	18
Number of families	1	Number of families	1
Number of comparisons per family	5	Number of comparisons per family	5
Alpha	0.05	Alpha	0.05
Bonferroni's multiple comparisons test	Mean Diff,	Bonferroni's multiple comparisons test	Mean Diff,	95% CI of diff,	Significant?	Summary
0`` vs. 10%	-0.5388	0`` vs. 10%	-0.5388	-5,743 to 4,665	No	ns
0`` vs. 5``	-0.03587	0`` vs. 5``	-0.03587	-5,240 to 5,168	No	ns
0`` vs. 30``	-0.8271	0`` vs. 30``	-0.8271	-6,031 to 4,377	No	ns
0`` vs. 60``	-1.145	0`` vs. 60``	-1.145	-6,349 to 4,059	No	ns
0`` vs. 180``	-2.016	0`` vs. 180``	-2.016	-7,220 to 3,189	No	ns
Test details	Mean 1	Test details	Mean 1	Mean 2	Mean Diff,	SE of diff,	n1	n2	t	DF
0`` vs. 10%	1	0`` vs. 10%	1	1.539	-0.5388	1.704	3	3	0.3162	12
0`` vs. 5``	1	0`` vs. 5``	1	1.036	-0.03587	1.704	3	3	0.02106	12
0`` vs. 30``	1	0`` vs. 30``	1	1.827	-0.8271	1.704	3	3	0.4855	12
0`` vs. 60``	1	0`` vs. 60``	1	2.145	-1.145	1.704	3	3	0.6721	12
0`` vs. 180``	1	0`` vs. 180``	1	3.016	-2.016	1.704	3	3	1.183	12
