# Supplementary material for: p27Kip1 promotes invadopodia turnover and invasion through the regulation of the PAK1/Cortactin pathway
Source: eLife. 2017 Mar 13;6:e22207. doi: 10.7554/eLife.22207 (PMC5388532; doi:10.7554/eLife.22207)
Supplement: Figure 3—source data 1. — DOI: http://dx.doi.org/10.7554/eLife.22207.010 [file elife-22207-fig3-data1.xlsx]

## Sheet: Fig 3B
Figure 3B : Quantification of cells with invadopodia
			p27+/+			p27 CK-/CK-			p27 -/- #1			p27 -/- #2
			# cells	# Cells with invadopodia	% of invadopodia forming cells	# cells	# Cells with invadopodia	% of invadopodia forming cells	# cells	# Cells with invadopodia	% of invadopodia forming cells	# cells	# Cells with invadopodia	% of invadopodia forming cells
	Exp #1	Field #1	51	3	5.88235	21	0	0	13	6	46.1538	28	6	21.4286
		Field #2	22	2	9.09091	20	3	15	19	9	47.3684	37	10	27.027
		Field #3	29	5	17.2414	26	2	7.69231	11	5	45.4545	29	4	13.7931
		Field #4	33	0	0	20	2	10	12	5	41.6667	36	7	19.4444
		Field #5	29	1	3.44828	24	3	12.5	12	4	33.3333	40	6	15
		Field #6	43	4	9.30233	24	3	12.5	13	4	30.7692	24	6	25
		Field #7	39	1	2.5641	21	2	9.52381	13	6	46.1538	35	8	22.8571
		Field #8	93	3	3.22581	21	1	4.7619	10	3	30	49	13	26.5306
		Field #9	109	6	5.50459	32	2	6.25	16	9	56.25	29	8	27.5862
		Field #10	139	5	3.59712	36	2	5.55556	11	4	36.3636	17	6	35.2941
		Field #11	65	4	6.15385	22	1	4.54545	26	12	46.1538	24	7	29.1667
		Field #12	42	0	0	20	2	10	9	2	22.2222	36	6	16.6667
		Field #13	36	2	5.55556	26	3	11.5385	14	6	42.8571	30	3	10
		Field #14	24	1	4.16667	35	3	8.57143	11	5	45.4545	25	6	24
		Field #15	19	3	15.7895	22	0	0	13	6	46.1538	32	8	25
	Exp #2	Field #1	17	1	5.88235	18	2	11.1111	23	10	43.4783	8	6	75
		Field #2	20	2	10	27	2	7.40741	27	15	55.5556	10	8	80
		Field #3	19	1	5.26316	37	3	8.10811	23	8	34.7826	13	9	69.2308
		Field #4	35	1	2.85714	15	2	13.3333	28	10	35.7143	7	7	100
		Field #5	38	3	7.89474	14	3	21.4286	14	7	50	12	8	66.6667
		Field #6	44	3	6.81818	13	0	0	18	9	50	7	5	71.4286
		Field #7	80	4	5	17	2	11.7647	19	10	52.6316	8	6	75
		Field #8	137	8	5.83942	13	1	7.69231	23	15	65.2174	9	8	88.8889
		Field #9	161	4	2.48447	11	1	9.09091	28	13	46.4286	11	7	63.6364
		Field #10	214	11	5.14019	21	2	9.52381	24	13	54.1667	5	4	80
		Field #11	187	6	3.20856	15	3	20	20	8	40	10	8	80
		Field #12	50	2	4	23	2	8.69565	24	14	58.3333	9	5	55.5556
		Field #13	53	3	5.66038	12	3	25	21	11	52.381	18	13	72.2222
		Field #14	51	4	7.84314	16	2	12.5	22	11	50	9	7	77.7778
		Field #15	25	1	4	12	1	8.33333	17	7	41.1765	11	6	54.5455
		Field #16	21	1	4.7619	17	0	0
		Field #17	17	3	17.6471	7	1	14.2857
		Field #18	19	0	0	23	0	0
		Field #19	22	2	9.09091	14	2	14.2857
		Field #20	39	1	2.5641	14	2	14.2857
	Exp #3	Field #1	45	2	4.44444	29	2	6.89655	14	7	50	19	4	21.0526
		Field #2	15	2	13.3333	26	3	11.5385	19	12	63.1579	16	5	31.25
		Field #3	13	1	7.69231	31	2	6.45161	12	5	41.6667	25	8	32
		Field #4	23	0	0	24	2	8.33333	14	9	64.2857	23	7	30.4348
		Field #5	22	2	9.09091	11	0	0	20	12	60	24	6	25
		Field #6	33	3	9.09091	25	1	4	14	8	57.1429	24	4	16.6667
		Field #7	18	0	0	30	0	0	20	10	50	19	9	47.3684
		Field #8	19	1	5.26316	34	3	8.82353	12	8	66.6667	27	8	29.6296
		Field #9	17	0	0	22	1	4.54545	18	11	61.1111	17	4	23.5294
		Field #10	21	2	9.52381	42	2	4.7619	16	7	43.75	17	5	29.4118
		Field #11	17	1	5.88235	36	3	8.33333	7	2	28.5714	30	10	33.3333
		Field #12	31	2	6.45161	39	3	7.69231	17	7	41.1765	11	5	45.4545
		Field #13	16	1	6.25	37	3	8.10811	19	8	42.1053	16	3	18.75
		Field #14	14	0	0	33	4	12.1212	11	7	63.6364	31	12	38.7097
		Field #15	28	2	7.14286	27	2	7.40741	21	10	47.619	39	8	20.5128
ANOVA summary
F	178.8
P value	< 0,0001
P value summary	****
Are differences among means statistically significant? (P < 0.05)	Yes
R square	0.6566
Brown-Forsythe test
F (DFn, DFd)	50,94 (2, 187)
P value	< 0,0001
P value summary	****
Significantly different standard deviations? (P < 0.05)	Yes
Bartlett's test
Bartlett's statistic (corrected)	145.6
P value	< 0,0001
P value summary	****
Significantly different standard deviations? (P < 0.05)	Yes
ANOVA table	SS	DF	MS	F (DFn, DFd)	P value
Treatment (between columns)	66468	2	33234	F (2, 187) = 178,8	P < 0,0001
Residual (within columns)	34761	187	185.9
Total	101229	189
Bonferroni's multiple comparisons test	Mean Diff,	95% CI of diff,	Significant?	Summary	Adjusted P Value
p27+/+ vs. p27 CK-/CK-	-2.848	-9,010 to 3,314	No	ns	0.5953
p27+/+ vs. p27-/-	-38.83	-44,26 to -33,39	Yes	****	< 0,0001
Test details	Mean 1	Mean 2	Mean Diff,	SE of diff,	n1	n2	t	DF
p27+/+ vs. p27 CK-/CK-	5.836	8.684	-2.848	2.727	50	50	1.044	187
p27+/+ vs. p27-/-	5.836	44.66	-38.83	2.405	50	90	16.15	187

## Sheet: Fig 3D
Figure 3C : Quantification of degraded area per cells
			p27+/+			p27 CK-/CK-			p27 -/- #1			p27 -/- #2
			# cells	Sum degraded area (μm²)	Degraded per cells (μm²)	# cells	Sum degraded area (μm²)	Degraded per cells (μm²)	# cells	Sum degraded area (μm²)	Degraded per cells (μm²)	# cells	Sum degraded area (μm²)	Degraded per cells (μm²)
	Exp #1	Field #1	51	13.51	0.264902	21	1160	55.2381	13	6538.17	502.936	28	9375.72	334.847
		Field #2	22	0	0	20	41.3	2.065	19	8537.74	449.355	37	4598.21	124.276
		Field #3	29	0	0	26	142.91	5.49654	11	2083.76	189.433	29	18964.7	653.953
		Field #4	33	1007.57	30.5324	20	114.3	5.715	12	862.04	71.8367	36	2300.41	63.9003
		Field #5	29	0	0	24	594.32	24.7633	12	1750.34	145.862	40	4002.21	100.055
		Field #6	43	1691.69	39.3416	24	154.6	6.44167	13	582.9	44.8385	24	10739.1	447.463
		Field #7	39	1352.44	34.6779	21	245.01	11.6671	13	2520.11	193.855	35	19149.3	547.123
		Field #8	93	2644.7	28.4376	21	0	0	10	2535.2	253.52	49	10845.8	221.342
		Field #9	109	4743.51	43.5184	32	4293.6	134.175	16	1793.96	112.123	29	12949.1	446.52
		Field #10	139	3093.97	22.2588	36	0	0	11	2307.92	209.811	17	35633.6	2096.1
		Field #11	65	2958.94	45.5222	22	307.4	13.9727	26	1507.15	57.9673	24	7243.03	301.793
		Field #12	42	3072.39	73.1521	20	189.9	9.495	9	0	0	36	12844.6	356.795
		Field #13	36	1163.31	32.3142	26	680.39	26.1688	14	1011.49	72.2493	30	14489.8	482.994
		Field #14	24	845.92	35.2467	35	1463.94	41.8269	11	2191.56	199.233	25	9140.13	365.605
		Field #15	19	532.69	28.0363	22	0	0	13	1084.87	83.4515	32	19563.5	611.36
		Field #16										27	29267.8	1083.99
	Exp #2	Field #1	17	0	0	18	0	0	23	8917.26	387.707	8	2596.42	324.552
		Field #2	20	595.1	29.755	27	173.96	6.44296	27	6217.35	230.272	10	631.16	63.116
		Field #3	19	29.15	1.53421	37	0	0	23	2549.11	110.831	13	3138.19	241.399
		Field #4	35	545.9	15.5971	15	2066.53	137.769	28	4159.17	148.542	7	1014.21	144.887
		Field #5	38	0	0	14	230.9	16.4929	14	7443.16	531.654	12	6033.3	502.775
		Field #6	44	170.07	3.86523	13	32	2.46154	18	5163.75	286.875	7	1054.3	150.614
		Field #7	80	0	0	17	109.36	6.43294	19	1423.53	74.9226	8	1726.99	215.874
		Field #8	137	280.97	2.05088	13	63.3	4.86923	23	11792.9	512.734	9	2872.68	319.187
		Field #9	161	384.4	2.38758	11	0	0	28	5110.88	182.531	11	4811.22	437.384
		Field #10	214	365.03	1.70575	21	252.1	12.0048	24	7835.54	326.481	5	441.62	88.324
		Field #11	187	0	0	15	21.7	1.44667	20	1539.41	76.9705	10	4175.74	417.574
		Field #12	50	0	0	23	2479.52	107.805	24	9830.51	409.605	9	1395.62	155.069
		Field #13	53	0	0	12	255.4	21.2833	21	2423.81	115.42	18	5888.09	327.116
		Field #14	51	677.5	13.2843	16	0	0	22	7136.82	324.401	9	928.95	103.217
		Field #15	25	329.9	13.196	12	70.01	5.83417	17	5758.73	338.749	11	1884.06	171.278
	Exp #3	Field #1	45	1458.91	32.4202	29	125.79	4.33759	14	630.52	45.0371	19	7161.53	376.923
		Field #2	15	467.61	31.174	26	22.11	0.850385	19	1075.76	56.6189	16	9382.51	586.407
		Field #3	13	193.89	14.9146	31	12.26	0.395484	12	1883.65	156.971	25	19944.3	797.773
		Field #4	23	193.89	8.43	24	0	0	14	2759.43	197.102	23	862.23	37.4883
		Field #5	22	470.73	21.3968	11	0	0	20	2845.32	142.266	24	5676.56	236.523
		Field #6	33	905.93	27.4524	25	352.12	14.0848	14	21865.4	1561.82	24	6743.08	280.962
		Field #7	18	50.34	2.79667	30	0	0	20	2685.79	134.29	19	24647.6	1297.24
		Field #8	19	0	0	34	386.11	11.3562	12	7711.44	642.62	27	9511.42	352.275
		Field #9	17	0	0	22	144.31	6.55955	18	5218.96	289.942	17	2010.82	118.284
		Field #10	21	103.81	4.94333	42	23.52	0.56	16	5437.85	339.866	17	5294.64	311.449
		Field #11	17	804.87	47.3453	36	0	0	7	0	0	30	1931.53	64.3843
		Field #12	31	523.22	16.8781	39	26.76	0.686154	17	4009.79	235.87	11	5393.89	490.354
		Field #13	16	680.52	42.5325	37	33.75	0.912162	19	6614.69	348.142	16	313.7	19.6062
		Field #14	14	2296.55	164.039	33	866.34	26.2527	11	1407.05	127.914	31	4056.97	130.87
		Field #15	28	1783.13	63.6832	27	0	0	21	2450.96	116.712	39	3360.17	86.1582
ANOVA summary
F	36.26
P value	< 0,0001
P value summary	****
Are differences among means statistically significant? (P < 0.05)	Yes
R square	0.2895
Brown-Forsythe test
F (DFn, DFd)	19,45 (2, 178)
P value	< 0,0001
P value summary	****
Significantly different standard deviations? (P < 0.05)	Yes
Bartlett's test
Bartlett's statistic (corrected)	292
P value	< 0,0001
P value summary	****
Significantly different standard deviations? (P < 0.05)	Yes
ANOVA table	SS	DF	MS	F (DFn, DFd)	P value
Treatment (between columns)	3811000	2	1906000	F (2, 178) = 36,26	P < 0,0001
Residual (within columns)	9354000	178	52548
Total	13160000	180
Bonferroni's multiple comparisons test	Mean Diff,	95% CI of diff,	Significant?	Summary	Adjusted P Value
p27+/+ vs. p27 CK-/CK-	5.522	-103,7 to 114,8	No	ns	> 0,9999
p27+/+ vs. p27-/-	-287.4	-381,9 to -193,0	Yes	****	< 0,0001
Test details	Mean 1	Mean 2	Mean Diff,	SE of diff,	n1	n2	t	DF
p27+/+ vs. p27 CK-/CK-	21.66	16.14	5.522	48.33	45	45	0.1143	178
p27+/+ vs. p27-/-	21.66	309.1	-287.4	41.78	45	91	6.88	178

## Sheet: Fig 3F
Figure 3F : Quantification of cells with invadopodia after rescue
			empty			p27			p27CK-			p27 CK- 1-190
			# cells	# Cells with invadopodia	% of invadopodia forming cells	# cells	# Cells with invadopodia	% of invadopodia forming cells	# cells	# Cells with invadopodia	% of invadopodia forming cells	# cells	# Cells with invadopodia	% of invadopodia forming cells
	Exp #1	Field #1	24	18	75	23	7	30.4348	11	4	36.3636	10	5	50
		Field #2	33	15	45.4545	21	3	14.2857	15	4	26.6667	13	4	30.7692
		Field #3	15	8	53.3333	27	7	25.9259	14	4	28.5714	14	8	57.1429
		Field #4	27	15	55.5556	18	8	44.4444	14	3	21.4286	17	11	64.7059
		Field #5	11	5	45.4545	26	8	30.7692	21	7	33.3333	15	7	46.6667
		Field #6	44	19	43.1818	22	8	36.3636	15	4	26.6667	11	6	54.5455
		Field #7	32	14	43.75	15	4	26.6667	13	5	38.4615	20	12	60
		Field #8	31	12	38.7097	19	10	52.6316	13	4	30.7692	12	6	50
		Field #9	19	6	31.5789	27	12	44.4444	20	10	50	7	6	85.7143
		Field #10	25	11	44	16	4	25	12	3	25	12	6	50
	Exp #2	Field #1	16	6	37.5	24	4	16.6667	15	6	40
		Field #2	11	8	72.7273	25	3	12	15	7	46.6667
		Field #3	14	8	57.1429	28	13	46.4286	16	5	31.25
		Field #4	15	6	40	25	5	20	12	4	33.3333
		Field #5	15	5	33.3333	26	6	23.0769	12	4	33.3333
		Field #6	13	8	61.5385	27	6	22.2222	10	1	10
		Field #7	15	7	46.6667	22	5	22.7273	15	5	33.3333
		Field #8	11	3	27.2727	25	10	40	13	8	61.5385
		Field #9	14	3	21.4286	18	5	27.7778	15	2	13.3333
		Field #10	11	5	45.4545	18	7	38.8889	14	3	21.4286
	Exp #3	Field #1	24	11	45.8333	35	7	20	23	5	21.7391
		Field #2	19	9	47.3684	35	8	22.8571	20	8	40
		Field #3	18	10	55.5556	44	8	18.1818	19	3	15.7895
		Field #4	16	7	43.75	42	7	16.6667	16	5	31.25
		Field #5	17	9	52.9412	48	9	18.75	20	5	25
		Field #6	17	9	52.9412	28	3	10.7143	25	3	12
		Field #7	13	7	53.8462	33	5	15.1515	19	3	15.7895
		Field #8	16	10	62.5	25	6	24	18	3	16.6667
		Field #9	16	8	50	35	7	20	10	1	10
		Field #10	19	7	36.8421	32	4	12.5	19	4	21.0526
	Exp #4	Field #1	16	11	68.75				28	7	25	45	26	57.7778
		Field #2	29	19	65.5172				27	8	29.6296	50	29	58
		Field #3	42	24	57.1429				40	9	22.5	32	22	68.75
		Field #4	36	24	66.6667				31	13	41.9355	39	24	61.5385
		Field #5	38	17	44.7368				49	12	24.4898	25	16	64
		Field #6	47	24	51.0638				22	10	45.4545	27	20	74.0741
		Field #7	60	33	55				34	19	55.8824	32	22	68.75
		Field #8	59	28	47.4576				43	20	46.5116	22	14	63.6364
		Field #9	59	36	61.0169				28	7	25	31	18	58.0645
		Field #10	77	47	61.039				39	11	28.2051	40	20	50
	Exp #5	Field #1	20	14	70				25	10	40	14	6	42.8571
		Field #2	31	10	32.2581				32	9	28.125	26	8	30.7692
		Field #3	14	6	42.8571				40	11	27.5	34	15	44.1176
		Field #4	16	6	37.5				37	9	24.3243	28	12	42.8571
		Field #5	25	9	36				26	7	26.9231	34	11	32.3529
		Field #6	30	11	36.6667				39	9	23.0769	33	16	48.4848
		Field #7	28	13	46.4286				30	5	16.6667	40	15	37.5
		Field #8	24	9	37.5				29	10	34.4828	28	14	50
		Field #9	21	9	42.8571				32	5	15.625	37	17	45.9459
		Field #10	15	7	46.6667				48	10	20.8333	32	14	43.75
ANOVA summary
F	48.83
P value	< 0,0001
P value summary	****
Are differences among means statistically significant? (P < 0.05)	Yes
R square	0.4843
Brown-Forsythe test
F (DFn, DFd)	0,2476 (3, 156)
P value	0.8629
P value summary	ns
Significantly different standard deviations? (P < 0.05)	No
Bartlett's test
Bartlett's statistic (corrected)	0.652
P value	0.8844
P value summary	ns
Significantly different standard deviations? (P < 0.05)	No
ANOVA table	SS	DF	MS	F (DFn, DFd)	P value
Treatment (between columns)	20551	3	6850	F (3, 156) = 48,83	P < 0,0001
Residual (within columns)	21884	156	140.3
Total	42435	159
Bonferroni's multiple comparisons test	Mean Diff,	95% CI of diff,	Significant?	Summary	Adjusted P Value
empty vs. p27	22.57	15,95 to 29,19	Yes	****	< 0,0001
empty vs. p27CK-	19.5	13,77 to 25,23	Yes	****	< 0,0001
empty vs. p27CK- 1-190	-4.54	-11,16 to 2,080	No	ns	0.2969
Test details	Mean 1	Mean 2	Mean Diff,	SE of diff,	n1	n2	t	DF
empty vs. p27	48.56	25.99	22.57	2.735	50	30	8.251	156
empty vs. p27CK-	48.56	29.06	19.5	2.369	50	50	8.232	156
empty vs. p27CK- 1-190	48.56	53.1	-4.54	2.735	50	30	1.66	156

## Sheet: Fig 3G
Figure 3G : Quantification of degraded area after rescue
			empty				p27				p27CK-				p27 CK- 1-190
			# cells	Sum degraded area (μm²)	Degraded per cells (μm²)	Fold change relative to empty mean	# cells	Sum degraded area (μm²)	Degraded per cells (μm²)	Fold change relative to empty mean	# cells	Sum degraded area (μm²)	Degraded per cells (μm²)	Fold change relative to empty mean	# cells	Sum degraded area (μm²)	Degraded per cells (μm²)	Fold change relative to empty mean
	Exp #1	Field #1	24	9846.1	410.254	0.70959	23	491.33	21.3622	0.0369487	11	1156.04	105.095	0.181775	10	15208.8	1520.88	2.63056
		Field #2	33	8613.17	261.005	0.451443	21	1492.95	71.0929	0.122965	15	6223.69	414.913	0.717647	13	5249.37	403.798	0.698422
		Field #3	15	8934.44	595.629	1.03022	27	2846.78	105.436	0.182366	14	0	0	0	14	4592.78	328.056	0.567416
		Field #4	27	10556.1	390.968	0.676232	18	67.48	3.74889	0.00648421	14	651.26	46.5186	0.0804601	17	8010.93	471.231	0.815057
		Field #5	11	11951.1	1086.46	1.87918	26	3168.17	121.853	0.210761	21	864.6	41.1714	0.0712115	15	7177.4	478.493	0.827618
		Field #6	44	12919.1	293.615	0.507847	22	1954.84	88.8564	0.153689	15	1967.08	131.139	0.226822	11	4767.82	433.438	0.749689
		Field #7	32	8725.34	272.667	0.471614	15	164.46	10.964	0.0189637	13	10568.1	812.928	1.40607	20	7528.32	376.416	0.651062
		Field #8	31	9200.67	296.796	0.513348	19	4310.91	226.89	0.392437	13	3459.39	266.107	0.460268	12	2901.61	241.801	0.418227
		Field #9	19	21209.8	1116.31	1.9308	27	159.42	5.90444	0.0102125	20	757.95	37.8975	0.0655488	7	9176.71	1310.96	2.26748
		Field #10	25	26446.7	1057.87	1.82973	16	144.2	9.0125	0.0155883	12	781.09	65.0908	0.112583	12	7283.19	606.933	1.04977
		Mean			578.157
	Exp #2	Field #1	16	5358.99	334.937	0.289854	24	5945.65	247.735	0.21439	15	12640.2	842.677	0.72925
		Field #2	11	26115.8	2374.16	2.05459	25	1261.98	50.4792	0.0436846	15	11631.1	775.409	0.671037
		Field #3	14	18717	1336.93	1.15697	28	7424.53	265.162	0.22947	16	9452.37	590.773	0.511254
		Field #4	15	15911.7	1060.78	0.917995	25	9641.81	385.672	0.33376	12	5377.08	448.09	0.387776
		Field #5	15	10623.1	708.21	0.612883	26	8995.62	345.985	0.299415	12	19096.6	1591.39	1.37718
		Field #6	13	18079.3	1390.71	1.20352	27	13605.1	503.891	0.436066	10	3842.42	384.242	0.332522
		Field #7	15	24188.9	1612.59	1.39553	22	1577.7	71.7136	0.0620608	15	15880.4	1058.69	0.916191
		Field #8	11	11867.4	1078.86	0.93364	25	10511.3	420.451	0.363857	13	23384.3	1798.79	1.55667
		Field #9	14	14711.2	1050.8	0.90936	18	12648.4	702.688	0.608104	15	14534.9	968.993	0.838564
		Field #10	11	6681.5	607.409	0.52565	18	8288.29	460.461	0.398481	14	18943.7	1353.12	1.17099
		Mean			1155.54
	Exp #3	Field #1	24	15871.7	661.32	0.777177	35	4577.6	130.789	0.153701	23	12161.3	528.753	0.621385
		Field #2	19	9830.93	517.417	0.608064	35	5530.79	158.023	0.185707	20	4979.34	248.967	0.292584
		Field #3	18	14876.1	826.448	0.971234	44	8024.8	182.382	0.214333	19	3571.99	187.999	0.220935
		Field #4	16	24438.5	1527.41	1.79499	42	8756.05	208.477	0.245001	16	7980.17	498.761	0.586139
		Field #5	17	8024.51	472.03	0.554725	48	3562.51	74.219	0.0872214	20	5703.23	285.162	0.335119
		Field #6	17	17140.5	1008.27	1.18491	28	4331.6	154.7	0.181802	25	3881.27	155.251	0.182449
		Field #7	13	17836.9	1372.07	1.61244	33	2356.77	71.4173	0.0839289	19	1391.78	73.2516	0.0860846
		Field #8	16	5013.3	313.331	0.368224	25	1818.93	72.7572	0.0855036	18	2352.82	130.712	0.153612
		Field #9	16	10569.8	660.61	0.776343	35	3848	109.943	0.129204	10	0	0	0
		Field #10	19	21856.9	1150.36	1.3519	32	10412	325.374	0.382377	19	10454.9	550.26	0.64666
		Mean			850.926
	Exp #4	Field #1	16	6575.37	410.961	1.31815					28	321.67	11.4882	0.0368484	45	8945.39	198.786	0.637607
		Field #2	29	3409.31	117.562	0.377081					27	3970.42	147.053	0.471671	50	10168	203.359	0.652273
		Field #3	42	42150.9	1003.59	3.21902					40	914.94	22.8735	0.0733667	32	8471.34	264.729	0.849119
		Field #4	36	1691.07	46.9742	0.150669					31	5421.36	174.883	0.560935	39	4991.02	127.975	0.410479
		Field #5	38	7935.32	208.824	0.669803					49	2648.06	54.042	0.17334	25	2013.57	80.5428	0.258341
		Field #6	47	22414.8	476.91	1.52969					22	0	0	0	27	6832.4	253.052	0.811663
		Field #7	60	10455.7	174.261	0.558942					34	2016.05	59.2956	0.19019	32	7516.7	234.897	0.753431
		Field #8	59	14561.3	246.802	0.791616					43	0	0	0	22	10777.9	489.905	1.57137
		Field #9	59	15328.9	259.811	0.833343					28	1247.04	44.5371	0.142853	31	4763.43	153.659	0.492861
		Field #10	77	13243.9	171.998	0.551684					39	7370.97	188.999	0.606214	40	3578.18	89.4545	0.286925
		Mean			311.77
	Exp #5	Field #1	20	13848.4	692.422	1.7149					25	2173.31	86.9324	0.215302	14	31088.1	2220.58	5.49964
		Field #2	31	6641.81	214.252	0.53063					32	0	0	0	26	3851.47	148.133	0.366877
		Field #3	14	9449.61	674.972	1.67168					40	184.93	4.62325	0.0114502	34	3625.29	106.626	0.264077
		Field #4	16	4052.75	253.297	0.627331					37	331.91	8.97054	0.022217	28	6394.79	228.385	0.565634
		Field #5	25	14109.7	564.388	1.3978					26	172.71	6.64269	0.0164517	34	5705.45	167.807	0.415603
		Field #6	30	15645.5	521.515	1.29162					39	494.47	12.6787	0.0314009	33	1655.65	50.1712	0.124257
		Field #7	28	2493.53	89.0546	0.220559					30	315.87	10.529	0.0260768	40	4585.94	114.649	0.283946
		Field #8	24	4941.08	205.878	0.509892					29	1059.05	36.519	0.0904452	28	4918.86	175.674	0.435085
		Field #9	21	9193.78	437.799	1.08428					32	972.54	30.3919	0.0752705	37	14300.3	386.494	0.957216
		Field #10	15	5761.65	384.11	0.951312					48	823.2	17.15	0.0424748	32	2179.59	68.1122	0.168691
		Mean			403.769
ANOVA summary
F	16.65
P value	< 0,0001
P value summary	****
Are differences among means statistically significant? (P < 0.05)	Yes
R square	0.2426
Brown-Forsythe test
F (DFn, DFd)	4,133 (3, 156)
P value	0.0075
P value summary	**
Significantly different standard deviations? (P < 0.05)	Yes
Bartlett's test
Bartlett's statistic (corrected)	90.43
P value	< 0,0001
P value summary	****
Significantly different standard deviations? (P < 0.05)	Yes
ANOVA table	SS	DF	MS	F (DFn, DFd)	P value
Treatment (between columns)	18.18	3	6.061	F (3, 156) = 16,65	P < 0,0001
Residual (within columns)	56.78	156	0.364
Total	74.97	159
Bonferroni's multiple comparisons test	Mean Diff,	95% CI of diff,	Significant?	Summary	Adjusted P Value
empty vs. p27	0.8036	0,4664 to 1,141	Yes	****	< 0,0001
empty vs. p27CK-	0.6446	0,3526 to 0,9366	Yes	****	< 0,0001
empty vs. p27CK- 1-190	0.1163	-0,2209 to 0,4535	No	ns	> 0,9999
Test details	Mean 1	Mean 2	Mean Diff,	SE of diff,	n1	n2	t	DF
empty vs. p27	0.9996	0.196	0.8036	0.1393	50	30	5.768	156
empty vs. p27CK-	0.9996	0.355	0.6446	0.1207	50	50	5.342	156
empty vs. p27CK- 1-190	0.9996	0.8833	0.1163	0.1393	50	30	0.8345	156
