# Supplementary material for: p27Kip1 promotes invadopodia turnover and invasion through the regulation of the PAK1/Cortactin pathway
Source: eLife. 2017 Mar 13;6:e22207. doi: 10.7554/eLife.22207 (PMC5388532; doi:10.7554/eLife.22207)
Supplement: Figure 4—source data 1. — DOI: http://dx.doi.org/10.7554/eLife.22207.016 [file elife-22207-fig4-data1.xlsx]

## Sheet: 4B - 12h
Fig 4B : Relative wound density at 12h
		p27+/+	p27CK-/CK-	p27-/- #1	p27-/- #2
	Exp #1	51.6	47.3	40.2	26.0333
		61.0667	49.0333	25.3667	23
		50.9667	51.1333	32.6	24.1333
		55.5	48.8	28.4	22.0333
	Exp #2	55.9	93	49.9333	37.6333
		59.9667	55.9	46.9	35.4667
		47.6333	56.8333	50.3667	41
		62	57.0333	45.4	33.3667
	Exp #3	55.6	64.2667	35.2667	37.0667
		70.5333	64.1	35.2667	38.2
		61.5333	66.4667	41.8667	36.4667
		64.7667		34.8
	Exp #4	62.3333	60.7667	34.3667	31.2667
		80.7667	76.5333	34.4333	29.4667
		78.4	70.8667	31.9667	32.1667
		70.9333	69.4667	30.5333	30.1667
	Exp #5	48.9333	61.8333	34.7333	34
		64.8667	53.1667	37.9333	32.7
		66.4667	57.5	43.8667	33.3333
		63.0333	65.5333	33.8667	28.5
ANOVA summary
F	96.2
P value	< 0,0001
P value summary	****
Are differences among means statistically significant? (P < 0.05)	Yes
R square	0.7195
Brown-Forsythe test
F (DFn, DFd)	2,220 (2, 75)
P value	0.1157
P value summary	ns
Significantly different standard deviations? (P < 0.05)	No
Bartlett's test
Bartlett's statistic (corrected)	6.442
P value	0.0399
P value summary	*
Significantly different standard deviations? (P < 0.05)	Yes
ANOVA table	SS	DF	MS	F (DFn, DFd)	P value
Treatment (between columns)	14088	2	7044	F (2, 75) = 96,20	P < 0,0001
Residual (within columns)	5492	75	73.22
Total	19580	77
Bonferroni's multiple comparisons test	Mean Diff,	95% CI of diff,	Significant?	Summary	Adjusted P Value
p27+/+ vs. p27CK-/CK-	0.08561	-6,185 to 6,356	No	ns	> 0,9999
p27+/+ vs. p27-/-	26.92	21,54 to 32,30	Yes	****	< 0,0001
Test details	Mean 1	Mean 2	Mean Diff,	SE of diff,	n1	n2	t	DF
p27+/+ vs. p27CK-/CK-	61.64	61.55	0.08561	2.741	20	19	0.03123	75
p27+/+ vs. p27-/-	61.64	34.72	26.92	2.353	20	39	11.44	75

## Sheet: 4B - 24h
Fig 4B : Relative wound density at 24h
		p27+/+	p27CK-/CK-	p27-/- #1	p27-/- #2
	Exp #1	84.7667	58.8333	62.9333	44.7333
		87.9667	74.6667	46.9	39.8333
		82	76.8	61.9333	41.6
		91.7	77.7667	53.4	40.3667
	Exp #2	89.8333	100	81.7333	73.0667
		86.8667	86.8333	83.7333	66.4
		65.9333	77.6333	81.6333	73.7
		89.2333	81.9667	80.8333	64.3
	Exp #3	80.0667	93.8	64.8	68.0667
		87.7	72.6333	60.7667	69.6
		82.0333	81	67.2333	69.0667
		83.9	82.6	72.2	69.0333
	Exp #4	85.4333	81.0333	68.1667	63.6667
		96.9333	94.8333	62.6333	65
		95.2333	92.5667	57.2667	63.6
		92.3333	90.8	54.5	60.6333
	Exp #5	78.7333	81.1667	65.8	61.5333
		90.9667	71.5667	64.3667	63.8
		92.6667	82.9	61.4	60.8
		88.9	90.0333	64.3333	56.7667
ANOVA summary
F	50.81
P value	< 0,0001
P value summary	****
Are differences among means statistically significant? (P < 0.05)	Yes
R square	0.5689
Brown-Forsythe test
F (DFn, DFd)	0,9656 (2, 77)
P value	0.3853
P value summary	ns
Significantly different standard deviations? (P < 0.05)	No
Bartlett's test
Bartlett's statistic (corrected)	3.951
P value	0.1387
P value summary	ns
Significantly different standard deviations? (P < 0.05)	No
ANOVA table	SS	DF	MS	F (DFn, DFd)	P value
Treatment (between columns)	9217	2	4609	F (2, 77) = 50,81	P < 0,0001
Residual (within columns)	6984	77	90.7
Total	16201	79
Bonferroni's multiple comparisons test	Mean Diff,	95% CI of diff,	Significant?	Summary	Adjusted P Value
p27+/+ vs. p27CK-/CK-	4.188	-2,696 to 11,07	No	ns	0.3366
p27+/+ vs. p27-/-	23.36	17,39 to 29,32	Yes	****	< 0,0001
Test details	Mean 1	Mean 2	Mean Diff,	SE of diff,	n1	n2	t	DF
p27+/+ vs. p27CK-/CK-	86.66	82.47	4.188	3.012	20	20	1.391	77
p27+/+ vs. p27-/-	86.66	63.3	23.36	2.608	20	40	8.955	77

## Sheet: 4D -
Fig D : Relative invasion
		p27+/+		p27CK-/CK-		p27-/-
		OD	Fold change (from mean of p27+/+)	OD	Fold change (from mean of p27+/+)	OD	Fold change (from mean of p27+/+)
	Exp #1	0.825	1.10887	1.099	1.47715	0.515	0.692204
		0.673	0.90457	0.995	1.33737	0.478	0.642473
		0.734	0.986559	1.054	1.41667	0.755	1.01478
	Exp #2	0.632	0.995798	0.606	0.954832	0.317	0.499475
		0.658	1.03676	0.569	0.896534	0.226	0.356092
		0.614	0.967437	0.53	0.835084	0.256	0.403361
	Exp #3	0.502	1.08345	0.556	1.2	0.297	0.641007
		0.325	0.701439	0.762	1.6446	0.259	0.558993
		0.563	1.21511	0.773	1.66835	0.336	0.72518
ANOVA summary
F	18.39
P value	< 0,0001
P value summary	****
Are differences among means statistically significant? (P < 0.05)	Yes
R square	0.6051
Brown-Forsythe test
F (DFn, DFd)	3,213 (2, 24)
P value	0.058
P value summary	ns
Significantly different standard deviations? (P < 0.05)	No
Bartlett's test
Bartlett's statistic (corrected)	4.755
P value	0.0928
P value summary	ns
Significantly different standard deviations? (P < 0.05)	No
ANOVA table	SS	DF	MS	F (DFn, DFd)	P value
Treatment (between columns)	1.953	2	0.9766	F (2, 24) = 18,39	P < 0,0001
Residual (within columns)	1.275	24	0.05311
Total	3.228	26
Number of families	1
Number of comparisons per family	3
Alpha	0.05
Bonferroni's multiple comparisons test	Mean Diff,	95% CI of diff,	Significant?	Summary	Adjusted P Value
p27+/+ vs. p27CK-/CK-	-0.2701	-0,5497 to 0,009476	No	ns	0.0608
p27+/+ vs. p27-/-	0.3853	0,1057 to 0,6649	Yes	**	0.0049
p27CK-/CK- vs. p27-/-	0.6554	0,3759 to 0,9350	Yes	****	< 0,0001
Test details	Mean 1	Mean 2	Mean Diff,	SE of diff,	n1	n2	t	DF
p27+/+ vs. p27CK-/CK-	1	1.27	-0.2701	0.1086	9	9	2.486	24
p27+/+ vs. p27-/-	1	0.6147	0.3853	0.1086	9	9	3.547	24
p27CK-/CK- vs. p27-/-	1.27	0.6147	0.6554	0.1086	9	9	6.033	24

## Sheet: 4E - rescue invasion
Fig E : Rescue of invasion with p27 mutants
		empty		p27CK-		p27CK- 1-190
		OD	Fold change (from mean of empty)	OD	Fold change (from mean of empty)	OD	Fold change (from mean of empty)
	Exp #1	0.358	1	0.58	1.62011	0.318	0.888268
	Exp #2	0.132	1.56213	0.102	1.2071	0.101	1.19527
		0.037	0.43787	0.238	2.81657	0.03	0.35503
	Exp #3	0.195	0.756792	0.471	1.82794	0.253	0.981889
		0.139	0.539457	0.672	2.60802	0.181	0.702458
		0.439	1.70375	0.483	1.87451	0.375	1.45537
	Exp #4	0.127	0.422863	0.282	0.938957	0.253	0.842397
		0.246	0.81909	0.368	1.22531	0.323	1.07547
		0.528	1.75805	0.774	2.57714	0.354	1.17869
ANOVA summary
F	7.993
P value	0.0022
P value summary	**
Are differences among means statistically significant? (P < 0.05)	Yes
R square	0.3998
Brown-Forsythe test
F (DFn, DFd)	2,206 (2, 24)
P value	0.132
P value summary	ns
Significantly different standard deviations? (P < 0.05)	No
Bartlett's test
Bartlett's statistic (corrected)	4.022
P value	0.1338
P value summary	ns
Significantly different standard deviations? (P < 0.05)	No
ANOVA table	SS	DF	MS	F (DFn, DFd)	P value
Treatment (between columns)	4.582	2	2.291	F (2, 24) = 7,993	P = 0,0022
Residual (within columns)	6.879	24	0.2866
Total	11.46	26
Bonferroni's multiple comparisons test	Mean Diff,	95% CI of diff,	Significant?	Summary	Adjusted P Value
empty vs. p27CK-	-0.8551	-1,505 to -0,2056	Yes	**	0.0073
empty vs. p27CK- 1-190	0.03633	-0,6132 to 0,6858	No	ns	> 0,9999
p27CK- vs. p27CK- 1-190	0.8914	0,2419 to 1,541	Yes	**	0.0051
Test details	Mean 1	Mean 2	Mean Diff,	SE of diff,	n1	n2	t	DF
empty vs. p27CK-	1	1.855	-0.8551	0.2524	9	9	3.388	24
empty vs. p27CK- 1-190	1	0.9637	0.03633	0.2524	9	9	0.144	24
p27CK- vs. p27CK- 1-190	1.855	0.9637	0.8914	0.2524	9	9	3.532	24
