# Supplementary material for: p27Kip1 promotes invadopodia turnover and invasion through the regulation of the PAK1/Cortactin pathway
Source: eLife. 2017 Mar 13;6:e22207. doi: 10.7554/eLife.22207 (PMC5388532; doi:10.7554/eLife.22207)
Supplement: Figure 5—source data 1. — DOI: http://dx.doi.org/10.7554/eLife.22207.019 [file elife-22207-fig5-data1.xlsx]

## Sheet: Fig 5A
Figure 5A: Quantification of invadopodia lifetime (min)
		p27+/+	p27-/-
	Exp #1	12	122
		28	140
		48	10
		22	26
		8	106
		4	68
		22	42
		6	122
		6	232
		22	70
		8	72
		16	46
		20	54
		20	88
		16	56
		20	82
		12	80
		28	112
		10	102
		12	166
	Exp #2	4	28
		10	292
		4	102
		14	80
		8	136
		14	16
		10	26
		14	40
		14	38
		12	68
		10	36
		6	26
		38	10
		54	54
		22	16
		10	32
		16	84
		4	38
		6	12
		40	32
	Exp #3	40	216
		12	44
		32	28
		20	18
		30	10
		14	72
		14	34
		6	18
		6	22
		14	54
		4	56
		16	82
		20	28
		12	54
		44	28
		12	46
		10	16
		8	18
		18	52
		24	96
Column B	p27-/-
vs.	vs,
Column A	p27+/+
Unpaired t test
P value	< 0,0001
P value summary	****
Significantly different? (P < 0.05)	Yes
One- or two-tailed P value?	Two-tailed
t, df	t=6,651 df=118
How big is the difference?
Mean ± SEM of column A	16,77 ± 1,486 N=60
Mean ± SEM of column B	65,90 ± 7,236 N=60
Difference between means	49,13 ± 7,387
95% confidence interval	34,51 to 63,76
R square	0.2727
F test to compare variances
F,DFn, Dfd	23,71, 59, 59
P value	< 0,0001
P value summary	****
Significantly different? (P < 0.05)	Yes

## Sheet: Fig 5C
Figure 5B: Quantification of coimmunoprecipitation between Cortactin and PAK1 in MEF E6
			p27+/+	p27-/-
	Exp #1	Quantification Cortactin	12986	10450
		Quantification PAK1	19029	32332
		Ratio	0.682432	0.323209
		Fold change	1	0.473614
	Exp #2	Quantification Cortactin	10211	5867
		Quantification PAK1	19400	31618
		Ratio	0.52634	0.185559
		Fold change	1	0.352545
	Exp #3	Quantification Cortactin	53944	7779
		Quantification PAK1	12294	43834
		Ratio	4.38783	0.177465
		Fold change	1	0.0404448
		Table Analyzed	Fig 5C
		Column B	p27-/-
		vs.	vs,
		Column A	p27+/+
		Unpaired t test
		P value	0.0051
		P value summary	**
		Significantly different? (P < 0.05)	Yes
		One- or two-tailed P value?	Two-tailed
		t, df	t=5,568 df=4
		How big is the difference?
		Mean ± SEM of column A	1,000 ± 0,0 N=3
		Mean ± SEM of column B	0,2867 ± 0,1281 N=3
		Difference between means	-0,7133 ± 0,1281
		95% confidence interval	-1,069 to -0,3577
		R square	0.8857
		F test to compare variances
		F,DFn, Dfd
		P value
		P value summary
		Significantly different? (P < 0.05)

## Sheet: Fig 5E
Figure 5E: Quantification of coimmunoprecipitation between Cortactin and PAK1 in MEF E6 after serum stimulation
			0"	5"	30"	60"	180"
	Exp #1	Quantification Cortactin	17670	15190	3443	12521	38832		1	0.786373			1.93093
		Quantification PAK1	15400	16835	0	0	17527		1	0.955641	1.56009	1.40489	1.1977
		Ratio	1.1474	0.902287	#DIV/0!	#DIV/0!	2.21555		1	0.728887	1.2771	1.02425	3.36336
		Fold change	1	0.786373	#DIV/0!	#DIV/0!	1.93093		1	0.287806	0.474891	0.793466	1.38976
	Exp #2	Quantification Cortactin	27912	21020	28091	30342	27345
		Quantification PAK1	30062	23690	19393	23261	24590
		Ratio	0.928481	0.887294	1.44851	1.30442	1.11204
		Fold change	1	0.955641	1.56009	1.40489	1.1977
	Exp #3	Quantification Cortactin	4205	3643	9113	7112	21634
		Quantification PAK1	15674	18630	26598	25882	23976
		Ratio	0.268279	0.195545	0.34262	0.274786	0.902319
		Fold change	1	0.728887	1.2771	1.02425	3.36336
	Exp #4	Quantification Cortactin	37655	9540	17551	31016	17615
		Quantification PAK1	19664	17310	19300	20413	6619
		Ratio	1.91492	0.551127	0.909378	1.51942	2.66128
		Fold change	1	0.287806	0.474891	0.793466	1.38976
	Table Analyzed	Fig 5E
	ANOVA summary
	F	3.001
	P value	0.0587
	P value summary	ns
	Are differences among means statistically significant? (P < 0.05)	No
	R square	0.4801
	Brown-Forsythe test
	F (DFn, DFd)	1,687 (4, 13)
	P value	0.2128
	P value summary	ns
	Significantly different standard deviations? (P < 0.05)	No
	Bartlett's test
	Bartlett's statistic (corrected)
	P value
	P value summary
	Significantly different standard deviations? (P < 0.05)
	ANOVA table	SS	DF	MS	F (DFn, DFd)	P value
	Treatment (between columns)	3.641	4	0.9103	F (4, 13) = 3,001	P = 0,0587
	Residual (within columns)	3.944	13	0.3034
	Total	7.585	17
	Data summary
	Number of treatments (columns)	5
	Number of values (total)	18
	Number of families	1
	Number of comparisons per family	4
	Alpha	0.05
	Bonferroni's multiple comparisons test	Mean Diff,	95% CI of diff,	Significant?	Summary
	0`` vs. 5``	0.3103	-0,8176 to 1,438	No	ns
	0`` vs. 30``	-0.104	-1,322 to 1,114	No	ns
	0`` vs. 60``	-0.0742	-1,293 to 1,144	No	ns
	0`` vs. 180``	-0.9704	-2,098 to 0,1575	No	ns
	Test details	Mean 1	Mean 2	Mean Diff,	SE of diff,	n1	n2	t	DF
	0`` vs. 5``	1	0.6897	0.3103	0.3895	4	4	0.7968	13
	0`` vs. 30``	1	1.104	-0.104	0.4207	4	3	0.2473	13
	0`` vs. 60``	1	1.074	-0.0742	0.4207	4	3	0.1764	13
	0`` vs. 180``	1	1.97	-0.9704	0.3895	4	4	2.492	13
