# Supplementary material for: p27Kip1 promotes invadopodia turnover and invasion through the regulation of the PAK1/Cortactin pathway
Source: eLife. 2017 Mar 13;6:e22207. doi: 10.7554/eLife.22207 (PMC5388532; doi:10.7554/eLife.22207)
Supplement: Figure 6—source data 1. — DOI: http://dx.doi.org/10.7554/eLife.22207.025 [file elife-22207-fig6-data1.xlsx]

## Sheet: Fig 6A
Figure 6A: Quantification of invadopodia forming cells after PAK1 silencing
			p27+/+						p27 -/-
			si control			si PAK1			si control			si PAK1
			# cells	# Cells with invadopodia	% of invadopodia forming cells	# cells	# Cells with invadopodia	% of invadopodia forming cells	# cells	# Cells with invadopodia	% of invadopodia forming cells	# cells	# Cells with invadopodia	% of invadopodia forming cells
	Exp #1	Field #1							46	17	36.9565	39	15	38.4615
		Field #2							70	34	48.5714	39	17	43.5897
		Field #3							54	15	27.7778	46	18	39.1304
		Field #4							34	15	44.1176	58	25	43.1034
		Field #5							30	8	26.6667	19	11	57.8947
		Field #6							50	19	38	23	5	21.7391
		Field #7							59	24	40.678	20	5	25
		Field #8							51	25	49.0196	46	18	39.1304
		Field #9							59	21	35.5932	25	9	36
		Field #10							39	15	38.4615	16	6	37.5
	Exp #2	Field #1	32	3	9.375	34	7	20.5882
		Field #2	23	3	13.0435	36	7	19.4444
		Field #3	34	2	5.88235	46	7	15.2174
		Field #4	27	5	18.5185	46	9	19.5652
		Field #5	47	3	6.38298	66	10	15.1515
		Field #6	34	3	8.82353	37	8	21.6216
		Field #7	36	4	11.1111	34	6	17.6471
		Field #8	56	3	5.35714	44	6	13.6364
		Field #9	77	5	6.49351	31	5	16.129
		Field #10	78	8	10.2564	43	7	16.2791
	Exp #3	Field #1	40	3	7.5	105	14	13.3333	71	20	28.169	57	26	45.614
		Field #2	28	2	7.14286	93	11	11.828	72	20	27.7778	64	38	59.375
		Field #3	24	4	16.6667	62	10	16.129	75	20	26.6667	70	30	42.8571
		Field #4	24	3	12.5	52	14	26.9231	88	20	22.7273	92	34	36.9565
		Field #5	43	4	9.30233	65	11	16.9231	87	37	42.5287	123	59	47.9675
		Field #6	34	5	14.7059	58	10	17.2414	81	32	39.5062	100	42	42
		Field #7	36	5	13.8889	30	8	26.6667	89	36	40.4494	82	44	53.6585
		Field #8	35	6	17.1429	41	8	19.5122	64	32	50	84	38	45.2381
		Field #9	35	4	11.4286	90	26	28.8889	60	30	50	52	33	63.4615
		Field #10	52	8	15.3846	67	12	17.9104	64	32	50	70	32	45.7143
	Exp #4	Field #1							28	11	39.2857	22	5	22.7273
		Field #2							25	9	36	14	2	14.2857
		Field #3							41	12	29.2683	22	3	13.6364
		Field #4							18	8	44.4444	24	8	33.3333
		Field #5							44	11	25	21	4	19.0476
		Field #6							31	7	22.5806	28	5	17.8571
		Field #7							36	13	36.1111	21	4	19.0476
		Field #8							53	19	35.8491	26	5	19.2308
		Field #9							30	8	26.6667	19	2	10.5263
		Field #10							35	15	42.8571	15	3	20
	Exp #5	Field #1	78	3	3.84615	30	6	20
		Field #2	89	6	6.74157	23	8	34.7826
		Field #3	49	3	6.12245	29	10	34.4828
		Field #4	69	5	7.24638	70	15	21.4286
		Field #5	68	5	7.35294	61	19	31.1475
		Field #6	62	4	6.45161	62	18	29.0323
		Field #7	80	3	3.75	35	14	40
		Field #8	89	6	6.74157	29	10	34.4828
		Field #9	89	9	10.1124	36	12	33.3333
		Field #10	98	7	7.14286	39	8	20.5128
ANOVA summary
F	52.61
P value	< 0,0001
P value summary	****
Are differences among means statistically significant? (P < 0.05)	Yes
R square	0.5764
Brown-Forsythe test
F (DFn, DFd)	11,89 (3, 116)
P value	< 0,0001
P value summary	****
Significantly different standard deviations? (P < 0.05)	Yes
Bartlett's test
Bartlett's statistic (corrected)	43.09
P value	< 0,0001
P value summary	****
Significantly different standard deviations? (P < 0.05)	Yes
ANOVA table	SS	DF	MS	F (DFn, DFd)	P value
Treatment (between columns)	14488	3	4829	F (3, 116) = 52,61	P < 0,0001
Residual (within columns)	10649	116	91.8
Total	25136	119
Bonferroni's multiple comparisons test	Mean Diff,	95% CI of diff,	Significant?	Summary	Adjusted P Value
p27+/+ si ctl vs. p27+/+ si PAK1	-12.77	-19,41 to -6,133	Yes	****	< 0,0001
p27+/+ si ctl vs. p27-/- si ctl	-27.19	-33,83 to -20,55	Yes	****	< 0,0001
p27+/+ si ctl vs. p27-/- si PAK1	-25.59	-32,23 to -18,95	Yes	****	< 0,0001
p27+/+ si PAK1 vs. p27-/- si ctl	-14.41	-21,05 to -7,773	Yes	****	< 0,0001
p27+/+ si PAK1 vs. p27-/- si PAK1	-12.82	-19,46 to -6,176	Yes	****	< 0,0001
p27-/- si ctl vs. p27-/- si PAK1	1.597	-5,044 to 8,237	No	ns	> 0,9999
Test details	Mean 1	Mean 2	Mean Diff,	SE of diff,	n1	n2	t	DF
p27+/+ si ctl vs. p27+/+ si PAK1	9.543	22.32	-12.77	2.474	30	30	5.163	116
p27+/+ si ctl vs. p27-/- si ctl	9.543	36.73	-27.19	2.474	30	30	10.99	116
p27+/+ si ctl vs. p27-/- si PAK1	9.543	35.13	-25.59	2.474	30	30	10.34	116
p27+/+ si PAK1 vs. p27-/- si ctl	22.32	36.73	-14.41	2.474	30	30	5.826	116
p27+/+ si PAK1 vs. p27-/- si PAK1	22.32	35.13	-12.82	2.474	30	30	5.181	116
p27-/- si ctl vs. p27-/- si PAK1	36.73	35.13	1.597	2.474	30	30	0.6454	116

## Sheet: Fig 6B
Figure 6B: Quantification of degraded gelatin area after PAK1 silencing
			p27+/+								p27 -/-
			si control				si PAK1				si control				si PAK1
			# cells	Sum degraded area (μm²)	Degraded per cells (μm²)	Fold change relative to p27+/+ si control	# cells	Sum degraded area (μm²)	Degraded per cells (μm²)	Fold change relative to p27+/+ si control	# cells	Sum degraded area (μm²)	Degraded per cells (μm²)	Fold change relative to p27-/- si control	# cells	Sum degraded area (μm²)	Degraded per cells (μm²)	Fold change relative to p27-/- si control
	Exp #1	Field #1									46	9241.14	200.894	1.11495	39	18379.2	471.261	2.61545
		Field #2									70	10619.4	151.706	0.841955	39	25198	646.103	3.58581
		Field #3									54	5784.74	107.125	0.594533	46	12289.5	267.163	1.48273
		Field #4									34	8605.76	253.111	1.40474	58	13594.2	234.383	1.30081
		Field #5									30	8141.87	271.396	1.50622	19	11346.6	597.189	3.31434
		Field #6									50	10505.8	210.115	1.16612	23	14926.4	648.973	3.60174
		Field #7									59	9306.61	157.739	0.875438	20	9432.51	471.625	2.61748
		Field #8									51	4490.71	88.0531	0.488687	46	21459.3	466.507	2.58907
		Field #9									59	5054.42	85.6681	0.47545	25	6223.08	248.923	1.3815
		Field #10									39	10764.9	276.024	1.53191	16	7717.59	482.349	2.677
		Mean											180.183
	Exp #2	Field #1	32	57.12	1.785	0.790813	34	213.06	6.26647	2.77625
		Field #2	23	0	0	0	36	1301.57	36.1547	16.0177
		Field #3	34	262.55	7.72206	3.42112	46	677.08	14.7191	6.52105
		Field #4	27	0	0	0	46	302.42	6.57435	2.91265
		Field #5	47	266.46	5.66936	2.51171	66	2749.79	41.6635	18.4583
		Field #6	34	0	0	0	37	234.55	6.33919	2.80847
		Field #7	36	80.13	2.22583	0.986116	34	472.35	13.8926	6.15489
		Field #8	56	179.73	3.20946	1.4219	44	1160.61	26.3775	11.6861
		Field #9	77	0	0	0	31	300.98	9.70903	4.30141
		Field #10	78	152.88	1.96	0.868343	43	968.97	22.5342	9.98337
		Mean			2.25717
	Exp #3	Field #1	40	659.02	16.4755	4.27014	105	2625.21	25.002	6.48005	71	18675.3	263.033	1.43748	57	24486.3	429.585	2.34769
		Field #2	28	70.27	2.50964	0.650453	93	1380.49	14.844	3.84728	72	3917.85	54.4146	0.297377	64	17781.9	277.842	1.51842
		Field #3	24	0	0	0	62	1248.73	20.1408	5.22012	75	10080.2	134.403	0.734517	70	14180.4	202.578	1.10709
		Field #4	24	98.86	4.11917	1.06761	52	3526.47	67.8167	17.5768	88	6229.11	70.7853	0.386844	92	10892.8	118.4	0.647057
		Field #5	43	386.67	8.99233	2.33064	65	1842.82	28.3511	7.34807	87	15086.3	173.406	0.947669	123	24715.5	200.939	1.09814
		Field #6	34	0	0	0	58	1791.49	30.8878	8.00553	81	9508.34	117.387	0.641523	100	21589.6	215.896	1.17988
		Field #7	36	128.48	3.56889	0.924989	30	2842.68	94.756	24.559	89	11269.9	126.628	0.692027	82	25184.1	307.123	1.67844
		Field #8	35	0	0	0	41	1869.95	45.6085	11.8209	64	18663.8	291.623	1.59373	84	8083	96.2262	0.525879
		Field #9	35	0	0	0	90	6944.81	77.1646	19.9996	60	9812.14	163.536	0.893727	52	36485.9	701.651	3.83454
		Field #10	52	151.71	2.9175	0.756162	67	7815.51	116.649	30.2333	64	27814.5	434.602	2.37511	70	18862.4	269.463	1.47262
		Mean			3.8583								182.982
	Exp #4	Field #1									28	16569	591.749	1.18014	22	9240.23	420.01	0.837639
		Field #2									25	16006.3	640.253	1.27688	14	1864.75	133.196	0.265637
		Field #3									41	19183.9	467.9	0.933147	22	587.63	26.7105	0.0532694
		Field #4									18	12151.3	675.07	1.34631	24	7647.28	318.637	0.635466
		Field #5									44	23110.5	525.238	1.0475	21	7258.69	345.652	0.689343
		Field #6									31	17256.3	556.655	1.11015	28	1860.82	66.4579	0.132539
		Field #7									36	10505.1	291.808	0.581961	21	3228.39	153.733	0.306594
		Field #8									53	12026	226.906	0.452525	26	862.17	33.1604	0.0661327
		Field #9									30	11490.8	383.025	0.763878	19	684.19	36.01	0.0718158
		Field #10									35	22946.5	655.614	1.30751	15	2308.46	153.897	0.306922
		Mean											501.422
	Exp #5	Field #1	78	149.89	1.92167	1.42986	30	1158.34	38.6113	28.7297
		Field #2	89	199.47	2.24124	1.66764	23	679.7	29.5522	21.989
		Field #3	49	150.78	3.07714	2.28962	29	194.54	6.70828	4.99145
		Field #4	69	97.83	1.41783	1.05497	70	919.3	13.1329	9.77181
		Field #5	68	18.56	0.272941	0.203088	61	705.46	11.5649	8.60514
		Field #6	62	95.59	1.54177	1.14719	62	743.45	11.9911	8.92228
		Field #7	80	50.36	0.6295	0.468394	35	5300.14	151.433	112.677
		Field #8	89	0	0	0	29	0	0	0
		Field #9	89	108.88	1.22337	0.910277	36	1402.75	38.9653	28.993
		Field #10	98	109.18	1.11408	0.828958	39	1806.33	46.3162	34.4626
		Mean			1.34395
ANOVA summary
F	15.23
P value	< 0,0001
P value summary	****
Are differences among means statistically significant? (P < 0.05)	Yes
R square	0.2826
Brown-Forsythe test
F (DFn, DFd)	8,396 (3, 116)
P value	< 0,0001
P value summary	****
Significantly different standard deviations? (P < 0.05)	Yes
Bartlett's test
Bartlett's statistic (corrected)	393.2
P value	< 0,0001
P value summary	****
Significantly different standard deviations? (P < 0.05)	Yes
ANOVA table	SS
Treatment (between columns)	4871
Residual (within columns)	12363
Total	17234
Bonferroni's multiple comparisons test	Mean Diff,	95% CI of diff,	Significant?	Summary	Adjusted P Value
p27+/+ si ctl vs. p27+/+ si PAK1	-14.86	-22,02 to -7,707	Yes	****	< 0,0001
p27+/+ si ctl vs. p27-/- si ctl	-1.49e-09	-7,155 to 7,155	No	ns	> 0,9999
p27+/+ si ctl vs. p27-/- si PAK1	-0.4657	-7,621 to 6,689	No	ns	> 0,9999
p27+/+ si PAK1 vs. p27-/- si ctl	14.86	7,707 to 22,02	Yes	****	< 0,0001
p27+/+ si PAK1 vs. p27-/- si PAK1	14.4	7,241 to 21,55	Yes	****	< 0,0001
p27-/- si ctl vs. p27-/- si PAK1	-0.4657	-7,621 to 6,689	No	ns	> 0,9999
Test details	Mean 1	Mean 2	Mean Diff,	SE of diff,	n1	n2	t	DF
p27+/+ si ctl vs. p27+/+ si PAK1	1	15.86	-14.86	2.666	30	30	5.576	116
p27+/+ si ctl vs. p27-/- si ctl	1	1	-1.49e-09	2.666	30	30	5.59e-10	116
p27+/+ si ctl vs. p27-/- si PAK1	1	1.466	-0.4657	2.666	30	30	0.1747	116
p27+/+ si PAK1 vs. p27-/- si ctl	15.86	1	14.86	2.666	30	30	5.576	116
p27+/+ si PAK1 vs. p27-/- si PAK1	15.86	1.466	14.4	2.666	30	30	5.401	116
p27-/- si ctl vs. p27-/- si PAK1	1	1.466	-0.4657	2.666	30	30	0.1747	116

## Sheet: Fig 6D
Figure 6D: Quantification of cells with invadopodia after FRAX597 treatment
			p27+/+						p27 -/-
			DMSO			FRAX597			DMSO			FRAX597
			# cells	# Cells with invadopodia	% of invadopodia forming cells	# cells	# Cells with invadopodia	% of invadopodia forming cells	# cells	# Cells with invadopodia	% of invadopodia forming cells	# cells	# Cells with invadopodia	% of invadopodia forming cells
	Exp #1	Field #1	32	5	15.625	19	10	52.6316	40	14	35	18	10	55.5556
		Field #2	99	7	7.07071	67	14	20.8955	55	14	25.4545	16	6	37.5
		Field #3	89	10	11.236	87	18	20.6897	67	16	23.8806	33	11	33.3333
		Field #4	51	4	7.84314	72	15	20.8333	75	19	25.3333	19	7	36.8421
		Field #5	39	5	12.8205	41	9	21.9512	77	20	25.974	19	7	36.8421
		Field #6	40	4	10	31	9	29.0323	78	19	24.359	30	5	16.6667
		Field #7	46	6	13.0435	29	10	34.4828	94	20	21.2766	24	3	12.5
		Field #8	31	3	9.67742	48	12	25	89	23	25.8427	13	5	38.4615
		Field #9	25	3	12	70	19	27.1429	90	21	23.3333	21	4	19.0476
		Field #10	18	6	33.3333	87	18	20.6897	81	18	22.2222	26	7	26.9231
	Exp #2	Field #1	28	3	10.7143	27	9	33.3333	28	13	46.4286	42	17	40.4762
		Field #2	37	3	8.10811	23	12	52.1739	31	15	48.3871	25	7	28
		Field #3	34	6	17.6471	28	10	35.7143	24	14	58.3333	27	11	40.7407
		Field #4	44	5	11.3636	45	16	35.5556	22	12	54.5455	20	10	50
		Field #5	62	10	16.129	39	15	38.4615	28	14	50	34	12	35.2941
		Field #6	40	8	20	90	37	41.1111	13	6	46.1538	38	11	28.9474
		Field #7	42	10	23.8095	118	57	48.3051	21	12	57.1429	20	8	40
		Field #8	43	8	18.6047	121	49	40.4959	29	11	37.931	16	8	50
		Field #9	41	10	24.3902	105	54	51.4286	34	15	44.1176	19	11	57.8947
		Field #10	54	8	14.8148	81	33	40.7407	37	14	37.8378	10	6	60
	Exp #3	Field #1	39	5	12.8205	33	9	27.2727	65	25	38.4615	74	14	18.9189
		Field #2	36	3	8.33333	31	10	32.2581	53	25	47.1698	57	27	47.3684
		Field #3	34	5	14.7059	35	8	22.8571	50	25	50	55	25	45.4545
		Field #4	51	5	9.80392	69	9	13.0435	51	32	62.7451	57	20	35.0877
		Field #5	55	6	10.9091	69	8	11.5942	38	23	60.5263	77	20	25.974
		Field #6	49	4	8.16327	83	14	16.8675	43	24	55.814	67	20	29.8507
		Field #7	50	6	12	84	21	25	28	15	53.5714	59	25	42.3729
		Field #8	64	4	6.25	51	8	15.6863	58	24	41.3793	44	16	36.3636
		Field #9	65	6	9.23077	58	11	18.9655	40	21	52.5	74	28	37.8378
		Field #10	83	10	12.0482	75	21	28	43	22	51.1628	87	28	32.1839
ANOVA summary
F	37
P value	< 0,0001
P value summary	****
Are differences among means statistically significant? (P < 0.05)	Yes
R square	0.489
Brown-Forsythe test
F (DFn, DFd)	6,409 (3, 116)
P value	0.0005
P value summary	***
Significantly different standard deviations? (P < 0.05)	Yes
Bartlett's test
Bartlett's statistic (corrected)	17.99
P value	0.0004
P value summary	***
Significantly different standard deviations? (P < 0.05)	Yes
ANOVA table	SS	DF	MS	F (DFn, DFd)	P value
Treatment (between columns)	13537	3	4512	F (3, 116) = 37,00	P < 0,0001
Residual (within columns)	14148	116	122
Total	27686	119
Bonferroni's multiple comparisons test	Mean Diff,	95% CI of diff,	Significant?	Summary	Adjusted P Value
p27+/+ DMSO vs. p27+/+ FRAX597	-16.67	-24,32 to -9,016	Yes	****	< 0,0001
p27+/+ DMSO vs. p27-/- DMSO	-28.15	-35,81 to -20,50	Yes	****	< 0,0001
p27+/+ DMSO vs. p27-/- FRAX597	-23.14	-30,80 to -15,49	Yes	****	< 0,0001
p27+/+ FRAX597 vs. p27-/- DMSO	-11.48	-19,14 to -3,829	Yes	***	0.0006
p27+/+ FRAX597 vs. p27-/- FRAX597	-6.473	-14,13 to 1,181	No	ns	0.1503
p27-/- DMSO vs. p27-/- FRAX597	5.01	-2,644 to 12,66	No	ns	0.4894
Test details	Mean 1	Mean 2	Mean Diff,	SE of diff,	n1	n2	t	DF
p27+/+ DMSO vs. p27+/+ FRAX597	13.41	30.08	-16.67	2.852	30	30	5.846	116
p27+/+ DMSO vs. p27-/- DMSO	13.41	41.56	-28.15	2.852	30	30	9.873	116
p27+/+ DMSO vs. p27-/- FRAX597	13.41	36.55	-23.14	2.852	30	30	8.116	116
p27+/+ FRAX597 vs. p27-/- DMSO	30.08	41.56	-11.48	2.852	30	30	4.027	116
p27+/+ FRAX597 vs. p27-/- FRAX597	30.08	36.55	-6.473	2.852	30	30	2.27	116
p27-/- DMSO vs. p27-/- FRAX597	41.56	36.55	5.01	2.852	30	30	1.757	116

## Sheet: Fig 6E
Figure 6E : Quantification of degraded area per cells after treatment with FRAX597
			p27+/+								p27 -/-
			DMSO				FRAX597				DMSO				FRAX597
			# cells	Sum degraded area (μm²)	Degraded per cells (μm²)	Fold change relative to p27+/+ DMSO	# cells	Sum degraded area (μm²)	Degraded per cells (μm²)	Fold change relative to p27+/+ DMSO	# cells	Sum degraded area (μm²)	Degraded per cells (μm²)	Fold change relative to p27-/- DMSO	# cells	Sum degraded area (μm²)	Degraded per cells (μm²)	Fold change relative to p27-/- DMSO
	Exp #1	Field #1	32	1323.87	41.3709	2.32063	19	3434.44	180.76	10.1394	40	21299.5	532.486	3.28293	18	6296.22	349.79	2.15655
		Field #2	99	326.61	3.29909	0.185056	67	5510.37	82.2443	4.61334	55	4369.03	79.4369	0.489751	16	2136.16	133.51	0.823126
		Field #3	89	590.71	6.63719	0.372301	87	4617.95	53.0799	2.97742	67	8720.5	130.157	0.802452	33	15693.3	475.555	2.93193
		Field #4	51	0	0	0	72	8364.92	116.179	6.51687	75	10692.2	142.563	0.878938	19	8371.07	440.583	2.71631
		Field #5	39	121.05	3.10385	0.174104	41	10916.7	266.262	14.9355	77	6825.5	88.6429	0.546508	19	6667.53	350.923	2.16354
		Field #6	40	624.86	15.6215	0.876259	31	5174.84	166.93	9.36365	78	21099.3	270.504	1.66773	30	13280.8	442.692	2.72932
		Field #7	46	764.98	16.63	0.932829	29	4697.55	161.984	9.08622	94	8750.28	93.0881	0.573914	24	2264.29	94.3454	0.581666
		Field #8	31	2132.09	68.7771	3.85792	48	2273.91	47.3731	2.65731	89	10476	117.707	0.725699	13	0	0	0
		Field #9	25	299.59	11.9836	0.672198	70	4721.06	67.4437	3.78313	90	6386.76	70.964	0.437513	21	1123.85	53.5167	0.329945
		Field #10	18	195.33	10.8517	0.608704	87	1002.49	11.5229	0.646354	81	7811.47	96.4379	0.594566	26	5392.83	207.417	1.27878
		Mean			17.8275								162.199
	Exp #2	Field #1	28	589.1	21.0393	2.59547	27	1086.17	40.2285	4.96272	28	36121.2	1290.04	1.70717	42	121513	2893.16	3.82865
		Field #2	37	191.84	5.18486	0.639621	23	2834.87	123.255	15.2052	31	31732.5	1023.63	1.35462	25	41555.4	1662.22	2.19969
		Field #3	34	97.18	2.85824	0.352601	28	1682.02	60.0721	7.41069	24	10885.4	453.559	0.600216	27	58286.4	2158.76	2.85678
		Field #4	44	0	0	0	45	7164.96	159.221	19.6421	22	6865.23	312.056	0.412958	20	42213.7	2110.68	2.79316
		Field #5	62	120.37	1.94145	0.239504	39	3004.33	77.0341	9.50317	28	24854.5	887.659	1.17468	34	57982.5	1705.37	2.25679
		Field #6	40	161.6	4.04	0.498387	90	19403.1	215.59	26.5959	13	14354.4	1104.18	1.46122	38	53840.5	1416.85	1.87499
		Field #7	42	1931.9	45.9976	5.67441	118	13677.3	115.909	14.2989	21	26032.2	1239.63	1.64046	20	33188.8	1659.44	2.19601
		Field #8	43	0	0	0	121	12316.8	101.792	12.5574	29	10323.2	355.972	0.471074	16	13835.4	864.714	1.14432
		Field #9	41	0	0	0	105	4118.82	39.2269	4.83915	34	12842.9	377.733	0.499871	19	15652.6	823.819	1.0902
		Field #10	54	0	0	0	81	4330.51	53.4631	6.59538	37	18949.1	512.139	0.677737	10	6528.24	652.824	0.863912
		Mean			8.10615								755.66
	Exp #3	Field #1	31	312.64	10.0852	1.29412	36	2572.18	71.4494	9.16836	34	3916.67	115.196	0.711151	31	0	0	0
		Field #2	37	0	0	0	47	2638.85	56.1457	7.20459	27	4117.64	152.505	0.941473	26	0	0	0
		Field #3	39	0	0	0	56	6868.02	122.643	15.7375	25	10133.5	405.342	2.50233	31	2297.29	74.1061	0.457486
		Field #4	33	0	0	0	43	2155.35	50.1244	6.43194	33	2283.98	69.2115	0.427269	26	3649.9	140.381	0.866625
		Field #5	21	0	0	0	30	1893.16	63.1053	8.09765	34	2970.6	87.3706	0.539372	37	4598.34	124.279	0.767225
		Field #6	21	190.83	9.08714	1.16606	40	3178.81	79.4703	10.1976	26	13753.7	528.988	3.26565	32	2131.87	66.6209	0.411277
		Field #7	17	481.51	28.3241	3.63454	34	7867.82	231.406	29.694	29	2344.73	80.8528	0.499135	17	3688.09	216.946	1.33929
		Field #8	21	119.87	5.7081	0.73246	54	4806.83	89.0154	11.4224	43	2423.72	56.3656	0.347967	37	1302.04	35.1903	0.217243
		Field #9	55	297.38	5.40691	0.693812	79	3221.45	40.7778	5.23259	45	2911.04	64.6898	0.399355	26	4790.15	184.237	1.13736
		Field #10	42	811.4	19.319	2.47901	66	2633.12	39.8958	5.1194	41	2432.71	59.3344	0.366294	31	3564.6	114.987	0.70986
		Mean			7.79305								161.986
	Exp #4	Field #1	39	0	0	0	33	7976.44	241.71	23.9426	65	17500.2	269.234	1.02406	74	4809.56	64.9941	0.247213
		Field #2	36	334.99	9.30528	0.921732	31	3452.7	111.377	11.0325	53	10358.7	195.446	0.743403	57	6252.5	109.693	0.41723
		Field #3	34	1361.95	40.0574	3.96787	35	9653.74	275.821	27.3214	50	16991.2	339.823	1.29256	55	5311.26	96.5684	0.367309
		Field #4	51	313.94	6.15569	0.60975	69	4894.09	70.9288	7.02584	51	12962	254.157	0.966715	57	2429.44	42.6218	0.162117
		Field #5	55	0	0	0	69	4081.17	59.1474	5.85883	38	12758.1	335.74	1.27703	77	6170.9	80.1416	0.304828
		Field #6	49	0	0	0	83	6174.02	74.3858	7.36827	43	11945.2	277.796	1.05663	67	5260.05	78.5082	0.298615
		Field #7	50	1104.14	22.0828	2.18741	84	14181.8	168.831	16.7235	28	8795.13	314.112	1.19476	59	7158.61	121.332	0.461502
		Field #8	64	1332.89	20.8264	2.06295	51	3317.98	65.0584	6.44435	58	14964.1	258.002	0.981341	44	3206.35	72.8716	0.277176
		Field #9	65	0	0	0	58	8663.99	149.379	14.7967	40	5201.13	130.028	0.494578	74	9082.91	122.742	0.466864
		Field #10	83	209.72	2.52675	0.250286	75	4354.13	58.0551	5.75063	43	10953.8	254.738	0.968927	87	11896.7	136.743	0.520119
		Mean			10.0954								262.908
ANOVA summary
F	68.94
P value	< 0,0001
P value summary	****
Are differences among means statistically significant? (P < 0.05)	Yes
R square	0.57
Brown-Forsythe test
F (DFn, DFd)	26,46 (3, 156)
P value	< 0,0001
P value summary	****
Significantly different standard deviations? (P < 0.05)	Yes
Bartlett's test
Bartlett's statistic (corrected)	247.7
P value	< 0,0001
P value summary	****
Significantly different standard deviations? (P < 0.05)	Yes
ANOVA table	SS	DF	MS	F (DFn, DFd)	P value
Treatment (between columns)	2692	3	897.2	F (3, 156) = 68,94	P < 0,0001
Residual (within columns)	2030	156	13.01
Total	4722	159
Bonferroni's multiple comparisons test	Mean Diff,	95% CI of diff,	Significant?	Summary	Adjusted P Value
p27+/+ DMSO vs. p27+/+ FRAX597	-9.523	-11,68 to -7,367	Yes	****	< 0,0001
p27+/+ DMSO vs. p27-/- DMSO	-1.49e-09	-2,156 to 2,156	No	ns	> 0,9999
p27+/+ DMSO vs. p27-/- FRAX597	-0.1568	-2,312 to 1,999	No	ns	> 0,9999
p27+/+ FRAX597 vs. p27-/- DMSO	9.523	7,367 to 11,68	Yes	****	< 0,0001
p27+/+ FRAX597 vs. p27-/- FRAX597	9.366	7,211 to 11,52	Yes	****	< 0,0001
p27-/- DMSO vs. p27-/- FRAX597	-0.1568	-2,312 to 1,999	No	ns	> 0,9999
Test details	Mean 1	Mean 2	Mean Diff,	SE of diff,	n1	n2	t	DF
p27+/+ DMSO vs. p27+/+ FRAX597	0.9998	10.52	-9.523	0.8066	40	40	11.81	156
p27+/+ DMSO vs. p27-/- DMSO	0.9998	0.9998	-1.49e-09	0.8066	40	40	1.847e-09	156
p27+/+ DMSO vs. p27-/- FRAX597	0.9998	1.157	-0.1568	0.8066	40	40	0.1943	156
p27+/+ FRAX597 vs. p27-/- DMSO	10.52	0.9998	9.523	0.8066	40	40	11.81	156
p27+/+ FRAX597 vs. p27-/- FRAX597	10.52	1.157	9.366	0.8066	40	40	11.61	156
p27-/- DMSO vs. p27-/- FRAX597	0.9998	1.157	-0.1568	0.8066	40	40	0.1943	156

## Sheet: Fig 6 supp1A
Figure 6 supp 1A: Quantification of cells with invadopodia after FRAX1036 and G-5555 treatment
			p27+/+									p27 -/-
			DMSO			FRAX1036			G-5555			DMSO			FRAX1036			G-5555
			# cells	# Cells with invadopodia	% of invadopodia forming cells	# cells	# Cells with invadopodia	% of invadopodia forming cells	# cells	# Cells with invadopodia	% of invadopodia forming cells	# cells	# Cells with invadopodia	% of invadopodia forming cells	# cells	# Cells with invadopodia	% of invadopodia forming cells	# cells	# Cells with invadopodia	% of invadopodia forming cells
	Exp #1	Field #1	12	2	16.6667	34	7	20.5882	32	8	25	11	5	45.4545	12	5	41.6667	14	9	64.2857
		Field #2	31	4	12.9032	50	15	30	22	9	40.9091	12	3	25	16	6	37.5	22	11	50
		Field #3	30	1	3.33333	18	4	22.2222	18	5	27.7778	15	3	20	16	7	43.75	18	5	27.7778
		Field #4	12	0	0	19	4	21.0526	22	8	36.3636	20	8	40	25	11	44	19	10	52.6316
		Field #5	13	1	7.69231	36	8	22.2222	52	11	21.1538	16	4	25	17	8	47.0588	19	8	42.1053
		Field #6	18	1	5.55556	99	16	16.1616	72	12	16.6667	16	3	18.75	15	7	46.6667	23	8	34.7826
		Field #7	15	3	20	22	5	22.7273	42	9	21.4286	23	8	34.7826	21	13	61.9048	12	5	41.6667
		Field #8	15	2	13.3333	15	6	40	34	6	17.6471	20	7	35	13	6	46.1538	18	10	55.5556
		Field #9	20	2	10	28	6	21.4286	17	5	29.4118	20	9	45	21	7	33.3333	15	5	33.3333
		Field #10	28	3	10.7143	12	4	33.3333	35	12	34.2857	17	9	52.9412	12	7	58.3333	18	6	33.3333
	Exp #2	Field #1										39	17	43.5897	47	13	27.6596	31	9	29.0323
		Field #2										41	13	31.7073	41	10	24.3902	33	13	39.3939
		Field #3										35	12	34.2857	52	20	38.4615	29	8	27.5862
		Field #4										36	18	50	34	12	35.2941	32	13	40.625
		Field #5										40	17	42.5	43	14	32.5581	48	18	37.5
		Field #6										59	29	49.1525	44	15	34.0909	36	13	36.1111
		Field #7										40	15	37.5	51	17	33.3333	41	15	36.5854
		Field #8										48	14	29.1667	36	13	36.1111	46	21	45.6522
		Field #9										26	9	34.6154	16	6	37.5	40	17	42.5
		Field #10										26	8	30.7692	26	9	34.6154	43	19	44.186
	Exp #3	Field #1	34	4	11.7647	59	19	32.2034	55	14	25.4545
		Field #2	26	4	15.3846	43	9	20.9302	50	17	34
		Field #3	27	4	14.8148	30	5	16.6667	16	5	31.25
		Field #4	49	6	12.2449	47	15	31.9149	42	12	28.5714
		Field #5	29	5	17.2414	41	9	21.9512	75	21	28
		Field #6	51	7	13.7255	49	15	30.6122	54	17	31.4815
		Field #7	31	4	12.9032	45	14	31.1111	58	17	29.3103
		Field #8	78	9	11.5385	60	15	25	40	18	45
		Field #9	51	6	11.7647	50	20	40	24	10	41.6667
		Field #10	56	7	12.5	35	10	28.5714	60	23	38.3333
	Exp #4	Field #1	26	3	11.5385	30	6	20	23	9	39.1304
		Field #2	43	4	9.30233	21	9	42.8571	25	8	32
		Field #3	60	7	11.6667	43	10	23.2558	22	8	36.3636
		Field #4	52	6	11.5385	44	14	31.8182	22	6	27.2727
		Field #5	36	6	16.6667	35	15	42.8571	31	15	48.3871
		Field #6	27	3	11.1111	33	10	30.303	18	7	38.8889
		Field #7	38	1	2.63158	43	18	41.8605	25	7	28
		Field #8	35	3	8.57143	42	22	52.381	27	10	37.037
		Field #9	42	3	7.14286	34	11	32.3529	27	6	22.2222
		Field #10	33	6	18.1818	35	9	25.7143	34	11	32.3529
	Exp #5	Field #1										39	19	48.7179	46	17	36.9565	26	12	46.1538
		Field #2										39	20	51.2821	50	25	50	34	17	50
		Field #3										59	28	47.4576	42	19	45.2381	35	15	42.8571
		Field #4										47	22	46.8085	70	26	37.1429	42	22	52.381
		Field #5										47	22	46.8085	57	22	38.5965	36	13	36.1111
		Field #6										46	26	56.5217	55	26	47.2727	39	15	38.4615
		Field #7										37	22	59.4595	67	23	34.3284	41	21	51.2195
		Field #8										50	28	56	61	27	44.2623	41	19	46.3415
		Field #9										32	15	46.875	56	18	32.1429	35	18	51.4286
		Field #10										44	25	56.8182	51	13	25.4902	29	12	41.3793
ANOVA summary
F	49.1
P value	< 0,0001
P value summary	****
Are differences among means statistically significant? (P < 0.05)	Yes
R square	0.5852
Brown-Forsythe test
F (DFn, DFd)	4,798 (5, 174)
P value	0.0004
P value summary	***
Significantly different standard deviations? (P < 0.05)	Yes
Bartlett's test
Bartlett's statistic (corrected)	29.96
P value	< 0,0001
P value summary	****
Significantly different standard deviations? (P < 0.05)	Yes
ANOVA table	SS	DF	MS	F (DFn, DFd)	P value
Treatment (between columns)	19885	5	3977	F (5, 174) = 49,10	P < 0,0001
Residual (within columns)	14094	174	81
Total	33979	179
Bonferroni's multiple comparisons test	Mean Diff,	95% CI of diff,	Significant?	Summary	Adjusted P Value
p27+/+ DMSO vs. p27+/+ FRAX1036	-17.67	-24,58 to -10,75	Yes	****	< 0,0001
p27+/+ DMSO vs. p27+/+ G-5555	-20.11	-27,03 to -13,19	Yes	****	< 0,0001
p27+/+ DMSO vs. p27-/- DMSO	-28.75	-35,66 to -21,83	Yes	****	< 0,0001
p27+/+ DMSO vs. p27-/- FRAX1036	-28.12	-35,04 to -21,21	Yes	****	< 0,0001
p27+/+ DMSO vs. p27-/- G-5555	-30.96	-37,88 to -24,04	Yes	****	< 0,0001
p27+/+ FRAX1036 vs. p27+/+ G-5555	-2.443	-9,360 to 4,473	No	ns	> 0,9999
p27+/+ FRAX1036 vs. p27-/- DMSO	-11.08	-18,00 to -4,164	Yes	****	< 0,0001
p27+/+ FRAX1036 vs. p27-/- FRAX1036	-10.46	-17,37 to -3,540	Yes	***	0.0002
p27+/+ FRAX1036 vs. p27-/- G-5555	-13.29	-20,21 to -6,377	Yes	****	< 0,0001
p27+/+ G-5555 vs. p27-/- DMSO	-8.637	-15,55 to -1,720	Yes	**	0.0041
p27+/+ G-5555 vs. p27-/- FRAX1036	-8.013	-14,93 to -1,097	Yes	*	0.0106
p27+/+ G-5555 vs. p27-/- G-5555	-10.85	-17,77 to -3,934	Yes	****	< 0,0001
p27-/- DMSO vs. p27-/- FRAX1036	0.6233	-6,293 to 7,540	No	ns	> 0,9999
p27-/- DMSO vs. p27-/- G-5555	-2.213	-9,130 to 4,703	No	ns	> 0,9999
p27-/- FRAX1036 vs. p27-/- G-5555	-2.837	-9,753 to 4,080	No	ns	> 0,9999
Test details	Mean 1	Mean 2	Mean Diff,	SE of diff,	n1	n2	t	DF
p27+/+ DMSO vs. p27+/+ FRAX1036	11.41	29.08	-17.67	2.324	30	30	7.602	174
p27+/+ DMSO vs. p27+/+ G-5555	11.41	31.52	-20.11	2.324	30	30	8.654	174
p27+/+ DMSO vs. p27-/- DMSO	11.41	40.16	-28.75	2.324	30	30	12.37	174
p27+/+ DMSO vs. p27-/- FRAX1036	11.41	39.53	-28.12	2.324	30	30	12.1	174
p27+/+ DMSO vs. p27-/- G-5555	11.41	42.37	-30.96	2.324	30	30	13.32	174
p27+/+ FRAX1036 vs. p27+/+ G-5555	29.08	31.52	-2.443	2.324	30	30	1.051	174
p27+/+ FRAX1036 vs. p27-/- DMSO	29.08	40.16	-11.08	2.324	30	30	4.768	174
p27+/+ FRAX1036 vs. p27-/- FRAX1036	29.08	39.53	-10.46	2.324	30	30	4.5	174
p27+/+ FRAX1036 vs. p27-/- G-5555	29.08	42.37	-13.29	2.324	30	30	5.72	174
p27+/+ G-5555 vs. p27-/- DMSO	31.52	40.16	-8.637	2.324	30	30	3.717	174
p27+/+ G-5555 vs. p27-/- FRAX1036	31.52	39.53	-8.013	2.324	30	30	3.448	174
p27+/+ G-5555 vs. p27-/- G-5555	31.52	42.37	-10.85	2.324	30	30	4.669	174
p27-/- DMSO vs. p27-/- FRAX1036	40.16	39.53	0.6233	2.324	30	30	0.2682	174
p27-/- DMSO vs. p27-/- G-5555	40.16	42.37	-2.213	2.324	30	30	0.9525	174
p27-/- FRAX1036 vs. p27-/- G-5555	39.53	42.37	-2.837	2.324	30	30	1.221	174

## Sheet: Fig 6 supp 1B
Figure 6 supp 1B: Quantification of degraded gelatin area after FRAX1036 and G-5555 treatment
			p27+/+												p27 -/-
			DMSO				FRAX1036				G-5555				DMSO				FRAX1036				G-5555
			# cells	Sum degraded area (μm²)	Degraded per cells (μm²)	Fold change relative to p27+/+ DMSO	# cells	Sum degraded area (μm²)	Degraded per cells (μm²)	Fold change relative to p27+/+ DMSO	# cells	Sum degraded area (μm²)	Degraded per cells (μm²)	Fold change relative to p27+/+ DMSO	# cells	Sum degraded area (μm²)	Degraded per cells (μm²)	Fold change relative to p27-/- DMSO	# cells	Sum degraded area (μm²)	Degraded per cells (μm²)	Fold change relative to p27-/- DMSO	# cells	Sum degraded area (μm²)	Degraded per cells (μm²)	Fold change relative to p27-/- DMSO
	Exp #1	Field #1	12	176.76	14.73	3.68953	34	1726.75	50.7868	12.7209	32	1721.95	53.8109	13.4784	11	2150.81	195.528	1.01537	12	1504.66	125.388	0.651136	14	8258.95	589.925	3.06346
		Field #2	31	0	0	0	50	1879.9	37.598	9.41745	22	1314.25	59.7386	14.9632	12	1624.65	135.387	0.703062	16	5139.97	321.248	1.66823	22	767.93	34.9059	0.181265
		Field #3	30	320.27	10.6757	2.67401	18	1145.16	63.62	15.9354	18	577.94	32.1078	8.04227	15	3528.52	235.235	1.22156	16	2429.5	151.844	0.788518	18	1766.99	98.1661	0.509773
		Field #4	12	0	0	0	19	1984.38	104.441	26.1601	22	2204.19	100.19	25.0954	20	7428.88	371.444	1.92889	25	4191.89	167.676	0.870733	19	791.23	41.6437	0.216254
		Field #5	13	0	0	0	36	1656.53	46.0147	11.5256	52	1000.98	19.2496	4.82159	16	905.14	56.5712	0.293772	17	3210.58	188.858	0.98073	19	660.78	34.7779	0.1806
		Field #6	18	69.37	3.85389	0.965312	99	2752.15	27.7995	6.96314	72	2128.43	29.5615	7.40449	16	733.76	45.86	0.238149	15	3647.98	243.199	1.26292	23	2327.2	101.183	0.525437
		Field #7	15	0	0	0	22	914.87	41.585	10.4161	42	844.42	20.1052	5.03591	23	6531.2	283.965	1.47462	21	4517.74	215.13	1.11716	12	4920.17	410.014	2.12919
		Field #8	15	0	0	0	15	1007.49	67.166	16.8236	34	1923.96	56.5871	14.1738	20	539.63	26.9815	0.140114	13	1021.23	78.5562	0.407939	18	4693.23	260.735	1.35399
		Field #9	20	67.27	3.3635	0.842481	28	1100.3	39.2964	9.84287	17	1219.52	71.7365	17.9684	20	9324.9	466.245	2.42119	21	2091.65	99.6024	0.517231	15	5025.67	335.045	1.73987
		Field #10	28	204.42	7.30071	1.82866	12	253.63	21.1358	5.29405	35	1593.11	45.5174	11.4011	17	1843.94	108.467	0.563265	12	1984.34	165.362	0.858716	18	5459.34	303.297	1.57501
					3.99238												192.568
	Exp #2	Field #1													39	3062.57	78.5274	0.469392	47	3007.65	63.9926	0.382511	31	4710.31	151.945	0.908243
		Field #2													41	1418.34	34.5937	0.206781	41	1643.05	40.0744	0.239542	33	2943.35	89.1924	0.533141
		Field #3													35	2846.2	81.32	0.486085	52	3875.02	74.5196	0.445436	29	1479.74	51.0255	0.305001
		Field #4													36	9979.7	277.214	1.65703	34	2321.22	68.2712	0.408086	32	5062.73	158.21	0.945691
		Field #5													40	8093.54	202.339	1.20946	43	3101.82	72.1353	0.431184	48	5858.11	122.044	0.729509
		Field #6													59	3408.07	57.7639	0.34528	44	5121.03	116.387	0.695695	36	6828.81	189.689	1.13385
		Field #7													40	4614.82	115.371	0.689619	51	3901.16	76.4933	0.457233	41	820.95	20.0232	0.119687
		Field #8													48	12595.4	262.403	1.5685	36	1031.26	28.6461	0.17123	46	9282.32	201.79	1.20618
		Field #9													26	5723.5	220.135	1.31584	16	1894.67	118.417	0.707828	40	6831.99	170.8	1.02094
		Field #10													26	8925.65	343.294	2.05202	26	1048.44	40.3246	0.241038	43	3141.33	73.0542	0.436676
																	167.296
	Exp #3	Field #1	34	96.69	2.84382	2.03184	59	1169.86	19.8281	14.1667	55	2250.25	40.9136	29.2317
		Field #2	26	31.26	1.20231	0.859016	43	611.89	14.23	10.167	50	1634.76	32.6952	23.3598
		Field #3	27	105.43	3.90481	2.78988	30	320.04	10.668	7.622	16	438.54	27.4088	19.5828
		Field #4	49	0	0	0	47	220.91	4.70021	3.35818	42	806.03	19.1912	13.7116
		Field #5	29	25.48	0.878621	0.627751	41	1573.22	38.3712	27.4152	75	1445.16	19.2688	13.767
		Field #6	51	68.46	1.34235	0.959075	49	602.28	12.2914	8.78189	54	785.53	14.5469	10.3933
		Field #7	31	71.44	2.30452	1.64651	45	40.22	0.893778	0.63858	58	2554.08	44.0359	31.4624
		Field #8	78	68.98	0.884359	0.631851	60	667.02	11.117	7.9428	40	1097.57	27.4392	19.6046
		Field #9	51	0	0	0	50	997.46	19.9492	14.2532	24	594.05	24.7521	17.6847
		Field #10	56	35.59	0.635536	0.454073	35	771.66	22.0474	15.7523	60	5750.38	95.8397	68.4749
					1.39963
	Exp #4	Field #1	26	43.97	1.69115	0.726412	30	1054.04	35.1347	15.0916	23	1363.21	59.27	25.4586
		Field #2	43	143.62	3.34	1.43465	21	6035.92	287.425	123.459	25	517.19	20.6876	8.88608
		Field #3	60	189.92	3.16533	1.35963	43	1505.84	35.0195	15.0422	22	159.97	7.27136	3.12331
		Field #4	52	0	0	0	44	1670.81	37.973	16.3108	22	631.79	28.7177	12.3353
		Field #5	36	173.09	4.80806	2.06523	35	631.34	18.0383	7.7481	31	1255.26	40.4923	17.3929
		Field #6	27	103.39	3.82926	1.64481	33	1042.9	31.603	13.5746	18	427.9	23.7722	10.211
		Field #7	38	79.6	2.09474	0.899765	43	783.33	18.217	7.82485	25	283.13	11.3252	4.86458
		Field #8	35	0	0	0	42	500.53	11.9174	5.11895	27	3572.14	132.301	56.8283
		Field #9	42	96.14	2.28905	0.983229	34	586.36	17.2459	7.40773	27	2737.66	101.395	43.5528
		Field #10	33	68.09	2.06333	0.886277	35	2107.53	60.2151	25.8646	34	1291.69	37.9909	16.3185
					2.32809
	Exp #5	Field #1													39	5295.22	135.775	0.561865	46	6673.84	145.083	0.600386	26	5458.04	209.925	0.868712
		Field #2													39	5286.3	135.546	0.560918	50	6363.91	127.278	0.526704	34	2621.52	77.1035	0.31907
		Field #3													59	14291.3	242.225	1.00238	42	9990.58	237.871	0.984359	35	4305.09	123.003	0.50901
		Field #4													47	16713.2	355.6	1.47155	70	5574.74	79.6391	0.329563	42	6613.95	157.475	0.651664
		Field #5													47	5231.47	111.308	0.460615	57	4044.56	70.9572	0.293636	36	4030.78	111.966	0.463339
		Field #6													46	9056.55	196.882	0.814737	55	3162.69	57.5035	0.237961	39	9547.42	244.806	1.01306
		Field #7													37	21077.8	569.67	2.35741	67	6960.36	103.886	0.429902	41	4052.41	98.8393	0.409017
		Field #8													50	3732.82	74.6564	0.308944	61	4411.37	72.3175	0.299265	41	6816.47	166.255	0.687999
		Field #9													32	12090.9	377.841	1.56358	56	6259.42	111.775	0.46255	35	4471.32	127.752	0.528664
		Field #10													44	9548.09	217.002	0.898	51	7133.92	139.881	0.578856	29	6645.14	229.143	0.94824
																	241.651
ANOVA summary
F	19.46
P value	< 0,0001
P value summary	****
Are differences among means statistically significant? (P < 0.05)	Yes
R square	0.3587
Brown-Forsythe test
F (DFn, DFd)	6,316 (5, 174)
P value	< 0,0001
P value summary	****
Significantly different standard deviations? (P < 0.05)	Yes
Bartlett's test
Bartlett's statistic (corrected)	575.5
P value	< 0,0001
P value summary	****
Significantly different standard deviations? (P < 0.05)	Yes
ANOVA table	SS
Treatment (between columns)	11006
Residual (within columns)	19678
Total	30684
Number of families	1
Number of comparisons per family	15
Alpha	0.05
Tukey's multiple comparisons test	Mean Diff,	95% CI of diff,	Significant?	Summary	Adjusted P Value
p27+/+ DMSO vs. p27+/+ FRAX1036	-14.75	-22,67 to -6,842	Yes	****	< 0,0001
p27+/+ DMSO vs. p27+/+ G-5555	-17.95	-25,87 to -10,04	Yes	****	< 0,0001
p27+/+ DMSO vs. p27-/- DMSO	-0.1	-8,013 to 7,813	No	ns	> 0,9999
p27+/+ DMSO vs. p27-/- FRAX1036	0.398	-7,515 to 8,311	No	ns	> 0,9999
p27+/+ DMSO vs. p27-/- G-5555	0.159	-7,754 to 8,072	No	ns	> 0,9999
p27+/+ FRAX1036 vs. p27+/+ G-5555	-3.199	-11,11 to 4,714	No	ns	0.8528
p27+/+ FRAX1036 vs. p27-/- DMSO	14.65	6,742 to 22,57	Yes	****	< 0,0001
p27+/+ FRAX1036 vs. p27-/- FRAX1036	15.15	7,240 to 23,07	Yes	****	< 0,0001
p27+/+ FRAX1036 vs. p27-/- G-5555	14.91	7,001 to 22,83	Yes	****	< 0,0001
p27+/+ G-5555 vs. p27-/- DMSO	17.85	9,941 to 25,77	Yes	****	< 0,0001
p27+/+ G-5555 vs. p27-/- FRAX1036	18.35	10,44 to 26,26	Yes	****	< 0,0001
p27+/+ G-5555 vs. p27-/- G-5555	18.11	10,20 to 26,03	Yes	****	< 0,0001
p27-/- DMSO vs. p27-/- FRAX1036	0.498	-7,415 to 8,411	No	ns	> 0,9999
p27-/- DMSO vs. p27-/- G-5555	0.259	-7,654 to 8,172	No	ns	> 0,9999
p27-/- FRAX1036 vs. p27-/- G-5555	-0.239	-8,152 to 7,674	No	ns	> 0,9999
Test details	Mean 1	Mean 2	Mean Diff,	SE of diff,	n1	n2	q	DF
p27+/+ DMSO vs. p27+/+ FRAX1036	1	15.75	-14.75	2.746	30	30	7.599	174
p27+/+ DMSO vs. p27+/+ G-5555	1	18.95	-17.95	2.746	30	30	9.247	174
p27+/+ DMSO vs. p27-/- DMSO	1	1.1	-0.1	2.746	30	30	0.0515	174
p27+/+ DMSO vs. p27-/- FRAX1036	1	0.602	0.398	2.746	30	30	0.205	174
p27+/+ DMSO vs. p27-/- G-5555	1	0.841	0.159	2.746	30	30	0.08189	174
p27+/+ FRAX1036 vs. p27+/+ G-5555	15.75	18.95	-3.199	2.746	30	30	1.648	174
p27+/+ FRAX1036 vs. p27-/- DMSO	15.75	1.1	14.65	2.746	30	30	7.548	174
p27+/+ FRAX1036 vs. p27-/- FRAX1036	15.75	0.602	15.15	2.746	30	30	7.804	174
p27+/+ FRAX1036 vs. p27-/- G-5555	15.75	0.841	14.91	2.746	30	30	7.681	174
p27+/+ G-5555 vs. p27-/- DMSO	18.95	1.1	17.85	2.746	30	30	9.195	174
p27+/+ G-5555 vs. p27-/- FRAX1036	18.95	0.602	18.35	2.746	30	30	9.452	174
p27+/+ G-5555 vs. p27-/- G-5555	18.95	0.841	18.11	2.746	30	30	9.329	174
p27-/- DMSO vs. p27-/- FRAX1036	1.1	0.602	0.498	2.746	30	30	0.2565	174
p27-/- DMSO vs. p27-/- G-5555	1.1	0.841	0.259	2.746	30	30	0.1334	174
p27-/- FRAX1036 vs. p27-/- G-5555	0.602	0.841	-0.239	2.746	30	30	0.1231	174
