# Supplementary material for: p27Kip1 promotes invadopodia turnover and invasion through the regulation of the PAK1/Cortactin pathway
Source: eLife. 2017 Mar 13;6:e22207. doi: 10.7554/eLife.22207 (PMC5388532; doi:10.7554/eLife.22207)
Supplement: Figure 7—source data 1. — DOI: http://dx.doi.org/10.7554/eLife.22207.029 [file elife-22207-fig7-data1.xlsx]

## Sheet: Fig 7A
Figure 7A: Quantification of Rac1 GTP/Rac1 level
			p27+/+ #1	p27+/+ #2	p27-/- #1	p27-/- #2
	Exp #1	Pull down Rac1 GTP	22215		19619	16310
		Level of Rac1	15495		21830	20811
		Ratio	1.43369		0.898717	0.78372
		Fold change	1		0.626857	0.546646
	Exp #2	Pull down Rac1 GTP	4973	13559	11163	9050
		Level of Rac1	11954	23723	26977	28626
		Ratio	0.416011	0.571555	0.413797	0.316146
		Fold change	0.842498	1.1575	0.838013	0.640253
	Exp #3	Pull down Rac1 GTP	19463	11127	17205	14131
		Level of Rac1	44387	39226	33777	29162
		Ratio	0.438484	0.283664	0.50937	0.484569
		Fold change	1.21439	0.785611	1.41071	1.34202
	Exp #4	Pull down Rac1 GTP	28265	19996	22920	13244
		Level of Rac1	21642	20780	11982	20982
		Ratio	1.30603	0.962271	1.91287	0.631208
		Fold change	1.15155	0.848453	1.68661	0.556548
	Exp #5	Pull down Rac1 GTP	15862	11286	18689	21062
		Level of Rac1	20057	18937	16025	22819
		Ratio	0.790846	0.595976	1.16624	0.923003
		Fold change	1.14052	0.859485	1.68189	1.3311
	Exp #6	Pull down Rac1 GTP	13184	12247	3560	21037
		Level of Rac1	20025	27313	21527	30820
		Ratio	0.658377	0.448395	0.165374	0.682576
		Fold change	1.18973	0.810275	0.29884	1.23345
Unpaired t test
P value	0.9148
P value summary	ns
Significantly different? (P < 0.05)	No
One- or two-tailed P value?	Two-tailed
t, df	t=0,1083 df=21
How big is the difference?
Mean ± SEM of column A	1,000 ± 0,05186 N=11
Mean ± SEM of column B	1,017 ± 0,1392 N=12
Difference between means	0,01667 ± 0,1539
95% confidence interval	-0,3034 to 0,3367
R square	0.0005581
F test to compare variances
F,DFn, Dfd	7,864, 11, 10
P value	0.0029
P value summary	**
Significantly different? (P < 0.05)	Yes

## Sheet: Fig 7B
Figure 7B: Quantification of invadopodia forming cells after silencing of Rac1
			p27+/+									p27 -/-
			si control			si Rac1 #1			si Rac1 #2			si control			si Rac1 #1			si Rac1 #2
			# cells	# Cells with invadopodia	% of invadopodia forming cells	# cells	# Cells with invadopodia	% of invadopodia forming cells	# cells	# Cells with invadopodia	% of invadopodia forming cells	# cells	# Cells with invadopodia	% of invadopodia forming cells	# cells	# Cells with invadopodia	% of invadopodia forming cells	# cells	# Cells with invadopodia	% of invadopodia forming cells
	Exp #1	Field #1	55	6	10.9091	37	9	24.3243				45	10	22.2222	32	11	34.375
		Field #2	62	6	9.67742	44	15	34.0909				49	22	44.898	49	23	46.9388
		Field #3	77	7	9.09091	19	5	26.3158				55	23	41.8182	51	19	37.2549
		Field #4	58	7	12.069	25	8	32				41	15	36.5854	48	21	43.75
		Field #5	77	8	10.3896	16	5	31.25				59	21	35.5932	72	32	44.4444
		Field #6	88	11	12.5	19	4	21.0526				57	28	49.1228	85	38	44.7059
		Field #7	73	9	12.3288	21	5	23.8095				74	33	44.5946	27	11	40.7407
		Field #8	89	11	12.3596	20	2	10				75	35	46.6667	24	12	50
		Field #9	41	5	12.1951	28	4	14.2857				44	21	47.7273	29	16	55.1724
		Field #10	71	10	14.0845	27	8	29.6296				43	21	48.8372	29	16	55.1724
	Exp #2	Field #1	74	5	6.75676	27	3	11.1111
		Field #2	65	5	7.69231	27	4	14.8148
		Field #3	75	10	13.3333	21	6	28.5714
		Field #4	77	11	14.2857	18	2	11.1111
		Field #5	86	9	10.4651	56	6	10.7143
		Field #6	107	14	13.0841	44	7	15.9091
		Field #7	82	10	12.1951	26	3	11.5385
		Field #8	53	9	16.9811	26	6	23.0769
		Field #9	65	5	7.69231	21	4	19.0476
		Field #10	72	13	18.0556	24	5	20.8333
	Exp #3	Field #1	95	6	6.31579	85	9	10.5882				37	15	40.5405	35	15	42.8571
		Field #2	75	9	12	33	5	15.1515				51	13	25.4902	21	8	38.0952
		Field #3	67	9	13.4328	98	12	12.2449				46	16	34.7826	25	14	56
		Field #4	87	5	5.74713	50	8	16				46	26	56.5217	21	14	66.6667
		Field #5	73	6	8.21918	44	5	11.3636				43	15	34.8837	31	15	48.3871
		Field #6	79	7	8.86076	18	3	16.6667				50	22	44	25	11	44
		Field #7	88	8	9.09091	17	4	23.5294				48	19	39.5833	34	8	23.5294
		Field #8	55	7	12.7273	32	5	15.625				44	17	38.6364	37	11	29.7297
		Field #9	86	5	5.81395	43	8	18.6047				38	22	57.8947	64	24	37.5
		Field #10	49	4	8.16327							42	17	40.4762	44	17	38.6364
	Exp #4	Field #1	54	5	9.25926	42	3	7.14286				23	10	43.4783	41	9	21.9512
		Field #2	38	4	10.5263	34	10	29.4118				29	6	20.6897	37	7	18.9189
		Field #3	34	6	17.6471	44	9	20.4545				20	4	20	52	16	30.7692
		Field #4	79	5	6.32911	61	18	29.5082				44	12	27.2727	68	19	27.9412
		Field #5	38	5	13.1579	35	12	34.2857				44	13	29.5455	70	13	18.5714
		Field #6	37	3	8.10811	79	14	17.7215				35	9	25.7143	51	16	31.3725
		Field #7	48	8	16.6667	45	7	15.5556				35	9	25.7143	61	20	32.7869
		Field #8	39	6	15.3846	44	6	13.6364				50	14	28	59	13	22.0339
		Field #9	49	3	6.12245	62	15	24.1935				26	7	26.9231	43	12	27.907
		Field #10	43	4	9.30233	30	7	23.3333				19	4	21.0526	61	13	21.3115
	Exp #5	Field #1										46	17	36.9565				28	10	35.7143
		Field #2										70	34	48.5714				40	17	42.5
		Field #3										54	15	27.7778				24	12	50
		Field #4										34	15	44.1176				27	12	44.4444
		Field #5										30	8	26.6667				25	8	32
		Field #6										50	19	38				25	8	32
		Field #7										59	24	40.678				43	14	32.5581
		Field #8										51	25	49.0196				23	10	43.4783
		Field #9										59	21	35.5932				27	10	37.037
		Field #10										39	15	38.4615				31	14	45.1613
	Exp #6	Field #1	32	3	9.375				23	4	17.3913	16	4	25				30	7	23.3333
		Field #2	23	3	13.0435				15	4	26.6667	19	6	31.5789				12	3	25
		Field #3	34	2	5.88235				39	5	12.8205	24	11	45.8333				22	8	36.3636
		Field #4	27	5	18.5185				37	6	16.2162	25	14	56				49	18	36.7347
		Field #5	47	3	6.38298				68	8	11.7647	29	11	37.931				24	6	25
		Field #6	34	3	8.82353				35	7	20	19	6	31.5789				31	11	35.4839
		Field #7	36	4	11.1111				24	5	20.8333	22	10	45.4545				45	18	40
		Field #8	56	3	5.35714				27	5	18.5185	24	9	37.5				35	9	25.7143
		Field #9	77	5	6.49351				23	7	30.4348	25	8	32				30	7	23.3333
		Field #10	78	8	10.2564				15	5	33.3333	25	10	40				17	6	35.2941
	Exp #7	Field #1	40	3	7.5				27	5	18.5185
		Field #2	28	2	7.14286				35	8	22.8571
		Field #3	24	4	16.6667				20	3	15
		Field #4	24	3	12.5				32	8	25
		Field #5	43	4	9.30233				33	7	21.2121
		Field #6	34	5	14.7059				42	12	28.5714
		Field #7	36	5	13.8889				39	11	28.2051
		Field #8	35	6	17.1429				42	11	26.1905
		Field #9	35	4	11.4286				26	5	19.2308
		Field #10	52	8	15.3846				20	9	45
	Exp #8	Field #1	34	4	11.7647				18	4	22.2222	28	11	39.2857				17	3	17.6471
		Field #2	45	4	8.88889				13	3	23.0769	25	9	36				18	4	22.2222
		Field #3	85	9	10.5882				13	4	30.7692	41	12	29.2683				24	5	20.8333
		Field #4	116	15	12.931				19	4	21.0526	18	8	44.4444				20	6	30
		Field #5	91	14	15.3846				17	5	29.4118	44	11	25				17	6	35.2941
		Field #6	77	5	6.49351				27	8	29.6296	31	7	22.5806				18	6	33.3333
		Field #7	61	10	16.3934				41	11	26.8293	36	13	36.1111				18	5	27.7778
		Field #8	58	8	13.7931				20	5	25	53	19	35.8491				17	6	35.2941
		Field #9	89	15	16.8539				46	13	28.2609	30	8	26.6667				24	6	25
		Field #10	91	12	13.1868				53	22	41.5094	35	15	42.8571				24	6	25
ANOVA summary
F	90.75
P value	< 0,0001
P value summary	****
Are differences among means statistically significant? (P < 0.05)	Yes
R square	0.642
Brown-Forsythe test
F (DFn, DFd)	12,33 (5, 253)
P value	< 0,0001
P value summary	****
Significantly different standard deviations? (P < 0.05)	Yes
Bartlett's test
Bartlett's statistic (corrected)	74.35
P value	< 0,0001
P value summary	****
Significantly different standard deviations? (P < 0.05)	Yes
ANOVA table	SS	DF	MS	F (DFn, DFd)	P value
Treatment (between columns)	29131	5	5826	F (5, 253) = 90,75	P < 0,0001
Residual (within columns)	16242	253	64.2
Total	45373	258
Number of families	1
Number of comparisons per family	15
Alpha	0.05
Bonferroni's multiple comparisons test	Mean Diff,	95% CI of diff,	Significant?	Summary	Adjusted P Value
p27+/+ si ctl vs. p27+/+ si Rac1 #1	-8.467	-13,21 to -3,722	Yes	****	< 0,0001
p27+/+ si ctl vs. p27+/+ si Rac1 #2	-13.28	-18,46 to -8,100	Yes	****	< 0,0001
p27+/+ si ctl vs. p27-/- si ctl	-25.53	-29,71 to -21,36	Yes	****	< 0,0001
p27+/+ si ctl vs. p27-/- si Rac1 #1	-26.48	-31,67 to -21,30	Yes	****	< 0,0001
p27+/+ si ctl vs. p27-/- si Rac1 #2	-21.21	-26,39 to -16,03	Yes	****	< 0,0001
p27+/+ si Rac1 #1 vs. p27+/+ si Rac1 #2	-4.814	-10,58 to 0,9519	No	ns	0.2102
p27+/+ si Rac1 #1 vs. p27-/- si ctl	-17.07	-21,95 to -12,18	Yes	****	< 0,0001
p27+/+ si Rac1 #1 vs. p27-/- si Rac1 #1	-18.02	-23,78 to -12,25	Yes	****	< 0,0001
p27+/+ si Rac1 #1 vs. p27-/- si Rac1 #2	-12.74	-18,51 to -6,978	Yes	****	< 0,0001
p27+/+ si Rac1 #2 vs. p27-/- si ctl	-12.25	-17,56 to -6,944	Yes	****	< 0,0001
p27+/+ si Rac1 #2 vs. p27-/- si Rac1 #1	-13.2	-19,33 to -7,073	Yes	****	< 0,0001
p27+/+ si Rac1 #2 vs. p27-/- si Rac1 #2	-7.93	-14,06 to -1,799	Yes	**	0.0024
p27-/- si ctl vs. p27-/- si Rac1 #1	-0.95	-6,259 to 4,359	No	ns	> 0,9999
p27-/- si ctl vs. p27-/- si Rac1 #2	4.323	-0,9859 to 9,633	No	ns	0.248
p27-/- si Rac1 #1 vs. p27-/- si Rac1 #2	5.273	-0,8572 to 11,40	No	ns	0.1709
Test details	Mean 1	Mean 2	Mean Diff,	SE of diff,	n1	n2	t	DF
p27+/+ si ctl vs. p27+/+ si Rac1 #1	11.24	19.7	-8.467	1.601	70	39	5.288	253
p27+/+ si ctl vs. p27+/+ si Rac1 #2	11.24	24.52	-13.28	1.748	70	30	7.596	253
p27+/+ si ctl vs. p27-/- si ctl	11.24	36.77	-25.53	1.41	70	60	18.11	253
p27+/+ si ctl vs. p27-/- si Rac1 #1	11.24	37.72	-26.48	1.748	70	30	15.15	253
p27+/+ si ctl vs. p27-/- si Rac1 #2	11.24	32.45	-21.21	1.748	70	30	12.13	253
p27+/+ si Rac1 #1 vs. p27+/+ si Rac1 #2	19.7	24.52	-4.814	1.946	39	30	2.474	253
p27+/+ si Rac1 #1 vs. p27-/- si ctl	19.7	36.77	-17.07	1.648	39	60	10.36	253
p27+/+ si Rac1 #1 vs. p27-/- si Rac1 #1	19.7	37.72	-18.02	1.946	39	30	9.26	253
p27+/+ si Rac1 #1 vs. p27-/- si Rac1 #2	19.7	32.45	-12.74	1.946	39	30	6.55	253
p27+/+ si Rac1 #2 vs. p27-/- si ctl	24.52	36.77	-12.25	1.792	30	60	6.839	253
p27+/+ si Rac1 #2 vs. p27-/- si Rac1 #1	24.52	37.72	-13.2	2.069	30	30	6.382	253
p27+/+ si Rac1 #2 vs. p27-/- si Rac1 #2	24.52	32.45	-7.93	2.069	30	30	3.833	253
p27-/- si ctl vs. p27-/- si Rac1 #1	36.77	37.72	-0.95	1.792	60	30	0.5302	253
p27-/- si ctl vs. p27-/- si Rac1 #2	36.77	32.45	4.323	1.792	60	30	2.413	253
p27-/- si Rac1 #1 vs. p27-/- si Rac1 #2	37.72	32.45	5.273	2.069	30	30	2.549	253

## Sheet: Fig 7C
Figure 7C: Quantification of degraded gelatin area after silencing of Rac1
			p27+/+												p27 -/-
			si control				si Rac1 #1				si Rac1 #2				si control				si Rac1 #1				si Rac1 #2
			# cells	Sum degraded area (μm²)	Degraded per cells (μm²)	Fold change relative to p27+/+ si control	# cells	Sum degraded area (μm²)	Degraded per cells (μm²)	Fold change relative to p27+/+ si control	# cells	Sum degraded area (μm²)	Degraded per cells (μm²)	Fold change relative to p27+/+ si control	# cells	Sum degraded area (μm²)	Degraded per cells (μm²)	Fold change relative to p27-/- si control	# cells	Sum degraded area (μm²)	Degraded per cells (μm²)	Fold change relative to p27-/- si control	# cells	Sum degraded area (μm²)	Degraded per cells (μm²)	Fold change relative to p27-/- si control
	Exp #1	Field #1	55	0	0	0	37	3292.61	88.9895	37.3004					45	15424.8	342.774	0.9261	32	10611	331.594	0.895893
		Field #2	62	0	0	0	44	7377.15	167.662	70.2766					49	35881.1	732.268	1.97843	49	20475.4	417.865	1.12898
		Field #3	77	831.93	10.8043	4.52867	19	1016.48	53.4989	22.4243					55	15668.2	284.877	0.769674	51	15043.7	294.974	0.796955
		Field #4	58	0	0	0	25	4884.77	195.391	81.899					41	10767.4	262.619	0.709539	48	14130.2	294.379	0.795346
		Field #5	77	141.89	1.84273	0.772388	16	408.84	25.5525	10.7105					59	13324	225.831	0.610144	72	15122.6	210.037	0.567473
		Field #6	88	0	0	0	19	965.36	50.8084	21.2966					57	24366.8	427.488	1.15498	85	24192.8	284.621	0.768982
		Field #7	73	146.3	2.00411	0.840032	21	10640.3	506.68	212.378					74	24890	336.352	0.908749	27	11116.2	411.712	1.11236
		Field #8	89	238.03	2.67449	1.12103	20	2055.85	102.792	43.086					75	16779.9	223.732	0.604475	24	13267.3	552.806	1.49356
		Field #9	41	103.15	2.51585	1.05453	28	232.47	8.3025	3.48003					44	15731.6	357.537	0.965987	29	32446.5	1118.85	3.02287
		Field #10	71	285.14	4.01606	1.68335	27	4415.6	163.541	68.5489					43	21834.8	507.787	1.37193	29	23506.5	810.57	2.18998
		Mean			2.38575												370.126
	Exp #2	Field #1	74	152.79	2.06473	1.80252	27	198.83	7.36407	6.42888
		Field #2	65	0	0	0	27	132.26	4.89852	4.27643
		Field #3	75	0	0	0	21	710.71	33.8433	29.5454
		Field #4	77	0	0	0	18	9231.2	512.844	447.716
		Field #5	86	0	0	0	56	0	0	0
		Field #6	107	0	0	0	44	518.72	11.7891	10.2919
		Field #7	82	0	0	0	26	0	0	0
		Field #8	53	252.84	4.77057	4.16473	26	111.04	4.27077	3.72841
		Field #9	65	300.26	4.61938	4.03275	21	164.93	7.85381	6.85642
		Field #10	72	0	0	0	24	359.02	14.9592	13.0594
		Mean			1.14547
	Exp #3	Field #1	95	0	0	0	85	0	0	0					37	3300.06	89.1908	0.843981	35	5572.79	159.223	1.50667
		Field #2	75	251.49	3.3532	3.43178	33	1393.05	42.2136	43.2029					51	2062.98	40.4506	0.382769	21	4481.48	213.404	2.01936
		Field #3	67	0	0	0	98	901.79	9.20194	9.41757					46	5081.67	110.471	1.04535	25	4127.96	165.118	1.56246
		Field #4	87	0	0	0	50	619.33	12.3866	12.6769					46	1849.71	40.2111	0.380503	21	3291.59	156.742	1.4832
		Field #5	73	0	0	0	44	384.63	8.74159	8.94644					43	5430.13	126.282	1.19496	31	11718	378	3.57688
		Field #6	79	352.62	4.46354	4.56814	18	257.36	14.2978	14.6328					50	5659.9	113.198	1.07115	25	10257.8	410.31	3.88262
		Field #7	88	0	0	0	17	0	0	0					48	13709.5	285.615	2.70267	34	19339.2	568.799	5.38234
		Field #8	55	0	0	0	32	0	0	0					44	5488.67	124.742	1.18039	37	4491.73	121.398	1.14875
		Field #9	86	0	0	0	43	96.56	2.24558	2.2982					38	2479.35	65.2461	0.6174	64	1572.96	24.5775	0.232568
		Field #10	49	95.76	1.95429	2.00008									42	2577.95	61.3798	0.580815	44	6062.96	137.795	1.3039
		Mean			0.977103												105.679
	Exp #4	Field #1	54	47.54	0.88037	0.610212	42	770.85	18.3536	12.7214					23	14177.2	616.4	2.97313	41	5997.75	146.287	0.705595
		Field #2	38	122.24	3.21684	2.22969	34	0	0	0					29	13311.4	459.015	2.214	37	3290.06	88.9205	0.428897
		Field #3	34	126.55	3.72206	2.57987	44	1113.15	25.2989	17.5354					20	1599.73	79.9865	0.385805	52	1473	28.3269	0.136631
		Field #4	79	0	0	0	61	502.74	8.24164	5.71253					44	4446.71	101.062	0.487458	68	6288.17	92.4731	0.446032
		Field #5	38	0	0	0	35	884.77	25.2791	17.5217					44	6440.52	146.375	0.706023	70	10422.1	148.888	0.71814
		Field #6	37	93.58	2.52919	1.75306	79	1566.96	19.8349	13.7482					35	3333.76	95.2503	0.459428	51	9291.75	182.191	0.878776
		Field #7	48	0	0	0	45	193.47	4.29933	2.98					35	4145.07	118.431	0.571235	61	6234.37	102.203	0.492962
		Field #8	39	129.87	3.33	2.30812	44	449.64	10.2191	7.08316					50	5752.18	115.044	0.554898	59	9123.64	154.638	0.745877
		Field #9	49	0	0	0	62	222.79	3.59339	2.49069					26	3875.98	149.076	0.71905	43	3399.8	79.0651	0.381361
		Field #10	43	32.2	0.748837	0.519042	30	281.42	9.38067	6.50203					19	3659.37	192.598	0.928974	61	11984.3	196.463	0.947616
		Mean			1.44273												207.324
	Exp #5	Field #1													46	9241.14	200.894	1.11495					28	16627.2	593.828	3.29569
		Field #2													70	10619.4	151.706	0.841955					40	5520.05	138.001	0.765895
		Field #3													54	5784.74	107.125	0.594533					24	9866.19	411.091	2.28152
		Field #4													34	8605.76	253.111	1.40474					27	11165.1	413.522	2.29501
		Field #5													30	8141.87	271.396	1.50622					25	2781.66	111.266	0.617519
		Field #6													50	10505.8	210.115	1.16612					25	1607.58	64.3032	0.356877
		Field #7													59	9306.61	157.739	0.875438					43	14151.4	329.103	1.82649
		Field #8													51	4490.71	88.0531	0.488687					23	3836.49	166.804	0.925747
		Field #9													59	5054.42	85.6681	0.47545					27	3197.63	118.431	0.65728
		Field #10													39	10764.9	276.024	1.53191					31	4570.74	147.443	0.818297
		Mean															180.183
	Exp #6	Field #1	32	57.12	1.785	0.790813					23	1100.77	47.8596	21.2033	16	32339.3	2021.21	2.36012					30	5822.46	194.082	0.226625
		Field #2	23	0	0	0					15	1874.11	124.941	55.3527	19	21330.6	1122.66	1.31091					12	4913.25	409.438	0.478091
		Field #3	34	262.55	7.72206	3.42112					39	2341.24	60.0318	26.596	24	9102.52	379.272	0.442867					22	12173.2	553.326	0.646106
		Field #4	27	0	0	0					37	667.17	18.0316	7.98859	25	10686.8	427.474	0.499151					49	22967.1	468.716	0.547309
		Field #5	47	266.46	5.66936	2.51171					68	1598.96	23.5141	10.4175	29	10937.7	377.161	0.440402					24	4206.91	175.288	0.20468
		Field #6	34	0	0	0					35	1202.72	34.3634	15.2241	19	10259.3	539.964	0.630504					31	2096.01	67.6132	0.0789504
		Field #7	36	80.13	2.22583	0.986116					24	564.37	23.5154	10.4181	22	5551.4	252.336	0.294648					45	13153.4	292.297	0.341309
		Field #8	56	179.73	3.20946	1.4219					27	299.22	11.0822	4.90978	24	29326.4	1221.93	1.42682					35	7315.3	209.009	0.244055
		Field #9	77	0	0	0					23	75.05	3.26304	1.44563	25	35192	1407.68	1.64372					30	7782.87	259.429	0.302929
		Field #10	78	152.88	1.96	0.868343					15	661.19	44.0793	19.5286	25	20358	814.321	0.950864					17	1847.23	108.661	0.126881
		Mean			2.25717												856.401
	Exp #7	Field #1	40	659.02	16.4755	4.27014					27	863.49	31.9811	8.28891
		Field #2	28	70.27	2.50964	0.650453					35	509.73	14.5637	3.77464
		Field #3	24	0	0	0					20	2731.11	136.555	35.3926
		Field #4	24	98.86	4.11917	1.06761					32	913.89	28.5591	7.40198
		Field #5	43	386.67	8.99233	2.33064					33	4632.97	140.393	36.3873
		Field #6	34	0	0	0					42	1491.01	35.5002	9.201
		Field #7	36	128.48	3.56889	0.924989					39	1549.42	39.7287	10.2969
		Field #8	35	0	0	0					42	3641.41	86.7002	22.4711
		Field #9	35	0	0	0					26	1040.53	40.0204	10.3725
		Field #10	52	151.71	2.9175	0.756162					20	1431.53	71.5765	18.5513
		Mean			3.8583
	Exp #8	Field #1	34	30.71	0.903235	0.401427					18	432.61	24.0339	10.6814	28	16569	591.749	1.18014					17	5851.22	344.189	0.686427
		Field #2	45	222.16	4.93689	2.19411					13	304.53	23.4254	10.411	25	16006.3	640.253	1.27688					18	3863.65	214.647	0.428077
		Field #3	85	375.13	4.41329	1.96141					13	98	7.53846	3.35034	41	19183.9	467.9	0.933147					24	4858.81	202.45	0.403753
		Field #4	116	461.75	3.9806	1.76911					19	277.02	14.58	6.47983	18	12151.3	675.07	1.34631					20	1543.79	77.1895	0.153941
		Field #5	91	223.29	2.45374	1.09052					17	345.1	20.3	9.02198	44	23110.5	525.238	1.0475					17	1664.45	97.9088	0.195262
		Field #6	77	0	0	0					27	313.22	11.6007	5.15575	31	17256.3	556.655	1.11015					18	7567.06	420.392	0.8384
		Field #7	61	313.24	5.13508	2.2822					41	630.71	15.3832	6.83678	36	10505.1	291.808	0.581961					18	877.53	48.7517	0.0972268
		Field #8	58	39.31	0.677759	0.301218					20	293.85	14.6925	6.52983	53	12026	226.906	0.452525					17	411.45	24.2029	0.0482686
		Field #9	89	0	0	0					46	738.97	16.0646	7.13962	30	11490.8	383.025	0.763878					24	4928.9	205.371	0.409577
		Field #10	91	0	0	0					53	843.28	15.9109	7.07134	35	22946.5	655.614	1.30751					24	122.29	5.09542	0.0101619
		Mean			2.25006												501.422
ANOVA summary
F	13.92
P value	< 0,0001
P value summary	****
Are differences among means statistically significant? (P < 0.05)	Yes
R square	0.2164
Brown-Forsythe test
F (DFn, DFd)	10,16 (5, 252)
P value	< 0,0001
P value summary	****
Significantly different standard deviations? (P < 0.05)	Yes
Bartlett's test
Bartlett's statistic (corrected)	978.8
P value	< 0,0001
P value summary	****
Significantly different standard deviations? (P < 0.05)	Yes
ANOVA table	SS	DF	MS	F (DFn, DFd)	P value
Treatment (between columns)	15735	5	3147	F (5, 252) = 13,92	P < 0,0001
Residual (within columns)	56972	252	226.1
Total	72707	257
Number of families	1
Number of comparisons per family	15
Alpha	0.05
Bonferroni's multiple comparisons test	Mean Diff,	95% CI of diff,	Significant?	Summary	Adjusted P Value
p27+/+ si ctl vs. p27+/+ si Rac1 #1	-20.66	-29,64 to -11,68	Yes	****	< 0,0001
p27+/+ si ctl vs. p27+/+ si Rac1 #2	-12.6	-22,32 to -2,874	Yes	**	0.0023
p27+/+ si ctl vs. p27-/- si ctl	-9.523e-05	-7,839 to 7,839	No	ns	> 0,9999
p27+/+ si ctl vs. p27-/- si Rac1 #1	-0.3594	-10,08 to 9,364	No	ns	> 0,9999
p27+/+ si ctl vs. p27-/- si Rac1 #2	0.3212	-9,402 to 10,04	No	ns	> 0,9999
p27+/+ si Rac1 #1 vs. p27+/+ si Rac1 #2	8.063	-2,819 to 18,95	No	ns	0.4353
p27+/+ si Rac1 #1 vs. p27-/- si ctl	20.66	11,42 to 29,90	Yes	****	< 0,0001
p27+/+ si Rac1 #1 vs. p27-/- si Rac1 #1	20.3	9,418 to 31,18	Yes	****	< 0,0001
p27+/+ si Rac1 #1 vs. p27-/- si Rac1 #2	20.98	10,10 to 31,86	Yes	****	< 0,0001
p27+/+ si Rac1 #2 vs. p27-/- si ctl	12.6	2,633 to 22,56	Yes	**	0.0033
p27+/+ si Rac1 #2 vs. p27-/- si Rac1 #1	12.24	0,7327 to 23,74	Yes	*	0.0272
p27+/+ si Rac1 #2 vs. p27-/- si Rac1 #2	12.92	1,413 to 24,42	Yes	*	0.0151
p27-/- si ctl vs. p27-/- si Rac1 #1	-0.3593	-10,32 to 9,604	No	ns	> 0,9999
p27-/- si ctl vs. p27-/- si Rac1 #2	0.3213	-9,642 to 10,28	No	ns	> 0,9999
p27-/- si Rac1 #1 vs. p27-/- si Rac1 #2	0.6807	-10,82 to 12,19	No	ns	> 0,9999
Test details	Mean 1	Mean 2	Mean Diff,	SE of diff,	n1	n2	t	DF
p27+/+ si ctl vs. p27+/+ si Rac1 #1	0.9996	21.66	-20.66	3.03	70	38	6.819	252
p27+/+ si ctl vs. p27+/+ si Rac1 #2	0.9996	13.6	-12.6	3.281	70	30	3.839	252
p27+/+ si ctl vs. p27-/- si ctl	0.9996	0.9997	-9.523e-05	2.645	70	60	3.6e-05	252
p27+/+ si ctl vs. p27-/- si Rac1 #1	0.9996	1.359	-0.3594	3.281	70	30	0.1095	252
p27+/+ si ctl vs. p27-/- si Rac1 #2	0.9996	0.6783	0.3212	3.281	70	30	0.09791	252
p27+/+ si Rac1 #1 vs. p27+/+ si Rac1 #2	21.66	13.6	8.063	3.672	38	30	2.196	252
p27+/+ si Rac1 #1 vs. p27-/- si ctl	21.66	0.9997	20.66	3.117	38	60	6.628	252
p27+/+ si Rac1 #1 vs. p27-/- si Rac1 #1	21.66	1.359	20.3	3.672	38	30	5.528	252
p27+/+ si Rac1 #1 vs. p27-/- si Rac1 #2	21.66	0.6783	20.98	3.672	38	30	5.714	252
p27+/+ si Rac1 #2 vs. p27-/- si ctl	13.6	0.9997	12.6	3.362	30	60	3.747	252
p27+/+ si Rac1 #2 vs. p27-/- si Rac1 #1	13.6	1.359	12.24	3.882	30	30	3.152	252
p27+/+ si Rac1 #2 vs. p27-/- si Rac1 #2	13.6	0.6783	12.92	3.882	30	30	3.328	252
p27-/- si ctl vs. p27-/- si Rac1 #1	0.9997	1.359	-0.3593	3.362	60	30	0.1069	252
p27-/- si ctl vs. p27-/- si Rac1 #2	0.9997	0.6783	0.3213	3.362	60	30	0.09557	252
p27-/- si Rac1 #1 vs. p27-/- si Rac1 #2	1.359	0.6783	0.6807	3.882	30	30	0.1753	252

## Sheet: Fig 7E
Figure 7E: Quantification of cells with invadopodia after NSC23766 treatment
			p27+/+						p27 -/-
			-			NSC23766			-			NSC23766
			# cells	# Cells with invadopodia	% of invadopodia forming cells	# cells	# Cells with invadopodia	% of invadopodia forming cells	# cells	# Cells with invadopodia	% of invadopodia forming cells	# cells	# Cells with invadopodia	% of invadopodia forming cells
	Exp #1	Field #1	40	9	22.5	47	12	25.5319	34	15	44.1176	25	11	44
		Field #2	31	5	16.129	45	10	22.2222	32	18	56.25	28	10	35.7143
		Field #3	33	6	18.1818	65	22	33.8462	25	10	40	22	9	40.9091
		Field #4	28	6	21.4286	57	21	36.8421	34	22	64.7059	31	7	22.5806
		Field #5	37	3	8.10811	52	14	26.9231	46	25	54.3478	26	8	30.7692
		Field #6	52	5	9.61538	74	15	20.2703	44	18	40.9091	29	14	48.2759
		Field #7	53	4	7.54717	53	15	28.3019	55	25	45.4545	23	10	43.4783
		Field #8	44	11	25	43	15	34.8837	53	22	41.5094	23	7	30.4348
		Field #9	43	11	25.5814	43	15	34.8837	49	23	46.9388	28	7	25
		Field #10	22	5	22.7273	46	14	30.4348	40	18	45	22	10	45.4545
	Exp #2	Field #1	56	20	35.7143	31	16	51.6129	75	34	45.3333	52	24	46.1538
		Field #2	69	12	17.3913	39	7	17.9487	75	37	49.3333	48	18	37.5
		Field #3	99	22	22.2222	35	9	25.7143	80	9	11.25	46	29	63.0435
		Field #4	74	13	17.5676	29	2	6.89655	83	33	39.759	30	13	43.3333
		Field #5	69	20	28.9855	40	14	35	64	37	57.8125	58	21	36.2069
		Field #6	85	25	29.4118	34	11	32.3529	75	33	44	55	28	50.9091
		Field #7	79	13	16.4557	39	18	46.1538	65	33	50.7692	50	29	58
		Field #8	68	11	16.1765	40	18	45	96	48	50	53	32	60.3774
		Field #9	70	22	31.4286	50	17	34	90	31	34.4444	59	36	61.0169
		Field #10	71	18	25.3521	43	11	25.5814	106	46	43.3962	45	30	66.6667
	Exp #3	Field #1	57	8	14.0351	5	2	40	27	12	44.4	18	7	38.9
		Field #2	80	6	7.5	18	6	33.3333	30	9	30	22	5	22.7
		Field #3	61	4	6.55738	18	5	27.7778	28	13	46.4	21	7	33.3
		Field #4	25	5	20	13	6	46.1538	32	20	62.5	27	8	29.6
		Field #5	35	8	22.8571	17	7	41.1765	31	11	35.5	15	5	33.3
		Field #6	49	6	12.2449	16	4	25	35	17	48.6	37	8	21.6
		Field #7	33	4	12.1212	16	8	50	27	17	63	12	6	50
		Field #8	16	3	18.75	12	4	33.3333	20	9	45	16	4	25
		Field #9	23	3	13.0435	22	9	40.9091	25	13	52	15	4	26.7
		Field #10	27	4	14.8148	16	5	31.25	31	9	29	26	7	26.9
ANOVA summary
F	36.15
P value	< 0,0001
P value summary	****
Are differences among means statistically significant? (P < 0.05)	Yes
R square	0.4831
Brown-Forsythe test
F (DFn, DFd)	2,763 (3, 116)
P value	0.0452
P value summary	*
Significantly different standard deviations? (P < 0.05)	Yes
Bartlett's test
Bartlett's statistic (corrected)	8.665
P value	0.0341
P value summary	*
Significantly different standard deviations? (P < 0.05)	Yes
ANOVA table	SS	DF	MS	F (DFn, DFd)	P value
Treatment (between columns)	12059	3	4020	F (3, 116) = 36,15	P < 0,0001
Residual (within columns)	12901	116	111.2
Total	24960	119
Bonferroni's multiple comparisons test	Mean Diff,	95% CI of diff,	Significant?	Summary	Adjusted P Value
p27+/+ vs. p27+/+ NSC23766	-14.13	-21,44 to -6,821	Yes	****	< 0,0001
p27+/+ vs. p27-/-	-26.74	-34,05 to -19,43	Yes	****	< 0,0001
p27+/+ vs. p27-/- NSC23766	-21.28	-28,59 to -13,97	Yes	****	< 0,0001
p27+/+ NSC23766 vs. p27-/-	-12.61	-19,92 to -5,304	Yes	****	< 0,0001
p27+/+ NSC23766 vs. p27-/- NSC23766	-7.153	-14,46 to 0,1556	No	ns	0.0586
p27-/- vs. p27-/- NSC23766	5.46	-1,849 to 12,77	No	ns	0.2836
Test details	Mean 1	Mean 2	Mean Diff,	SE of diff,	n1	n2	t	DF
p27+/+ vs. p27+/+ NSC23766	18.65	32.78	-14.13	2.723	30	30	5.189	116
p27+/+ vs. p27-/-	18.65	45.39	-26.74	2.723	30	30	9.822	116
p27+/+ vs. p27-/- NSC23766	18.65	39.93	-21.28	2.723	30	30	7.816	116
p27+/+ NSC23766 vs. p27-/-	32.78	45.39	-12.61	2.723	30	30	4.632	116
p27+/+ NSC23766 vs. p27-/- NSC23766	32.78	39.93	-7.153	2.723	30	30	2.627	116
p27-/- vs. p27-/- NSC23766	45.39	39.93	5.46	2.723	30	30	2.005	116

## Sheet: Fig 7F
Figure 7F: Quantification of degraded gelatin area per cell after treatment with NSC23766
			p27+/+								p27 -/-
			-				NSC23766				-				NSC23766
			# cells	Sum degraded area (μm²)	Degraded per cells (μm²)	Fold change relative to p27+/+ -	# cells	Sum degraded area (μm²)	Degraded per cells (μm²)	Fold change relative to p27+/+ -	# cells	Sum degraded area (μm²)	Degraded per cells (μm²)	Fold change relative to p27-/- -	# cells	Sum degraded area (μm²)	Degraded per cells (μm²)	Fold change relative to p27-/- -
	Exp #1	Field #1	40	0	0	0	47	2018.88	42.9549	12.5408	34	6921.57	203.576	0.452506	25	12933.6	517.343	1.14995
		Field #2	31	0	0	0	45	1176.76	26.1502	7.63462	32	12394	387.312	0.860914	28	8576.76	306.313	0.68087
		Field #3	33	0	0	0	65	2729.73	41.9958	12.2608	25	22173.6	886.944	1.97149	22	13227.8	601.265	1.33649
		Field #4	28	0	0	0	57	0	0	0	34	15473.3	455.097	1.01159	31	4855.55	156.631	0.348157
		Field #5	37	409.23	11.0603	3.22907	52	0	0	0	46	26168.6	568.883	1.26451	26	16583.4	637.822	1.41774
		Field #6	52	0	0	0	74	756.78	10.2268	2.98573	44	14719.9	334.542	0.743618	29	8805.22	303.628	0.674902
		Field #7	53	0	0	0	53	581.29	10.9677	3.20206	55	24521.6	445.847	0.991026	23	11939.2	519.094	1.15384
		Field #8	44	333.49	7.57932	2.2128	43	0	0	0	53	14793.6	279.124	0.620435	23	7446.47	323.76	0.71965
		Field #9	43	671.34	15.6126	4.55813	43	570.01	13.256	3.87014	49	22464.2	458.453	1.01905	28	10173.9	363.354	0.80766
		Field #10	22	0	0	0	46	0	0	0	40	19162.8	479.069	1.06487	22	7314.41	332.473	0.739019
		Mean			3.42521								449.885
	Exp #2	Field #1	56	382.6	6.83214	3.83444	31	0	0	0	75	5486.69	73.1559	0.70939	52	38387.5	738.222	7.15851
		Field #2	69	0	0	0	39	355.16	9.10667	5.11098	75	4882.88	65.1051	0.631322	48	13964.6	290.929	2.82113
		Field #3	99	604.1	6.10202	3.42467	35	2770.94	79.1697	44.4328	80	9031.43	112.893	1.09472	46	4009.58	87.1648	0.845234
		Field #4	74	0	0	0	29	960.99	33.1376	18.598	83	11383.5	137.151	1.32995	30	1347.73	44.9243	0.43563
		Field #5	69	0	0	0	40	0	0	0	64	2463.31	38.4892	0.373229	58	818.38	14.11	0.136824
		Field #6	85	0	0	0	34	1078.92	31.7329	17.8096	75	6809.32	90.7909	0.880397	55	5588.63	101.611	0.985323
		Field #7	79	0	0	0	39	204.63	5.24692	2.94476	65	4616.57	71.0242	0.688719	50	5287.93	105.759	1.02554
		Field #8	68	332.09	4.88368	2.74089	40	0	0	0	96	13114.4	136.608	1.32469	53	6714.95	126.697	1.22858
		Field #9	70	0	0	0	50	515.01	10.3002	5.78084	90	17254.4	191.716	1.85906	59	3270.32	55.4292	0.537495
		Field #10	71	0	0	0	43	2836.99	65.9765	37.0283	106	12117.6	114.317	1.10853	45	3331.77	74.0393	0.717957
		Mean			1.78178								103.125
	Exp #3	Field #1	57	205.56	3.60632	1.05386	5	7094.14	1418.83	414.62	27	34906.9	1292.85	1.0216	18	25965.2	1442.51	1.13986
		Field #2	80	0	0	0	18	2135.9	118.661	34.676	30	43934.8	1464.49	1.15723	22	17262.5	784.66	0.620031
		Field #3	61	186.68	3.06033	0.894311	18	1199.29	66.6272	19.4703	28	45974.7	1641.95	1.29746	21	40921.2	1948.63	1.53979
		Field #4	25	0	0	0	13	474.9	36.5308	10.6753	32	45773.8	1430.43	1.13031	27	53533.5	1982.72	1.56673
		Field #5	35	301.82	8.62343	2.52	17	0	0	0	31	66723.9	2152.38	1.70079	15	29136.3	1942.42	1.53488
		Field #6	49	0	0	0	16	315.96	19.7475	5.77076	35	46629.9	1332.28	1.05276	37	30926.8	835.858	0.660487
		Field #7	33	449.59	13.6239	3.98129	16	426.09	26.6306	7.7822	27	21413.2	793.081	0.626685	12	54674.7	4556.22	3.60028
		Field #8	16	0	0	0	12	384.38	32.0317	9.36053	20	24894.4	1244.72	0.983565	16	62716.1	3919.76	3.09736
		Field #9	23	0	0	0	22	598.01	27.1823	7.9434	25	7529.3	301.172	0.237983	15	2231.73	148.782	0.117566
		Field #10	27	143.26	5.30593	1.55054	16	2022.86	126.429	36.9459	31	31056.1	1001.81	0.791622	26	45008.4	1731.09	1.36789
		Mean			3.42199								1265.52
ANOVA summary
F	16.19
P value	< 0,0001
P value summary	****
Are differences among means statistically significant? (P < 0.05)	Yes
R square	0.2969
Brown-Forsythe test
F (DFn, DFd)	17,70 (3, 115)
P value	< 0,0001
P value summary	****
Significantly different standard deviations? (P < 0.05)	Yes
Bartlett's test
Bartlett's statistic (corrected)	290.4
P value	< 0,0001
P value summary	****
Significantly different standard deviations? (P < 0.05)	Yes
ANOVA table	SS	DF	MS	F (DFn, DFd)	P value
Treatment (between columns)	1968	3	656	F (3, 115) = 16,19	P < 0,0001
Residual (within columns)	4661	115	40.53
Total	6629	118
Bonferroni's multiple comparisons test	Mean Diff,	95% CI of diff,	Significant?	Summary	Adjusted P Value
p27+/+ vs. p27+/+ NSC23766	-9.581	-14,03 to -5,130	Yes	****	< 0,0001
p27+/+ vs. p27-/-	0.0003333	-4,413 to 4,413	No	ns	> 0,9999
p27+/+ vs. p27-/- NSC23766	-0.3407	-4,754 to 4,072	No	ns	> 0,9999
p27+/+ NSC23766 vs. p27-/-	9.581	5,130 to 14,03	Yes	****	< 0,0001
p27+/+ NSC23766 vs. p27-/- NSC23766	9.24	4,789 to 13,69	Yes	****	< 0,0001
p27-/- vs. p27-/- NSC23766	-0.341	-4,754 to 4,072	No	ns	> 0,9999
Test details	Mean 1	Mean 2	Mean Diff,	SE of diff,	n1	n2	t	DF
p27+/+ vs. p27+/+ NSC23766	0.9993	10.58	-9.581	1.658	30	29	5.779	115
p27+/+ vs. p27-/-	0.9993	0.999	0.0003333	1.644	30	30	0.0002028	115
p27+/+ vs. p27-/- NSC23766	0.9993	1.34	-0.3407	1.644	30	30	0.2073	115
p27+/+ NSC23766 vs. p27-/-	10.58	0.999	9.581	1.658	29	30	5.779	115
p27+/+ NSC23766 vs. p27-/- NSC23766	10.58	1.34	9.24	1.658	29	30	5.573	115
p27-/- vs. p27-/- NSC23766	0.999	1.34	-0.341	1.644	30	30	0.2075	115

## Sheet: Fig 7 - Supp1A
Figure 7 -supp 1A: Quantification of cells with invadopodia after silencing of RhoA
			p27+/+									p27 -/-
			si control			si RhoA #1			si RhoA #2			si control			si RhoA #1			si RhoA #2
			# cells	# Cells with invadopodia	% of invadopodia forming cells	# cells	# Cells with invadopodia	% of invadopodia forming cells	# cells	# Cells with invadopodia	% of invadopodia forming cells	# cells	# Cells with invadopodia	% of invadopodia forming cells	# cells	# Cells with invadopodia	% of invadopodia forming cells	# cells	# Cells with invadopodia	% of invadopodia forming cells
	Exp #1	Field #1	55	6	10.9091	35	3	8.57143				45	10	22.2222	27	11	40.7407
		Field #2	62	6	9.67742	43	4	9.30233				49	22	44.898	57	22	38.5965
		Field #3	77	7	9.09091	68	8	11.7647				55	23	41.8182	19	7	36.8421
		Field #4	58	7	12.069	43	4	9.30233				41	15	36.5854	31	9	29.0323
		Field #5	77	8	10.3896	85	7	8.23529				59	21	35.5932	14	2	14.2857
		Field #6	88	11	12.5	31	2	6.45161				57	28	49.1228	22	5	22.7273
		Field #7	73	9	12.3288	32	4	12.5				74	33	44.5946	30	7	23.3333
		Field #8	89	11	12.3596	76	6	7.89474				75	35	46.6667	24	12	50
		Field #9	41	5	12.1951	61	5	8.19672				44	21	47.7273	18	8	44.4444
		Field #10	71	10	14.0845	33	4	12.1212				43	21	48.8372	19	5	26.3158
	Exp #2	Field #1	74	5	6.75676	73	8	10.9589
		Field #2	65	5	7.69231	81	12	14.8148
		Field #3	75	10	13.3333	101	11	10.8911
		Field #4	77	11	14.2857	88	9	10.2273
		Field #5	86	9	10.4651	48	6	12.5
		Field #6	107	14	13.0841	25	5	20
		Field #7	82	10	12.1951	24	3	12.5
		Field #8	53	9	16.9811	33	3	9.09091
		Field #9	65	5	7.69231	37	5	13.5135
		Field #10	72	13	18.0556	40	8	20
	Exp #3	Field #1	95	6	6.31579	79	9	11.3924				37	15	40.5405	53	22	41.5094
		Field #2	75	9	12	126	12	9.52381				51	13	25.4902	52	23	44.2308
		Field #3	67	9	13.4328	112	8	7.14286				46	16	34.7826	37	14	37.8378
		Field #4	87	5	5.74713	63	9	14.2857				46	26	56.5217	39	16	41.0256
		Field #5	73	6	8.21918	41	8	19.5122				43	15	34.8837	40	16	40
		Field #6	79	7	8.86076	46	3	6.52174				50	22	44	19	10	52.6316
		Field #7	88	8	9.09091	53	5	9.43396				48	19	39.5833	20	5	25
		Field #8	55	7	12.7273	115	13	11.3043				44	17	38.6364	45	15	33.3333
		Field #9	86	5	5.81395	69	11	15.942				38	22	57.8947	24	12	50
		Field #10	49	4	8.16327	89	11	12.3596				42	17	40.4762	48	14	29.1667
	Exp #4	Field #1	55	4	7.27273	62	10	16.129				77	50	64.9351	36	18	50
		Field #2	62	8	12.9032	72	7	9.72222				55	21	38.1818	20	13	65
		Field #3	46	5	10.8696	69	7	10.1449				49	19	38.7755	25	14	56
		Field #4	48	7	14.5833	63	11	17.4603				62	33	53.2258	39	18	46.1538
		Field #5	130	13	10	57	7	12.2807				49	22	44.898	25	17	68
		Field #6	61	4	6.55738	42	3	7.14286				69	32	46.3768	21	10	47.619
		Field #7	65	5	7.69231	46	7	15.2174				56	20	35.7143	36	22	61.1111
		Field #8	31	12	38.7097	71	8	11.2676				33	11	33.3333	25	13	52
		Field #9	57	8	14.0351	41	2	4.87805				50	30	60	29	21	72.4138
		Field #10	55	8	14.5455	48	5	10.4167				71	33	46.4789	29	16	55.1724
	Exp #5	Field #1										46	17	36.9565				23	6	26.087
		Field #2										70	34	48.5714				40	20	50
		Field #3										54	15	27.7778				24	9	37.5
		Field #4										34	15	44.1176				29	11	37.931
		Field #5										30	8	26.6667				31	13	41.9355
		Field #6										50	19	38				33	11	33.3333
		Field #7										59	24	40.678				35	11	31.4286
		Field #8										51	25	49.0196				35	9	25.7143
		Field #9										59	21	35.5932				34	15	44.1176
		Field #10										39	15	38.4615				39	15	38.4615
	Exp #6	Field #1	32	3	9.375				26	3	11.5385
		Field #2	23	3	13.0435				23	2	8.69565
		Field #3	34	2	5.88235				35	4	11.4286
		Field #4	27	5	18.5185				21	3	14.2857
		Field #5	47	3	6.38298				22	2	9.09091
		Field #6	34	3	8.82353				25	4	16
		Field #7	36	4	11.1111				36	8	22.2222
		Field #8	56	3	5.35714				34	2	5.88235
		Field #9	77	5	6.49351				41	5	12.1951
		Field #10	78	8	10.2564				20	3	15
	Exp #7	Field #1	40	3	7.5				93	8	8.60215	71	20	28.169				107	42	39.2523
		Field #2	28	2	7.14286				85	12	14.1176	72	20	27.7778				108	51	47.2222
		Field #3	24	4	16.6667				91	23	25.2747	75	20	26.6667				104	37	35.5769
		Field #4	24	3	12.5				73	17	23.2877	88	20	22.7273				111	44	39.6396
		Field #5	43	4	9.30233				44	6	13.6364	87	37	42.5287				72	39	54.1667
		Field #6	34	5	14.7059				79	22	27.8481	81	32	39.5062				93	37	39.7849
		Field #7	36	5	13.8889				96	10	10.4167	89	36	40.4494				114	41	35.9649
		Field #8	35	6	17.1429				95	14	14.7368	64	32	50				82	40	48.7805
		Field #9	35	4	11.4286				84	13	15.4762	60	30	50				92	41	44.5652
		Field #10	52	8	15.3846				84	14	16.6667	64	32	50				83	31	37.3494
	Exp #8	Field #1	34	4	11.7647				39	4	10.2564	28	11	39.2857				14	4	28.5714
		Field #2	45	4	8.88889				38	3	7.89474	25	9	36				21	5	23.8095
		Field #3	85	9	10.5882				59	10	16.9492	41	12	29.2683				18	5	27.7778
		Field #4	116	15	12.931				73	4	5.47945	18	8	44.4444				22	7	31.8182
		Field #5	91	14	15.3846				50	7	14	44	11	25				58	21	36.2069
		Field #6	77	5	6.49351				47	12	25.5319	31	7	22.5806				63	17	26.9841
		Field #7	61	10	16.3934				51	7	13.7255	36	13	36.1111				50	19	38
		Field #8	58	8	13.7931				28	3	10.7143	53	19	35.8491				20	5	25
		Field #9	89	15	16.8539				70	9	12.8571	30	8	26.6667				21	7	33.3333
		Field #10	91	12	13.1868				67	8	11.9403	35	15	42.8571				43	8	18.6047
ANOVA summary
F	143.8
P value	< 0,0001
P value summary	****
Are differences among means statistically significant? (P < 0.05)	Yes
R square	0.7389
Brown-Forsythe test
F (DFn, DFd)	17,32 (5, 254)
P value	< 0,0001
P value summary	****
Significantly different standard deviations? (P < 0.05)	Yes
Bartlett's test
Bartlett's statistic (corrected)	105.4
P value	< 0,0001
P value summary	****
Significantly different standard deviations? (P < 0.05)	Yes
ANOVA table	SS	DF	MS	F (DFn, DFd)	P value
Treatment (between columns)	49109	5	9822	F (5, 254) = 143,8	P < 0,0001
Residual (within columns)	17350	254	68.31
Total	66458	259
Number of families	1
Number of comparisons per family	15
Alpha	0.05
Bonferroni's multiple comparisons test	Mean Diff,	95% CI of diff,	Significant?	Summary	Adjusted P Value
p27+/+ si ctl vs. p27+/+ si RhoA #1	0.06857	-4,786 to 4,923	No	ns	> 0,9999
p27+/+ si ctl vs. p27+/+ si RhoA #2	-2.598	-7,942 to 2,746	No	ns	> 0,9999
p27+/+ si ctl vs. p27-/- si ctl	-28.32	-32,63 to -24,01	Yes	****	< 0,0001
p27+/+ si ctl vs. p27-/- si RhoA #1	-30.55	-35,90 to -25,21	Yes	****	< 0,0001
p27+/+ si ctl vs. p27-/- si RhoA #2	-24.37	-29,72 to -19,03	Yes	****	< 0,0001
p27+/+ si RhoA #1 vs. p27+/+ si RhoA #2	-2.667	-8,582 to 3,248	No	ns	> 0,9999
p27+/+ si RhoA #1 vs. p27-/- si ctl	-28.39	-33,39 to -23,39	Yes	****	< 0,0001
p27+/+ si RhoA #1 vs. p27-/- si RhoA #1	-30.62	-36,53 to -24,71	Yes	****	< 0,0001
p27+/+ si RhoA #1 vs. p27-/- si RhoA #2	-24.44	-30,36 to -18,53	Yes	****	< 0,0001
p27+/+ si RhoA #2 vs. p27-/- si ctl	-25.72	-31,20 to -20,25	Yes	****	< 0,0001
p27+/+ si RhoA #2 vs. p27-/- si RhoA #1	-27.95	-34,28 to -21,63	Yes	****	< 0,0001
p27+/+ si RhoA #2 vs. p27-/- si RhoA #2	-21.78	-28,10 to -15,45	Yes	****	< 0,0001
p27-/- si ctl vs. p27-/- si RhoA #1	-2.23	-7,706 to 3,246	No	ns	> 0,9999
p27-/- si ctl vs. p27-/- si RhoA #2	3.947	-1,530 to 9,423	No	ns	0.5051
p27-/- si RhoA #1 vs. p27-/- si RhoA #2	6.177	-0,1467 to 12,50	No	ns	0.0619
Test details	Mean 1	Mean 2	Mean Diff,	SE of diff,	n1	n2	t	DF
p27+/+ si ctl vs. p27+/+ si RhoA #1	11.59	11.52	0.06857	1.638	70	40	0.04186	254
p27+/+ si ctl vs. p27+/+ si RhoA #2	11.59	14.19	-2.598	1.804	70	30	1.441	254
p27+/+ si ctl vs. p27-/- si ctl	11.59	39.91	-28.32	1.454	70	60	19.48	254
p27+/+ si ctl vs. p27-/- si RhoA #1	11.59	42.14	-30.55	1.804	70	30	16.94	254
p27+/+ si ctl vs. p27-/- si RhoA #2	11.59	35.96	-24.37	1.804	70	30	13.52	254
p27+/+ si RhoA #1 vs. p27+/+ si RhoA #2	11.52	14.19	-2.667	1.996	40	30	1.336	254
p27+/+ si RhoA #1 vs. p27-/- si ctl	11.52	39.91	-28.39	1.687	40	60	16.83	254
p27+/+ si RhoA #1 vs. p27-/- si RhoA #1	11.52	42.14	-30.62	1.996	40	30	15.34	254
p27+/+ si RhoA #1 vs. p27-/- si RhoA #2	11.52	35.96	-24.44	1.996	40	30	12.25	254
p27+/+ si RhoA #2 vs. p27-/- si ctl	14.19	39.91	-25.72	1.848	30	60	13.92	254
p27+/+ si RhoA #2 vs. p27-/- si RhoA #1	14.19	42.14	-27.95	2.134	30	30	13.1	254
p27+/+ si RhoA #2 vs. p27-/- si RhoA #2	14.19	35.96	-21.78	2.134	30	30	10.2	254
p27-/- si ctl vs. p27-/- si RhoA #1	39.91	42.14	-2.23	1.848	60	30	1.207	254
p27-/- si ctl vs. p27-/- si RhoA #2	39.91	35.96	3.947	1.848	60	30	2.136	254
p27-/- si RhoA #1 vs. p27-/- si RhoA #2	42.14	35.96	6.177	2.134	30	30	2.894	254

## Sheet: Fig 7 -Supp1B
Figure 7 - Supp 1B : Quantification of degraded area per cells after silencing of RhoA
			p27+/+												p27 -/-
			si control				si RhoA #1				si RhoA #2				si control				si RhoA #1				si RhoA #2
			# cells	Sum degraded area (μm²)	Degraded per cells (μm²)	Fold change relative to p27+/+ si control	# cells	Sum degraded area (μm²)	Degraded per cells (μm²)	Fold change relative to p27+/+ si control	# cells	Sum degraded area (μm²)	Degraded per cells (μm²)	Fold change relative to p27+/+ si control	# cells	Sum degraded area (μm²)	Degraded per cells (μm²)	Fold change relative to p27-/- si control	# cells	Sum degraded area (μm²)	Degraded per cells (μm²)	Fold change relative to p27-/- si control	# cells	Sum degraded area (μm²)	Degraded per cells (μm²)	Fold change relative to p27+/+ si control
	Exp #1	Field #1	55	0	0	0	35	126.06	3.60171	1.50968					45	15424.8	342.774	0.9261	27	22707.4	841.014	2.27224
		Field #2	62	0	0	0	43	0	0	0					49	35881.1	732.268	1.97843	57	17058.8	299.277	0.80858
		Field #3	77	831.93	10.8043	4.52867	68	288.05	4.23603	1.77555					55	15668.2	284.877	0.769674	19	11103.5	584.397	1.57891
		Field #4	58	0	0	0	43	686.37	15.9621	6.69059					41	10767.4	262.619	0.709539	31	17516.3	565.044	1.52662
		Field #5	77	141.89	1.84273	0.772388	85	196.08	2.30682	0.966916					59	13324	225.831	0.610144	14	3378.3	241.307	0.651959
		Field #6	88	0	0	0	31	383.7	12.3774	5.18806					57	24366.8	427.488	1.15498	22	30486.3	1385.74	3.74396
		Field #7	73	146.3	2.00411	0.840032	32	0	0	0					74	24890	336.352	0.908749	30	6967.52	232.251	0.62749
		Field #8	89	238.03	2.67449	1.12103	76	1902.46	25.0324	10.4924					75	16779.9	223.732	0.604475	24	3336.81	139.034	0.375638
		Field #9	41	103.15	2.51585	1.05453	61	0	0	0					44	15731.6	357.537	0.965987	18	5668.12	314.896	0.850778
		Field #10	71	285.14	4.01606	1.68335	33	0	0	0					43	21834.8	507.787	1.37193	19	2074.86	109.203	0.295043
		Mean			2.38575												370.126
	Exp #2	Field #1	74	152.79	2.06473	1.80252	73	0	0	0
		Field #2	65	0	0	0	81	150.83	1.8621	1.62562
		Field #3	75	0	0	0	101	0	0	0
		Field #4	77	0	0	0	88	549.83	6.24807	5.4546
		Field #5	86	0	0	0	48	0	0	0
		Field #6	107	0	0	0	25	0	0	0
		Field #7	82	0	0	0	24	316.17	13.1738	11.5008
		Field #8	53	252.84	4.77057	4.16473	33	0	0	0
		Field #9	65	300.26	4.61938	4.03275	37	0	0	0
		Field #10	72	0	0	0	40	206.95	5.17375	4.51671
		Mean			1.14547
	Exp #3	Field #1	95	0	0	0	79	0	0	0					37	3300.06	89.1908	0.843981	53	6570.78	123.977	1.17315
		Field #2	75	251.49	3.3532	3.43178	126	246.64	1.95746	2.00333					51	2062.98	40.4506	0.382769	52	4370.28	84.0438	0.795277
		Field #3	67	0	0	0	112	0	0	0					46	5081.67	110.471	1.04535	37	7301.46	197.337	1.86733
		Field #4	87	0	0	0	63	0	0	0					46	1849.71	40.2111	0.380503	39	5668.61	145.349	1.37539
		Field #5	73	0	0	0	41	0	0	0					43	5430.13	126.282	1.19496	40	2221.42	55.5355	0.525513
		Field #6	79	352.62	4.46354	4.56814	46	0	0	0					50	5659.9	113.198	1.07115	19	4359.97	229.472	2.17141
		Field #7	88	0	0	0	53	582.274	10.9863	11.2438					48	13709.5	285.615	2.70267	20	4250.51	212.526	2.01105
		Field #8	55	0	0	0	115	0	0	0					44	5488.67	124.742	1.18039	45	3213.52	71.4116	0.675742
		Field #9	86	0	0	0	69	457.47	6.63	6.78536					38	2479.35	65.2461	0.6174	24	2169.51	90.3963	0.855387
		Field #10	49	95.76	1.95429	2.00008	89	0	0	0					42	2577.95	61.3798	0.580815	48	1860.61	38.7627	0.366798
		Mean			0.977103												105.679
	Exp #4	Field #1	55	271.69	4.93982	2.37542	62	25.6	0.412903	0.198554					77	12101.5	157.163	1.79321	36	18582.5	516.18	5.88955
		Field #2	62	0	0	0	72	43.6	0.605556	0.291195					55	3923.39	71.3344	0.813916	20	1656.22	82.811	0.944863
		Field #3	46	83.93	1.82457	0.877383	69	0	0	0					49	4725.25	96.4337	1.1003	25	1382.25	55.29	0.630852
		Field #4	48	154.6	3.22083	1.54881	63	23.35	0.370635	0.178228					62	12802.7	206.496	2.35609	39	355.84	9.1241	0.104105
		Field #5	130	214.36	1.64892	0.792922	57	38.28	0.671579	0.322944					49	2156.04	44.0008	0.502044	25	446.45	17.858	0.203758
		Field #6	61	26.64	0.436721	0.210007	42	0	0	0					69	4346.29	62.9897	0.718705	21	14027.1	667.956	7.6213
		Field #7	65	0	0	0	46	98.41	2.13935	1.02875					56	5654.46	100.973	1.15208	36	6117.3	169.925	1.93882
		Field #8	31	107.24	3.45935	1.66351	71	0	0	0					33	2021.09	61.2452	0.6988	25	4003.03	160.121	1.82696
		Field #9	57	115.93	2.03386	0.978027	41	17.95	0.437805	0.210528					50	1785.77	35.7154	0.407508	29	2871.09	99.0031	1.12961
		Field #10	55	177.73	3.23145	1.55392	48	0	0	0					71	2845.93	40.0835	0.457348	29	5857.17	201.971	2.30447
		Mean			2.07955												87.6434
	Exp #5	Field #1													46	9241.14	200.894	1.11495					23	4819.59	209.547	1.16297
		Field #2													70	10619.4	151.706	0.841955					40	10850.4	271.259	1.50546
		Field #3													54	5784.74	107.125	0.594533					24	3824.06	159.336	0.8843
		Field #4													34	8605.76	253.111	1.40474					29	11865.2	409.143	2.27071
		Field #5													30	8141.87	271.396	1.50622					31	15049.2	485.458	2.69425
		Field #6													50	10505.8	210.115	1.16612					33	15700.8	475.782	2.64055
		Field #7													59	9306.61	157.739	0.875438					35	5692.76	162.65	0.902694
		Field #8													51	4490.71	88.0531	0.488687					35	5537.41	158.212	0.878061
		Field #9													59	5054.42	85.6681	0.47545					34	6654.22	195.712	1.08619
		Field #10													39	10764.9	276.024	1.53191					39	13878.6	355.862	1.975
		Mean															180.183
	Exp #6	Field #1	32	57.12	1.785	0.790813					26	690.69	26.565	11.7692
		Field #2	23	0	0	0					23	62.67	2.72478	1.20717
		Field #3	34	262.55	7.72206	3.42112					35	0	0	0
		Field #4	27	0	0	0					21	79.19	3.77095	1.67065
		Field #5	47	266.46	5.66936	2.51171					22	77.42	3.51909	1.55907
		Field #6	34	0	0	0					25	0	0	0
		Field #7	36	80.13	2.22583	0.986116					36	69.04	1.91778	0.849637
		Field #8	56	179.73	3.20946	1.4219					34	57.84	1.70118	0.753676
		Field #9	77	0	0	0					41	264.76	6.45756	2.86091
		Field #10	78	152.88	1.96	0.868343					20	0	0	0
		Mean			2.25717
	Exp #7	Field #1	40	659.02	16.4755	4.27014					93	63.94	0.687527	0.178194	71	18675.3	263.033	1.43748					107	14829.6	138.595	0.757425
		Field #2	28	70.27	2.50964	0.650453					85	117.11	1.37776	0.357091	72	3917.85	54.4146	0.297377					108	20430.2	189.168	1.03381
		Field #3	24	0	0	0					91	1587.3	17.4429	4.52086	75	10080.2	134.403	0.734517					104	17066.6	164.102	0.896824
		Field #4	24	98.86	4.11917	1.06761					73	1088.89	14.9163	3.86603	88	6229.11	70.7853	0.386844					111	20295.4	182.842	0.999235
		Field #5	43	386.67	8.99233	2.33064					44	55.4	1.25909	0.326333	87	15086.3	173.406	0.947669					72	36392.5	505.451	2.7623
		Field #6	34	0	0	0					79	95.26	1.20582	0.312527	81	9508.34	117.387	0.641523					93	35168.1	378.152	2.06661
		Field #7	36	128.48	3.56889	0.924989					96	206.22	2.14812	0.556754	89	11269.9	126.628	0.692027					114	20116.2	176.458	0.964348
		Field #8	35	0	0	0					95	185.5	1.95263	0.506086	64	18663.8	291.623	1.59373					82	8184.49	99.8109	0.545469
		Field #9	35	0	0	0					84	282.68	3.36524	0.872207	60	9812.14	163.536	0.893727					92	23578	256.282	1.40059
		Field #10	52	151.71	2.9175	0.756162					84	160.79	1.91417	0.496116	64	27814.5	434.602	2.37511					83	22876.7	275.623	1.50629
		Mean			3.8583												182.982
	Exp #8	Field #1	34	30.71	0.903235	0.401427					39	43.14	1.10615	0.491611	28	16569	591.749	1.18014					14	8731.38	623.67	1.2438
		Field #2	45	222.16	4.93689	2.19411					38	81.51	2.145	0.953308	25	16006.3	640.253	1.27688					21	8182.67	389.651	0.777092
		Field #3	85	375.13	4.41329	1.96141					59	218.43	3.7022	1.64538	41	19183.9	467.9	0.933147					18	1163.5	64.6389	0.128911
		Field #4	116	461.75	3.9806	1.76911					73	305.64	4.18685	1.86077	18	12151.3	675.07	1.34631					22	4529.77	205.899	0.41063
		Field #5	91	223.29	2.45374	1.09052					50	189.64	3.7928	1.68564	44	23110.5	525.238	1.0475					58	13770.2	237.418	0.473489
		Field #6	77	0	0	0					47	81.21	1.72787	0.767923	31	17256.3	556.655	1.11015					63	17855.1	283.415	0.565222
		Field #7	61	313.24	5.13508	2.2822					51	151.22	2.9651	1.31779	36	10505.1	291.808	0.581961					50	11512.9	230.257	0.459209
		Field #8	58	39.31	0.677759	0.301218					28	101.01	3.6075	1.60329	53	12026	226.906	0.452525					20	5795.46	289.773	0.577903
		Field #9	89	0	0	0					70	294.8	4.21143	1.8717	30	11490.8	383.025	0.763878					21	8976.07	427.432	0.85244
		Field #10	91	0	0	0					67	539.49	8.05209	3.57861	35	22946.5	655.614	1.30751					43	17280.7	401.876	0.801473
		Mean			2.25006												501.422
ANOVA summary
F	1.705
P value	0.1339
P value summary	ns
Are differences among means statistically significant? (P < 0.05)	No
R square	0.03247
Brown-Forsythe test
F (DFn, DFd)	4,267 (5, 254)
P value	0.001
P value summary	***
Significantly different standard deviations? (P < 0.05)	Yes
Bartlett's test
Bartlett's statistic (corrected)	183
P value	< 0,0001
P value summary	****
Significantly different standard deviations? (P < 0.05)	Yes
ANOVA table	SS
Treatment (between columns)	26.52
Residual (within columns)	790.2
Total	816.8
Number of families	1
Number of comparisons per family	15
Alpha	0.05
Bonferroni's multiple comparisons test	Mean Diff,	95% CI of diff,	Significant?	Summary	Adjusted P Value
p27+/+ si ctl vs. p27+/+ si RhoA #1	-0.8002	-1,836 to 0,2358	No	ns	0.3437
p27+/+ si ctl vs. p27+/+ si RhoA #2	-0.5754	-1,716 to 0,5651	No	ns	> 0,9999
p27+/+ si ctl vs. p27-/- si ctl	-0.0002619	-0,9198 to 0,9193	No	ns	> 0,9999
p27+/+ si ctl vs. p27-/- si RhoA #1	-0.5724	-1,713 to 0,5681	No	ns	> 0,9999
p27+/+ si ctl vs. p27-/- si RhoA #2	-0.1744	-1,315 to 0,9661	No	ns	> 0,9999
p27+/+ si RhoA #1 vs. p27+/+ si RhoA #2	0.2248	-1,038 to 1,487	No	ns	> 0,9999
p27+/+ si RhoA #1 vs. p27-/- si ctl	0.7999	-0,2670 to 1,867	No	ns	0.4078
p27+/+ si RhoA #1 vs. p27-/- si RhoA #1	0.2278	-1,035 to 1,490	No	ns	> 0,9999
p27+/+ si RhoA #1 vs. p27-/- si RhoA #2	0.6258	-0,6366 to 1,888	No	ns	> 0,9999
p27+/+ si RhoA #2 vs. p27-/- si ctl	0.5752	-0,5936 to 1,744	No	ns	> 0,9999
p27+/+ si RhoA #2 vs. p27-/- si RhoA #1	0.003	-1,347 to 1,353	No	ns	> 0,9999
p27+/+ si RhoA #2 vs. p27-/- si RhoA #2	0.401	-0,9485 to 1,751	No	ns	> 0,9999
p27-/- si ctl vs. p27-/- si RhoA #1	-0.5722	-1,741 to 0,5966	No	ns	> 0,9999
p27-/- si ctl vs. p27-/- si RhoA #2	-0.1742	-1,343 to 0,9946	No	ns	> 0,9999
p27-/- si RhoA #1 vs. p27-/- si RhoA #2	0.398	-0,9515 to 1,748	No	ns	> 0,9999
Test details	Mean 1	Mean 2	Mean Diff,	SE of diff,	n1	n2	t	DF
p27+/+ si ctl vs. p27+/+ si RhoA #1	0.9996	1.8	-0.8002	0.3496	70	40	2.289	254
p27+/+ si ctl vs. p27+/+ si RhoA #2	0.9996	1.575	-0.5754	0.3849	70	30	1.495	254
p27+/+ si ctl vs. p27-/- si ctl	0.9996	0.9998	-0.0002619	0.3103	70	60	0.000844	254
p27+/+ si ctl vs. p27-/- si RhoA #1	0.9996	1.572	-0.5724	0.3849	70	30	1.487	254
p27+/+ si ctl vs. p27-/- si RhoA #2	0.9996	1.174	-0.1744	0.3849	70	30	0.4532	254
p27+/+ si RhoA #1 vs. p27+/+ si RhoA #2	1.8	1.575	0.2248	0.426	40	30	0.5276	254
p27+/+ si RhoA #1 vs. p27-/- si ctl	1.8	0.9998	0.7999	0.36	40	60	2.222	254
p27+/+ si RhoA #1 vs. p27-/- si RhoA #1	1.8	1.572	0.2278	0.426	40	30	0.5346	254
p27+/+ si RhoA #1 vs. p27-/- si RhoA #2	1.8	1.174	0.6258	0.426	40	30	1.469	254
p27+/+ si RhoA #2 vs. p27-/- si ctl	1.575	0.9998	0.5752	0.3944	30	60	1.458	254
p27+/+ si RhoA #2 vs. p27-/- si RhoA #1	1.575	1.572	0.003	0.4554	30	30	0.006587	254
p27+/+ si RhoA #2 vs. p27-/- si RhoA #2	1.575	1.174	0.401	0.4554	30	30	0.8805	254
p27-/- si ctl vs. p27-/- si RhoA #1	0.9998	1.572	-0.5722	0.3944	60	30	1.451	254
p27-/- si ctl vs. p27-/- si RhoA #2	0.9998	1.174	-0.1742	0.3944	60	30	0.4416	254
p27-/- si RhoA #1 vs. p27-/- si RhoA #2	1.572	1.174	0.398	0.4554	30	30	0.8739	254

## Sheet: Fig 7 - Supp 1D
Fig 7 suppl 1D: Invasion after Y27632 treatment
		p27+/+				p27-/-
		-		Y27632		-		Y27632
		DO	Fold change (from mean of empty)	DO	Fold change (from mean of empty)	DO	Fold change (from mean of empty)	DO	Fold change (from mean of empty)
	Exp #1	0.13	0.485075	0.387	1.44403	0.641	1.13451	0.65	1.15044
		0.406	1.51493	0.292	1.08955	0.489	0.865487	0.628	1.1115
	Exp #2	0.439	1.14026	0.366	0.950649	0.211	0.732639	0.29	1.00694
		0.331	0.85974	0.339	0.880519	0.365	1.26736	0.215	0.746528
	Exp #3					0.784	1.14369	0.673	0.981765
						0.587	0.856309	0.641	0.935084
	Exp #4	0.631	1.76999	0.496	1.3913
		0.082	0.230014	0.138	0.387097
ANOVA summary
F	0.009336
P value	0.9987
P value summary	ns
Are differences among means statistically significant? (P < 0.05)	No
R square	0.001398
Brown-Forsythe test
F (DFn, DFd)	4,301 (3, 20)
P value	0.017
P value summary	*
Significantly different standard deviations? (P < 0.05)	Yes
Bartlett's test
Bartlett's statistic (corrected)	9.807
P value	0.0203
P value summary	*
Significantly different standard deviations? (P < 0.05)	Yes
ANOVA table	SS	DF	MS	F (DFn, DFd)	P value
Treatment (between columns)	0.003957	3	0.001319	F (3, 20) = 0,009336	P = 0,9987
Residual (within columns)	2.826	20	0.1413
Total	2.83	23
Number of families	1
Number of comparisons per family	6
Alpha	0.05
Bonferroni's multiple comparisons test	Mean Diff,	95% CI of diff,	Significant?	Summary	Adjusted P Value
p27+/+ - vs. p27+/+ Y27632	-0.024	-0,6592 to 0,6112	No	ns	> 0,9999
p27+/+ - vs. p27-/- -	-2.484e-09	-0,6352 to 0,6352	No	ns	> 0,9999
p27+/+ - vs. p27-/- Y27632	0.01117	-0,6241 to 0,6464	No	ns	> 0,9999
p27+/+ Y27632 vs. p27-/- -	0.024	-0,6112 to 0,6592	No	ns	> 0,9999
p27+/+ Y27632 vs. p27-/- Y27632	0.03517	-0,6001 to 0,6704	No	ns	> 0,9999
p27-/- - vs. p27-/- Y27632	0.01117	-0,6241 to 0,6464	No	ns	> 0,9999
Test details	Mean 1	Mean 2	Mean Diff,	SE of diff,	n1	n2	t	DF
p27+/+ - vs. p27+/+ Y27632	1	1.024	-0.024	0.217	6	6	0.1106	20
p27+/+ - vs. p27-/- -	1	1	-2.484e-09	0.217	6	6	1.144e-08	20
p27+/+ - vs. p27-/- Y27632	1	0.9888	0.01117	0.217	6	6	0.05145	20
p27+/+ Y27632 vs. p27-/- -	1.024	1	0.024	0.217	6	6	0.1106	20
p27+/+ Y27632 vs. p27-/- Y27632	1.024	0.9888	0.03517	0.217	6	6	0.162	20
p27-/- - vs. p27-/- Y27632	1	0.9888	0.01117	0.217	6	6	0.05145	20
