# Supplementary material for: p27Kip1 promotes invadopodia turnover and invasion through the regulation of the PAK1/Cortactin pathway
Source: eLife. 2017 Mar 13;6:e22207. doi: 10.7554/eLife.22207 (PMC5388532; doi:10.7554/eLife.22207)
Supplement: Figure 8—source data 1. — DOI: http://dx.doi.org/10.7554/eLife.22207.033 [file elife-22207-fig8-data1.xlsx]

## Sheet: Fig 8B
Figure 8B: Quantification of cells with invadopodia after infection with S113 phospho-mutants of Cortactin (p27+/+)
			Cortactin WT			Cortactin S113A			Cortactin S113D
			# cells	# Cells with invadopodia	% of invadopodia forming cells	# cells	# Cells with invadopodia	% of invadopodia forming cells	# cells	# Cells with invadopodia	% of invadopodia forming cells
	Exp #1	Field #1				25	3	12	15	2	13.3333
		Field #2				22	1	4.54545	25	2	8
		Field #3				38	4	10.5263	14	0	0
		Field #4				20	2	10	16	2	12.5
		Field #5				28	3	10.7143	22	3	13.6364
		Field #6				26	3	11.5385	21	2	9.52381
		Field #7				23	3	13.0435	18	1	5.55556
		Field #8				22	3	13.6364	17	1	5.88235
		Field #9				25	3	12	22	2	9.09091
		Field #10				19	0	0	19	1	5.26316
	Exp #2	Field #1	53	3	5.66038	45	4	8.88889	41	2	4.87805
		Field #2	23	1	4.34783	41	3	7.31707	43	3	6.97674
		Field #3	40	5	12.5	43	4	9.30233	48	3	6.25
		Field #4	32	2	6.25	48	3	6.25	39	2	5.12821
		Field #5	31	1	3.22581	78	6	7.69231	22	2	9.09091
		Field #6	32	1	3.125	57	4	7.01754	29	2	6.89655
		Field #7	81	4	4.93827	50	2	4	44	5	11.3636
		Field #8	46	6	13.0435	53	2	3.77358	24	3	12.5
		Field #9	59	7	11.8644	34	5	14.7059	39	0	0
		Field #10	67	3	4.47761	32	3	9.375	26	3	11.5385
	Exp #3	Field #1	54	5	9.25926	41	5	12.1951	67	6	8.95522
		Field #2	34	6	17.6471	46	5	10.8696	131	10	7.63359
		Field #3	55	4	7.27273	29	2	6.89655	30	1	3.33333
		Field #4	64	6	9.375	72	12	16.6667	27	1	3.7037
		Field #5	40	4	10	79	8	10.1266	23	3	13.0435
		Field #6	32	1	3.125	70	6	8.57143	31	1	3.22581
		Field #7	30	5	16.6667	58	4	6.89655	33	6	18.1818
		Field #8	33	1	3.0303	46	10	21.7391	28	3	10.7143
		Field #9	32	2	6.25	47	9	19.1489	109	7	6.42202
		Field #10	50	6	12	25	7	28	76	6	7.89474
	Exp #4	Field #1	24	4	16.6667	90	17	18.8889	29	2	6.89655
		Field #2	28	2	7.14286	31	12	38.7097	51	5	9.80392
		Field #3	34	6	17.6471	63	14	22.2222	23	2	8.69565
		Field #4	28	3	10.7143	49	10	20.4082	30	6	20
		Field #5	30	3	10	34	10	29.4118	42	2	4.7619
		Field #6	19	2	10.5263	74	10	13.5135	20	4	20
		Field #7	32	3	9.375	46	11	23.913	54	3	5.55556
		Field #8	26	7	26.9231	31	6	19.3548	31	3	9.67742
		Field #9	22	6	27.2727	62	9	14.5161	45	5	11.1111
		Field #10	25	3	12	51	11	21.5686	45	3	6.66667
	Exp #5	Field #1	41	2	4.87805				33	2	6.06061
		Field #2	66	9	13.6364				47	6	12.766
		Field #3	32	4	12.5				62	6	9.67742
		Field #4	46	3	6.52174				48	6	12.5
		Field #5	42	2	4.7619				76	5	6.57895
		Field #6	40	5	12.5				30	6	20
		Field #7	29	5	17.2414				50	5	10
		Field #8	42	3	7.14286				49	3	6.12245
		Field #9	48	4	8.33333				30	3	10
		Field #10	28	2	7.14286				48	3	6.25
ANOVA summary
F	6.581
P value	0.0019
P value summary	**
Are differences among means statistically significant? (P < 0.05)	Yes
R square	0.0939
Brown-Forsythe test
F (DFn, DFd)	3,553 (2, 127)
P value	0.0315
P value summary	*
Significantly different standard deviations? (P < 0.05)	Yes
Bartlett's test
Bartlett's statistic (corrected)	13.4
P value	0.0012
P value summary	**
Significantly different standard deviations? (P < 0.05)	Yes
ANOVA table	SS	DF	MS	F (DFn, DFd)	P value
Treatment (between columns)	489.7	2	244.8	F (2, 127) = 6,581	P = 0,0019
Residual (within columns)	4725	127	37.21
Total	5215	129
Bonferroni's multiple comparisons test	Mean Diff,	95% CI of diff,	Significant?	Summary	Adjusted P Value
WT vs. S113A	-3.325	-6,419 to -0,2312	Yes	*	0.0323
WT vs. S113D	1.292	-1,643 to 4,227	No	ns	0.6399
Test details	Mean 1	Mean 2	Mean Diff,	SE of diff,	n1	n2	t	DF
WT vs. S113A	10.17	13.5	-3.325	1.364	40	40	2.438	127
WT vs. S113D	10.17	8.878	1.292	1.294	40	50	0.9985	127

## Sheet: Fig 8C
Figure 8C: Quantification of cells with invadopodia after infection with S113 phospho-mutants of Cortactin (p27-/-)
			Cortactin WT			Cortactin S113A			Cortactin S113D
			# cells	# Cells with invadopodia	% of invadopodia forming cells	# cells	# Cells with invadopodia	% of invadopodia forming cells	# cells	# Cells with invadopodia	% of invadopodia forming cells
	Exp #1	Field #1	31	8	25.8065	42	12	28.5714	35	9	25.7143
		Field #2	31	10	32.2581	40	17	42.5	23	2	8.69565
		Field #3	27	10	37.037	29	13	44.8276	25	3	12
		Field #4	19	10	52.6316	26	9	34.6154	24	2	8.33333
		Field #5	18	8	44.4444	28	13	46.4286	32	7	21.875
		Field #6	25	10	40	19	11	57.8947	26	5	19.2308
		Field #7	19	7	36.8421	25	10	40	24	5	20.8333
		Field #8	24	7	29.1667	19	6	31.5789	12	1	8.33333
		Field #9	15	4	26.6667	20	9	45	25	3	12
		Field #10	21	7	33.3333	28	12	42.8571	14	2	14.2857
	Exp #2	Field #1	43	20	46.5116	17	10	58.8235	50	12	24
		Field #2	53	21	39.6226	23	8	34.7826	50	19	38
		Field #3	28	16	57.1429	19	8	42.1053	45	11	24.4444
		Field #4	23	13	56.5217	25	11	44	47	8	17.0213
		Field #5	36	16	44.4444	24	8	33.3333	53	17	32.0755
		Field #6	38	16	42.1053	22	11	50	49	11	22.449
		Field #7	36	10	27.7778	19	9	47.3684	50	20	40
		Field #8	30	16	53.3333	17	7	41.1765	63	14	22.2222
		Field #9	41	15	36.5854	24	12	50	43	10	23.2558
		Field #10	41	21	51.2195	24	9	37.5	66	18	27.2727
	Exp #3	Field #1	13	5	38.4615	26	6	23.0769	43	10	23.2558
		Field #2	31	9	29.0323	22	6	27.2727	33	6	18.1818
		Field #3	27	8	29.6296	18	4	22.2222	35	7	20
		Field #4	19	7	36.8421	17	4	23.5294	58	10	17.2414
		Field #5	18	9	50	19	9	47.3684	34	4	11.7647
		Field #6	19	7	36.8421	18	5	27.7778	67	20	29.8507
		Field #7	19	5	26.3158	21	8	38.0952	48	6	12.5
		Field #8	35	16	45.7143	27	11	40.7407	41	6	14.6341
		Field #9	36	13	36.1111	48	14	29.1667	55	13	23.6364
		Field #10	20	9	45	51	16	31.3725	58	9	15.5172
ANOVA summary
F	43.57
P value	< 0,0001
P value summary	****
Are differences among means statistically significant? (P < 0.05)	Yes
R square	0.5004
Brown-Forsythe test
F (DFn, DFd)	0,7525 (2, 87)
P value	0.4742
P value summary	ns
Significantly different standard deviations? (P < 0.05)	No
Bartlett's test
Bartlett's statistic (corrected)	1.048
P value	0.592
P value summary	ns
Significantly different standard deviations? (P < 0.05)	No
ANOVA table	SS	DF	MS	F (DFn, DFd)	P value
Treatment (between columns)	7154	2	3577	F (2, 87) = 43,57	P < 0,0001
Residual (within columns)	7143	87	82.1
Total	14297	89
Bonferroni's multiple comparisons test	Mean Diff,	95% CI of diff,	Significant?	Summary	Adjusted P Value
WT vs. S113A	0.7633	-4,573 to 6,099	No	ns	> 0,9999
WT vs. S113D	19.28	13,95 to 24,62	Yes	****	< 0,0001
Test details	Mean 1	Mean 2	Mean Diff,	SE of diff,	n1	n2	t	DF
WT vs. S113A	39.57	38.8	0.7633	2.339	30	30	0.3263	87
WT vs. S113D	39.57	20.28	19.28	2.339	30	30	8.243	87

## Sheet: Fig 8D
Figure 8D: Quantification of degraded gelatin area after infection with S113 phospho-mutants of Cortactin (p27+/+)
			Cortactin WT				Cortactin S113A				Cortactin S113D
			# cells	Sum degraded area (μm²)	Degraded per cells (μm²)	Fold change relative to Cortactin WT	# cells	Sum degraded area (μm²)	Degraded per cells (μm²)	Fold change relative to Cortactin WT	# cells	Sum degraded area (μm²)	Degraded per cells (μm²)	Fold change relative to Cortactin WT
	Exp #1	Field #1	53	0	0	0	45	0	0	0
		Field #2	23	190.33	8.27522	7.86123	41	0	0	0
		Field #3	40	0	0	0	43	71.17	1.65512	1.57232
		Field #4	32	0	0	0	48	68.5	1.42708	1.35569
		Field #5	31	29.73	0.959032	0.911055	78	0	0	0
		Field #6	32	30.49	0.952812	0.905146	57	120.05	2.10614	2.00078
		Field #7	81	0	0	0	50	0	0	0
		Field #8	46	0	0	0	53	0	0	0
		Field #9	59	0	0	0	34	0	0	0
		Field #10	67	22.75	0.339552	0.322565	32	0	0	0
		Mean			1.05266
	Exp #2	Field #1	54	0	0	0	41	1038.67	25.3334	52.5475	67	161.52	2.41075	5.00046
		Field #2	34	0	0	0	46	0	0	0	131	153.75	1.17366	2.43446
		Field #3	55	0	0	0	29	0	0	0	30	0	0	0
		Field #4	64	36.78	0.574688	1.19204	72	0	0	0	27	0	0	0
		Field #5	40	0	0	0	79	175.49	2.22139	4.60769	23	318.38	13.8426	28.7128
		Field #6	32	84.48	2.64	5.47598	70	0	0	0	31	239.62	7.72968	16.0332
		Field #7	30	0	0	0	58	0	0	0	33	0	0	0
		Field #8	33	53.01	1.60636	3.33198	46	0	0	0	28	0	0	0
		Field #9	32	0	0	0	47	0	0	0	109	0	0	0
		Field #10	50	0	0	0	25	112.35	4.494	9.32162	76	0	0	0
		Mean			0.482105
	Exp #3	Field #1	24	2430.95	101.29	4.78363	90	295.84	3.28711	0.155241	29	45.91	1.5831	0.0747657
		Field #2	28	0	0	0	31	1165.85	37.6081	1.77613	51	0	0	0
		Field #3	34	1142.2	33.5941	1.58656	63	0	0	0	23	0	0	0
		Field #4	28	0	0	0	49	2912.15	59.4316	2.80679	30	138.43	4.61433	0.217922
		Field #5	30	91.99	3.06633	0.144815	34	0	0	0	42	234.54	5.58429	0.263731
		Field #6	19	565.68	29.7726	1.40608	74	387.88	5.24162	0.247547	20	144.26	7.213	0.34065
		Field #7	32	602.44	18.8263	0.889112	46	1309.25	28.462	1.34418	54	181.6	3.36296	0.158824
		Field #8	26	0	0	0	31	657.27	21.2023	1.00132	31	0	0	0
		Field #9	22	230.99	10.4995	0.495865	62	467.68	7.54323	0.356246	45	0	0	0
		Field #10	25	367.34	14.6936	0.693939	51	0	0	0	45	0	0	0
		Mean			21.1742
	Exp #4	Field #1	41	1248.55	30.4524	3.39488					33	0	0	0
		Field #2	66	190.03	2.87924	0.320982					47	164.62	3.50255	0.39047
		Field #3	32	0	0	0					62	0	0	0
		Field #4	46	0	0	0					48	80.49	1.67687	0.186941
		Field #5	42	73.86	1.75857	0.196048					76	0	0	0
		Field #6	40	150.36	3.759	0.419059					30	0	0	0
		Field #7	29	256.61	8.84862	0.986458					50	0	0	0
		Field #8	42	1764.13	42.0031	4.68257					49	0	0	0
		Field #9	48	0	0	0					30	0	0	0
		Field #10	28	0	0	0					48	127.73	2.66104	0.296657
		Mean			8.9701
	Exp #5	Field #1	32	789.06	24.6581	0.578223	110	1720.55	15.6414	0.366783	78	0	0	0
		Field #2	37	720.34	19.4686	0.456532	82	1502.45	18.3226	0.429656	59	0	0	0
		Field #3	29	1691.48	58.3269	1.36774	87	8987.31	103.302	2.4224	69	5787.83	83.8816	1.96699
		Field #4	15	0	0	0	71	0	0	0	116	75.2	0.648276	0.0152018
		Field #5	57	1291.74	22.6621	0.531417	80	717.54	8.96925	0.210325	112	0	0	0
		Field #6	29	2182.31	75.2521	1.76463	75	0	0	0	71	903.56	12.7262	0.298424
		Field #7	29	5316.57	183.33	4.29901	59	0	0	0	54	0	0	0
		Field #8	20	712.02	35.601	0.834829	80	2824.14	35.3017	0.827811	84	1824.03	21.7146	0.509199
		Field #9	25	178.7	7.148	0.167618	58	885.02	15.259	0.357816	110	320.44	2.91309	0.0683108
		Field #10	49	0	0	0	71	1013.98	14.2814	0.334893	50	0	0	0
		Mean			42.6447
	Exp #6	Field #1	40	41.81	1.04525	0.465456	83	2149.27	25.8948	11.5311	54	31.78	0.588519	0.262071
		Field #2	63	265.55	4.21508	1.877	74	2086.62	28.1976	12.5565	79	187.52	2.37367	1.05701
		Field #3	47	68.27	1.45255	0.64683	73	606.95	8.31438	3.70244	78	404.67	5.18808	2.31028
		Field #4	36	0	0	0	36	1018.65	28.2958	12.6003	89	0	0	0
		Field #5	81	116.22	1.43481	0.638931	42	2104.39	50.1045	22.3118	89	34.68	0.389663	0.173519
		Field #6	88	98.26	1.11659	0.497224	92	677.86	7.36804	3.28103	100	0	0	0
		Field #7	34	212.98	6.26412	2.78945	61	0	0	0	142	0	0	0
		Field #8	91	207.97	2.28538	1.01769	137	603.06	4.4019	1.96019	105	219.63	2.09171	0.931452
		Field #9	83	187.44	2.25831	1.00564	95	3186.66	33.5438	14.9372	74	234.43	3.16797	1.41072
		Field #10	57	135.91	2.38439	1.06178	80	783.85	9.79812	4.36316	64	0	0	0
		Mean			2.24565
	Exp #7	Field #1	42	77.03	1.83405	0.819745	53	182.52	3.44377	1.53923	49	30.61	0.624694	0.279213
		Field #2	73	93.34	1.27863	0.571496	45	336.14	7.46978	3.33869	23	25.63	1.11435	0.498068
		Field #3	62	440.49	7.10468	3.1755	37	1082.43	29.2549	13.0757	67	0	0	0
		Field #4	70	275.4	3.93429	1.75847	45	590.46	13.1213	5.8647	71	111.54	1.57099	0.702167
		Field #5	53	90.68	1.71094	0.764722	102	1349.05	13.226	5.91148	38	155.13	4.08237	1.82465
		Field #6	46	50.62	1.10043	0.49185	60	2847.45	47.4575	21.2116	76	100.6	1.32368	0.591633
		Field #7	81	160.24	1.97827	0.884207	21	587.51	27.9767	12.5044	48	119.74	2.49458	1.11498
		Field #8	77	0	0	0	45	862.05	19.1567	8.56225	35	0	0	0
		Field #9	53	145.18	2.73925	1.22433	47	3613.98	76.8932	34.3681	30	0	0	0
		Field #10	70	48.5	0.692857	0.309679	56	2248.22	40.1468	17.944	33	261.68	7.9297	3.54425
		Mean			2.23734
	Exp #8	Field #1	76	145.66	1.91658	0.935893	34	428.13	12.5921	6.14888	49	82.09	1.67531	0.818076
		Field #2	59	0	0	0	50	1744.6	34.892	17.0383	52	96.2	1.85	0.903381
		Field #3	64	66.24	1.035	0.505405	31	869.2	28.0387	13.6917	45	105.28	2.33956	1.14244
		Field #4	39	193.86	4.97077	2.4273	36	591.29	16.4247	8.02043	41	0	0	0
		Field #5	38	52.14	1.37211	0.670019	46	139.93	3.04196	1.48543	53	58.32	1.10038	0.53733
		Field #6	38	125.41	3.30026	1.61157	34	1828.62	53.7829	26.263	49	40.65	0.829592	0.405102
		Field #7	50	31.22	0.6244	0.304903	37	1556.16	42.0584	20.5377	37	0	0	0
		Field #8	51	119.7	2.34706	1.1461	52	653.07	12.559	6.13276	58	70.2	1.21034	0.591029
		Field #9	89	59.2	0.665169	0.324811	55	675.5	12.2818	5.99739	95	16.56	0.174316	0.0851209
		Field #10	77	327.04	4.24727	2.074	44	2790.47	63.4198	30.9688	71	102.8	1.44789	0.707024
		Mean			2.04786
ANOVA summary
F	18.44
P value	< 0,0001
P value summary	****
Are differences among means statistically significant? (P < 0.05)	Yes
R square	0.1459
Brown-Forsythe test
F (DFn, DFd)	19,48 (2, 216)
P value	< 0,0001
P value summary	****
Significantly different standard deviations? (P < 0.05)	Yes
Bartlett's test
Bartlett's statistic (corrected)	225
P value	< 0,0001
P value summary	****
Significantly different standard deviations? (P < 0.05)	Yes
ANOVA table	SS	DF	MS	F (DFn, DFd)	P value
Treatment (between columns)	1301	2	650.3	F (2, 216) = 18,44	P < 0,0001
Residual (within columns)	7617	216	35.26
Total	8917	218
Bonferroni's multiple comparisons test	Mean Diff,	95% CI of diff,	Significant?	Summary	Adjusted P Value
WT vs. S113A	-5.17	-7,363 to -2,976	Yes	****	< 0,0001
WT vs. S113D	0.1187	-2,083 to 2,321	No	ns	> 0,9999
Test details	Mean 1	Mean 2	Mean Diff,	SE of diff,	n1	n2	t	DF
WT vs. S113A	1	6.17	-5.17	0.9719	80	70	5.32	216
WT vs. S113D	1	0.8814	0.1187	0.9756	80	69	0.1216	216

## Sheet: Fig 8E
Figure 8E: Quantification of degraded area after infection with S113 phospho-mutants of Cortactin (p27-/-)
			Cortactin WT				Cortactin S113A				Cortactin S113D
			# cells	Sum degraded area (μm²)	Degraded per cells (μm²)	Fold change relative to Cortactin WT	# cells	Sum degraded area (μm²)	Degraded per cells (μm²)	Fold change relative to Cortactin WT	# cells	Sum degraded area (μm²)	Degraded per cells (μm²)	Fold change relative to Cortactin WT
	Exp #1	Field #1	31	10591.8	341.671	0.956136	42	10616.3	252.77	0.707355	35	0	0	0
		Field #2	31	3601.09	116.164	0.325075	40	7090.44	177.261	0.496049	23	3066.61	133.331	0.373115
		Field #3	27	7444.73	275.731	0.771608	29	7438.69	256.507	0.717811	25	1496.15	59.846	0.167474
		Field #4	19	14666.3	771.91	2.16012	26	9637.56	370.675	1.0373	24	3459.22	144.134	0.403347
		Field #5	18	18555.8	1030.88	2.88482	28	15720.8	561.457	1.57119	32	2113.37	66.0428	0.184815
		Field #6	25	4487.8	179.512	0.502349	19	4867.65	256.192	0.716931	26	7435.46	285.979	0.800288
		Field #7	19	2853.35	150.176	0.420255	25	5277.32	211.093	0.590725	24	7250.7	302.113	0.845436
		Field #8	24	7905.62	329.401	0.9218	19	3262.69	171.721	0.480545	12	1365.78	113.815	0.318501
		Field #9	15	3792.5	252.833	0.707532	20	3352.2	167.61	0.469042	25	2094.1	83.764	0.234406
		Field #10	21	2628.76	125.179	0.350303	28	3508.88	125.317	0.350689	14	1811.48	129.391	0.362091
		Mean			357.345
	Exp #2	Field #1	43	3811.71	88.6444	0.479459	17	16090.6	946.506	5.11945	50	845.15	16.903	0.0914247
		Field #2	53	11033.9	208.188	1.12604	23	3138.53	136.458	0.738071	50	1743.85	34.877	0.188642
		Field #3	28	16753.5	598.34	3.23629	19	10511.5	553.238	2.99235	45	2504.35	55.6522	0.301011
		Field #4	23	2624.53	114.11	0.617196	25	7079.37	283.175	1.53163	47	474.88	10.1038	0.0546494
		Field #5	36	5008.93	139.137	0.752562	24	6045.17	251.882	1.36238	53	9790.3	184.723	0.999125
		Field #6	38	1283.96	33.7884	0.182754	22	39033.1	1774.23	9.59643	49	3876.3	79.1082	0.427879
		Field #7	36	5962.36	165.621	0.895809	19	7503.21	394.906	2.13596	50	5956.04	119.121	0.644299
		Field #8	30	1417.21	47.2403	0.255513	17	3575.79	210.341	1.13769	63	2926.39	46.4506	0.251242
		Field #9	41	9189.5	224.134	1.21229	24	11641.1	485.047	2.62352	43	3580.62	83.2702	0.450391
		Field #10	41	9415.27	229.641	1.24208	24	5453	227.208	1.22892	66	1171.98	17.7573	0.0960453
		Mean			184.884
	Exp #3	Field #1	13	38773.5	2982.57	4.34454	26	399.93	15.3819	0.0224059	43	5031.41	117.01	0.170441
		Field #2	31	12891.2	415.846	0.605738	22	5874.41	267.019	0.38895	33	902.75	27.3561	0.0398479
		Field #3	27	3721.13	137.82	0.200754	18	4761.36	264.52	0.38531	35	4931.52	140.901	0.205241
		Field #4	19	12253	644.893	0.939377	17	1353.77	79.6335	0.115997	58	2066.41	35.6278	0.0518968
		Field #5	18	3360.01	186.667	0.271907	19	2498.59	131.505	0.191555	34	3870	113.824	0.1658
		Field #6	19	7083.86	372.835	0.543086	18	3030.39	168.355	0.245233	67	6502.42	97.051	0.141368
		Field #7	19	12227.3	643.541	0.937407	21	563.18	26.8181	0.0390643	48	4904.62	102.18	0.148839
		Field #8	35	16617.5	474.785	0.691591	27	4476.73	165.805	0.241518	41	3519	85.8293	0.125022
		Field #9	36	15924.8	442.356	0.644354	48	4195.4	87.4042	0.127316	55	14117.4	256.681	0.373891
		Field #10	20	11276	563.799	0.821252	51	4695.17	92.0622	0.134101	58	1084.73	18.7022	0.0272424
		Mean			686.512
	Exp #4	Field #1	32	13095.2	409.224	1.04954	23	10009.7	435.203	1.11617	73	1595.68	21.8586	0.0560609
		Field #2	27	23392.8	866.399	2.22206	26	11419.1	439.195	1.1264	55	2449.34	44.5335	0.114215
		Field #3	27	2285.37	84.6433	0.217085	27	5508.97	204.036	0.523292	41	2454.67	59.87	0.153549
		Field #4	24	10207	425.293	1.09075	40	12941.7	323.544	0.829793	68	6792.06	99.8832	0.256171
		Field #5	27	14652.8	542.696	1.39185	28	7942.78	283.671	0.727531	78	7753	99.3974	0.254925
		Field #6	21	17373.7	827.317	2.12182	37	8047.44	217.498	0.557819	67	1126.94	16.82	0.0431383
		Field #7	42	7359.61	175.229	0.44941	32	12261.7	383.178	0.982737	57	19738.3	346.286	0.888121
		Field #8	89	26280.4	295.285	0.75732	32	16893.8	527.93	1.35398	33	444.38	13.4661	0.0345365
		Field #9	59	7954.17	134.816	0.345764	27	1576.48	58.3881	0.149748	48	1573.12	32.7733	0.0840539
		Field #10	49	6770.96	138.183	0.354398	28	40949.2	1462.47	3.75081	48	2042.2	42.5458	0.109117
		Mean			389.909
	Exp #5	Field #1	69	6067.51	87.9349	0.385649	37	4037.32	109.117	0.478545	41	1403.15	34.2232	0.15009
		Field #2	81	8464.78	104.503	0.458313	52	1137.49	21.8748	0.0959346	73	3215.69	44.0505	0.193189
		Field #3	101	15234.6	150.838	0.661518	55	13785	250.636	1.09919	43	1390.75	32.343	0.141844
		Field #4	90	18525.4	205.838	0.902729	44	28018.2	636.778	2.79267	66	8272.54	125.342	0.5497
		Field #5	94	21425.7	227.933	0.999626	68	8829.25	129.842	0.569437	49	3153.03	64.3476	0.282204
		Field #6	114	7314.1	64.1588	0.281376	44	1183.3	26.8932	0.117943	73	4371.82	59.8879	0.262646
		Field #7	97	43010.1	443.403	1.9446	56	9024.42	161.15	0.706744	104	1960.06	18.8467	0.0826546
		Field #8	98	33373.8	340.549	1.49352	61	11287.7	185.044	0.811532	57	2417.36	42.4098	0.185993
		Field #9	107	23614.6	220.697	0.967893	37	2667.81	72.103	0.316216	65	1885.11	29.0017	0.12719
		Field #10	97	42129.4	434.324	1.90478	53	2077.95	39.2066	0.171945	70	655.28	9.36114	0.0410544
		Mean			228.018
ANOVA summary
F	10.1
P value	< 0,0001
P value summary	****
Are differences among means statistically significant? (P < 0.05)	Yes
R square	0.1208
Brown-Forsythe test
F (DFn, DFd)	6,184 (2, 147)
P value	0.0026
P value summary	**
Significantly different standard deviations? (P < 0.05)	Yes
Bartlett's test
Bartlett's statistic (corrected)	125.8
P value	< 0,0001
P value summary	****
Significantly different standard deviations? (P < 0.05)	Yes
ANOVA table	SS	DF	MS	F (DFn, DFd)	P value
Treatment (between columns)	21.96	2	10.98	F (2, 147) = 10,10	P < 0,0001
Residual (within columns)	159.8	147	1.087
Total	181.8	149
Bonferroni's multiple comparisons test	Mean Diff,	95% CI of diff,	Significant?	Summary	Adjusted P Value
WT vs. S113A	-0.1164	-0,5886 to 0,3558	No	ns	> 0,9999
WT vs. S113D	0.7472	0,2750 to 1,219	Yes	***	0.0009
Test details	Mean 1	Mean 2	Mean Diff,	SE of diff,	n1	n2	t	DF
WT vs. S113A	0.9998	1.116	-0.1164	0.2085	50	50	0.5582	147
WT vs. S113D	0.9998	0.2526	0.7472	0.2085	50	50	3.583	147

## Sheet: Fig 8G
Figure 8G: Quantification of cells with invadopodia after infection with triple phospho-mutants of Cortactin (p27+/+)
			Cortactin WT			Cortactin TA			Cortactin TD
			# cells	# Cells with invadopodia	% of invadopodia forming cells	# cells	# Cells with invadopodia	% of invadopodia forming cells	# cells	# Cells with invadopodia	% of invadopodia forming cells
	Exp #1	Field #1	18	2	11.1111	17	7	41.1765	54	5	9.25926
		Field #2	15	3	20	20	5	25	34	5	14.7059
		Field #3	13	1	7.69231	21	10	47.619	43	4	9.30233
		Field #4	25	3	12	30	9	30	51	4	7.84314
		Field #5	31	5	16.129	60	14	23.3333	44	7	15.9091
		Field #6	29	6	20.6897	78	18	23.0769	33	3	9.09091
		Field #7	42	5	11.9048	70	16	22.8571	41	4	9.7561
		Field #8	40	5	12.5	68	15	22.0588	40	6	15
		Field #9	35	5	14.2857	50	12	24	55	8	14.5455
		Field #10	24	2	8.33333	83	8	9.63855	73	4	5.47945
	Exp #2	Field #1	38	3	7.89474	39	4	10.2564	95	4	4.21053
		Field #2	49	3	6.12245	56	10	17.8571	92	8	8.69565
		Field #3	49	6	12.2449	139	18	12.9496	108	10	9.25926
		Field #4	52	3	5.76923	49	10	20.4082	131	9	6.87023
		Field #5	55	4	7.27273	21	5	23.8095	126	8	6.34921
		Field #6	51	4	7.84314	42	9	21.4286	96	3	3.125
		Field #7	46	5	10.8696	55	9	16.3636	99	5	5.05051
		Field #8	44	4	9.09091	53	9	16.9811	127	8	6.29921
		Field #9	51	3	5.88235	95	21	22.1053	77	6	7.79221
		Field #10	41	2	4.87805	52	10	19.2308	103	6	5.82524
	Exp #3	Field #1	74	11	14.8649	120	33	27.5	53	5	9.43396
		Field #2	56	3	5.35714	118	20	16.9492	49	4	8.16327
		Field #3	43	4	9.30233	87	20	22.9885	92	14	15.2174
		Field #4	81	8	9.87654	74	20	27.027	90	16	17.7778
		Field #5	82	6	7.31707	58	15	25.8621	87	12	13.7931
		Field #6	108	11	10.1852	58	21	36.2069	68	6	8.82353
		Field #7	118	10	8.47458	53	19	35.8491	62	5	8.06452
		Field #8	113	10	8.84956	68	14	20.5882	41	2	4.87805
		Field #9	95	11	11.5789	82	11	13.4146	94	5	5.31915
		Field #10	114	14	12.2807	129	28	21.7054	80	9	11.25
ANOVA summary
F	53.38
P value	< 0,0001
P value summary	****
Are differences among means statistically significant? (P < 0.05)	Yes
R square	0.551
Brown-Forsythe test
F (DFn, DFd)	4,719 (2, 87)
P value	0.0113
P value summary	*
Significantly different standard deviations? (P < 0.05)	Yes
Bartlett's test
Bartlett's statistic (corrected)	24.44
P value	< 0,0001
P value summary	****
Significantly different standard deviations? (P < 0.05)	Yes
ANOVA table	SS
Treatment (between columns)	3650
Residual (within columns)	2975
Total	6625
Bonferroni's multiple comparisons test	Mean Diff,	95% CI of diff,	Significant?	Summary	Adjusted P Value
WT vs. TA	-12.92	-16,36 to -9,473	Yes	****	< 0,0001
WT vs. TD	1.117	-2,327 to 4,560	No	ns	0.923
Test details	Mean 1	Mean 2	Mean Diff,	SE of diff,	n1	n2	t	DF
WT vs. TA	10.36	23.27	-12.92	1.51	30	30	8.556	87
WT vs. TD	10.36	9.24	1.117	1.51	30	30	0.7396	87

## Sheet: Fig 8H
Figure 8H : Quantification of cells with invadopodia after infection with triple phospho-mutants of Cortactin (p27-/-)
			Cortactin WT			Cortactin TA			Cortactin TD
			# cells	# Cells with invadopodia	% of invadopodia forming cells	# cells	# Cells with invadopodia	% of invadopodia forming cells	# cells	# Cells with invadopodia	% of invadopodia forming cells
	Exp #1	Field #1	67	21	31.3433	20	8	40	31	7	22.5806
		Field #2	43	14	32.5581	12	4	33.3333	18	4	22.2222
		Field #3	42	16	38.0952	29	11	37.931	12	3	25
		Field #4	24	11	45.8333	35	17	48.5714	21	3	14.2857
		Field #5	60	22	36.6667	23	17	73.913	21	4	19.0476
		Field #6	78	27	34.6154	23	6	26.087	25	5	20
		Field #7	76	18	23.6842	17	7	41.1765	34	7	20.5882
		Field #8	36	12	33.3333	22	6	27.2727	31	5	16.129
		Field #9	42	19	45.2381	28	13	46.4286	24	4	16.6667
		Field #10	40	13	32.5	13	5	38.4615	31	10	32.2581
	Exp #2	Field #1	70	24	34.2857	18	3	16.6667	59	8	13.5593
		Field #2	55	20	36.3636	13	5	38.4615	60	10	16.6667
		Field #3	69	20	28.9855	16	5	31.25	47	6	12.766
		Field #4	75	23	30.6667	15	4	26.6667	34	5	14.7059
		Field #5	62	21	33.871	11	4	36.3636	31	3	9.67742
		Field #6	66	21	31.8182	11	4	36.3636	20	3	15
		Field #7	51	12	23.5294	14	3	21.4286	27	1	3.7037
		Field #8	66	16	24.2424	14	4	28.5714	26	2	7.69231
		Field #9	84	36	42.8571	16	3	18.75	30	2	6.66667
		Field #10	58	21	36.2069	19	9	47.3684	31	4	12.9032
	Exp #3	Field #1	66	26	39.3939	34	10	29.4118	64	10	15.625
		Field #2	77	25	32.4675	37	13	35.1351	69	14	20.2899
		Field #3	48	19	39.5833	27	12	44.4444	70	10	14.2857
		Field #4	49	21	42.8571	23	12	52.1739	91	14	15.3846
		Field #5	62	25	40.3226	25	12	48	111	20	18.018
		Field #6	73	33	45.2055	27	9	33.3333	54	6	11.1111
		Field #7	92	40	43.4783	21	10	47.619	63	13	20.6349
		Field #8	59	25	42.3729	22	9	40.9091	59	12	20.339
		Field #9	39	19	48.7179	21	11	52.381	60	9	15
		Field #10	55	19	34.5455	21	8	38.0952	65	14	21.5385
ANOVA summary
F	59.41
P value	< 0,0001
P value summary	****
Are differences among means statistically significant? (P < 0.05)	Yes
R square	0.5773
Brown-Forsythe test
F (DFn, DFd)	5,149 (2, 87)
P value	0.0077
P value summary	**
Significantly different standard deviations? (P < 0.05)	Yes
Bartlett's test
Bartlett's statistic (corrected)	16.93
P value	0.0002
P value summary	***
Significantly different standard deviations? (P < 0.05)	Yes
ANOVA table	SS
Treatment (between columns)	8499
Residual (within columns)	6223
Total	14723
Bonferroni's multiple comparisons test	Mean Diff,	95% CI of diff,	Significant?	Summary	Adjusted P Value
WT vs. TA	-1.703	-6,684 to 3,278	No	ns	0.875
WT vs. TD	19.71	14,73 to 24,69	Yes	****	< 0,0001
Test details	Mean 1	Mean 2	Mean Diff,	SE of diff,	n1	n2	t	DF
WT vs. TA	36.19	37.89	-1.703	2.184	30	30	0.78	87
WT vs. TD	36.19	16.48	19.71	2.184	30	30	9.026	87

## Sheet: Fig 8I
Figure 8I : Quantification of degraded area after infection with triple phospho-mutants of Cortactin (p27+/+)
			Cortactin WT				Cortactin TA				Cortactin TD
			# cells	Sum degraded area (μm²)	Degraded per cells (μm²)	Fold change relative to Cortactin WT	# cells	Sum degraded area (μm²)	Degraded per cells (μm²)	Fold change relative to Cortactin WT	# cells	Sum degraded area (μm²)	Degraded per cells (μm²)	Fold change relative to Cortactin WT
	Exp #1	Field #1	18	117.03	6.50167	0.751471	17	1136.04	66.8259	7.72382	54	51.88	0.960741	0.111044
		Field #2	15	7.03	0.468667	0.0541691	20	100.03	5.0015	0.57808	34	0	0	0
		Field #3	13	170.63	13.1254	1.51705	21	91.73	4.3681	0.50487	43	67.83	1.57744	0.182323
		Field #4	25	124.01	4.9604	0.57333	30	3703.83	123.461	14.2698	51	96.64	1.8949	0.219015
		Field #5	31	216.38	6.98	0.806758	60	2280.49	38.0082	4.39303	44	317.91	7.22523	0.835101
		Field #6	29	122.2	4.21379	0.487036	78	479.67	6.14962	0.710781	33	0	0	0
		Field #7	42	221.48	5.27333	0.609499	70	5811.28	83.0183	9.59536	41	0	0	0
		Field #8	40	226.63	5.66575	0.654855	68	4591.38	67.5203	7.80408	40	197.91	4.94775	0.571867
		Field #9	35	622.7	17.7914	2.05636	50	1141.45	22.829	2.63861	55	71.92	1.30764	0.151138
		Field #10	24	516.93	21.5388	2.48948	83	895.21	10.7857	1.24662	73	28.1	0.384932	0.0444909
		Mean			8.65192
	Exp #2	Field #1	38	24.51	0.645	0.408499	39	1433.97	36.7685	23.2866	95	105.95	1.11526	0.706331
		Field #2	49	11.3	0.230612	0.146054	56	192.97	3.44589	2.18239	92	206.39	2.24337	1.4208
		Field #3	49	93.32	1.90449	1.20617	139	849.62	6.11237	3.87116	108	1330.26	12.3172	7.80088
		Field #4	52	48.9	0.940385	0.595575	49	6246.81	127.486	80.7408	131	962.51	7.3474	4.65334
		Field #5	55	54.47	0.990364	0.627228	21	1066.51	50.7862	32.1645	126	186.38	1.47921	0.936827
		Field #6	51	199.57	3.91314	2.47831	42	685.03	16.3102	10.3298	96	179	1.86458	1.1809
		Field #7	46	48.29	1.04978	0.66486	55	433.84	7.888	4.99572	99	330.25	3.33586	2.1127
		Field #8	44	229.15	5.20795	3.29836	53	535.29	10.0998	6.39652	127	522.89	4.11724	2.60758
		Field #9	51	0	0	0	95	623.16	6.55958	4.15439	77	253.21	3.28844	2.08267
		Field #10	41	37.22	0.907805	0.574941	52	728	14	8.86664	103	671.26	6.51709	4.12747
		Mean			1.57895
	Exp #3	Field #1	74	183.33	2.47743	1.06783	120	1142.29	9.51908	4.10293	53	108.62	2.04943	0.883349
		Field #2	56	145.7	2.60179	1.12142	118	1177.97	9.9828	4.3028	49	84.99	1.73449	0.747602
		Field #3	43	93.02	2.16326	0.932409	87	1416.73	16.2843	7.01886	92	99.18	1.07804	0.464659
		Field #4	81	193.89	2.3937	1.03174	74	2801.56	37.8589	16.318	90	0	0	0
		Field #5	82	333.01	4.0611	1.75042	58	826.17	14.2443	6.1396	87	53.52	0.615172	0.265152
		Field #6	108	312.16	2.89037	1.24581	58	1014.64	17.4938	7.54019	68	171.48	2.52176	1.08693
		Field #7	118	149.55	1.26737	0.546264	53	625.86	11.8087	5.08979	62	24.52	0.395484	0.170462
		Field #8	113	181.73	1.60823	0.693181	68	1140.51	16.7722	7.22917	41	87.35	2.13049	0.918285
		Field #9	95	134.11	1.41168	0.608466	82	1047.75	12.7774	5.50735	94	0	0	0
		Field #10	114	265.14	2.32579	1.00246	129	3243.16	25.1408	10.8362	80	96.3	1.20375	0.518842
		Mean			2.32007
ANOVA summary
F	10.55
P value	< 0,0001
P value summary	****
Are differences among means statistically significant? (P < 0.05)	Yes
R square	0.1951
Brown-Forsythe test
F (DFn, DFd)	5,394 (2, 87)
P value	0.0062
P value summary	**
Significantly different standard deviations? (P < 0.05)	Yes
Bartlett's test
Bartlett's statistic (corrected)	201.6
P value	< 0,0001
P value summary	****
Significantly different standard deviations? (P < 0.05)	Yes
ANOVA table	SS
Treatment (between columns)	1598
Residual (within columns)	6591
Total	8189
Bonferroni's multiple comparisons test	Mean Diff,	95% CI of diff,	Significant?	Summary	Adjusted P Value
WT vs. TA	-9.018	-14,14 to -3,892	Yes	***	0.0003
WT vs. TD	-0.1597	-5,286 to 4,966	No	ns	> 0,9999
Test details	Mean 1	Mean 2	Mean Diff,	SE of diff,	n1	n2	t	DF
WT vs. TA	1	10.02	-9.018	2.247	30	30	4.013	87
WT vs. TD	1	1.16	-0.1597	2.247	30	30	0.07105	87

## Sheet: Fig 8J
Figure 8J : Quantification of degraded area after infection with triple phospho-mutants of Cortactin (p27-/-)
			Cortactin WT				Cortactin TA				Cortactin TD
			# cells	Sum degraded area (μm²)	Degraded per cells (μm²)	Fold change relative to Cortactin WT	# cells	Sum degraded area (μm²)	Degraded per cells (μm²)	Fold change relative to Cortactin WT	# cells	Sum degraded area (μm²)	Degraded per cells (μm²)	Fold change relative to Cortactin WT
	Exp #1	Field #1	67	26505.4	395.603	2.25046	20	2330.42	116.521	0.662853	31	353.7	11.4097	0.0649062
		Field #2	43	4749.44	110.452	0.628328	12	1789.73	149.144	0.848436	18	5563.73	309.096	1.75835
		Field #3	42	4533.68	107.945	0.614065	29	769.32	26.5283	0.150911	12	623.38	51.9483	0.295518
		Field #4	24	4803.75	200.156	1.13863	35	2569.43	73.4123	0.41762	21	122.21	5.81952	0.0331055
		Field #5	60	3905.56	65.0927	0.370292	23	3674.6	159.765	0.908856	21	7613.25	362.536	2.06236
		Field #6	78	10899.3	139.734	0.794905	23	505.72	21.9878	0.125082	25	956.63	38.2652	0.217679
		Field #7	76	14456.5	190.218	1.08209	17	2483.63	146.096	0.831095	34	1396.44	41.0718	0.233645
		Field #8	36	9400.06	261.113	1.48539	22	652.63	29.665	0.168755	31	6064.07	195.615	1.1128
		Field #9	42	9912.21	236.005	1.34256	28	2326.67	83.0954	0.472704	24	2110.66	87.9442	0.500288
		Field #10	40	2062.17	51.5543	0.293276	13	1642.84	126.372	0.718894	31	3808.85	122.866	0.698948
		Mean			175.787
	Exp #2	Field #1	70	18884.5	269.779	1.50379	18	3528.41	196.023	1.09266	59	3700.6	62.722	0.349623
		Field #2	55	7538.82	137.069	0.764048	13	3535.83	271.987	1.5161	60	2232.25	37.2042	0.207382
		Field #3	69	11496.7	166.618	0.928758	16	2352.3	147.019	0.819507	47	2784.75	59.25	0.330269
		Field #4	75	22310.5	297.473	1.65816	15	634	42.2667	0.235601	34	126.06	3.70765	0.020667
		Field #5	62	6971.17	112.438	0.626749	11	1232.36	112.033	0.624489	31	232.81	7.51	0.041862
		Field #6	66	6054.43	91.7338	0.511339	11	3549.04	322.64	1.79845	20	654.59	32.7295	0.18244
		Field #7	51	11845	232.255	1.29463	14	371.99	26.5707	0.14811	27	4023.42	149.016	0.830637
		Field #8	66	7165.63	108.57	0.605188	14	403.55	28.825	0.160675	26	2468.81	94.9542	0.52929
		Field #9	84	22958	273.309	1.52347	16	197.87	12.3669	0.068935	30	1079.2	35.9733	0.200521
		Field #10	58	6075.22	104.745	0.583867	19	79.62	4.19053	0.0233587	31	2311.67	74.57	0.415665
		Mean			179.399
	Exp #3	Field #1	66	24599.4	372.719	1.43133	34	26253.1	772.15	2.96525	64	4145.96	64.7806	0.248774
		Field #2	77	18478	239.974	0.92156	37	20273	547.92	2.10415	69	3904.38	56.5852	0.217302
		Field #3	48	19435.9	404.914	1.55497	27	13545.5	501.685	1.9266	70	4224.15	60.345	0.23174
		Field #4	49	12073	246.387	0.94619	23	13830.5	601.324	2.30924	91	5575.27	61.2667	0.23528
		Field #5	62	10826.2	174.616	0.670569	25	15799	631.961	2.42689	111	8678.87	78.188	0.300262
		Field #6	73	6824.31	93.4837	0.359001	27	4181.89	154.885	0.594797	54	6587.63	121.993	0.468484
		Field #7	92	16081.4	174.798	0.67127	21	17925.4	853.592	3.27801	63	4742.17	75.2725	0.289066
		Field #8	59	14601.7	247.486	0.950408	22	10161.3	461.877	1.77372	59	1944.56	32.9586	0.12657
		Field #9	39	11206	287.334	1.10343	21	20084.2	956.39	3.67278	60	3993.67	66.5612	0.255612
		Field #10	55	19925.6	362.284	1.39126	21	19231.5	915.783	3.51684	65	5484.92	84.3834	0.324053
		Mean			260.4
ANOVA summary
F	8.909
P value	0.0003
P value summary	***
Are differences among means statistically significant? (P < 0.05)	Yes
R square	0.17
Brown-Forsythe test
F (DFn, DFd)	10,10 (2, 87)
P value	0.0001
P value summary	***
Significantly different standard deviations? (P < 0.05)	Yes
Bartlett's test
Bartlett's statistic (corrected)	30.84
P value	< 0,0001
P value summary	****
Significantly different standard deviations? (P < 0.05)	Yes
ANOVA table	SS
Treatment (between columns)	9.913
Residual (within columns)	48.4
Total	58.31
Bonferroni's multiple comparisons test	Mean Diff,	95% CI of diff,	Significant?	Summary	Adjusted P Value
WT vs. TA	-0.2133	-0,6526 to 0,2259	No	ns	0.542
WT vs. TD	0.5727	0,1334 to 1,012	Yes	**	0.0076
Test details	Mean 1	Mean 2	Mean Diff,	SE of diff,	n1	n2	t	DF
WT vs. TA	0.999	1.212	-0.2133	0.1926	30	30	1.108	87
WT vs. TD	0.999	0.4263	0.5727	0.1926	30	30	2.974	87

## Sheet: Fig 8-suppl 1B
Fig 8 Suppl 1B: quantification of P-Ser Cortactin/Cortactin ratio								Image J measures (arbitrary units)
								Cortactin	Cortactin +FRAX597
	normalized to Cortactin signal						P-Ser	76	51
	Cortactin	Cortactin +FRAX597					Cortactin	127	130
P-Ser/Cortactin	1	0.65					ratio P-Ser/Cortactin	0.6	0.39		0.6	0.39
	1	0.57									0.67	0.38
	1	0.76					P-Ser	26.7	15.8		0.43	0.33
	Cortactin	Cortactin +FRAX597					Cortactin	39.8	41.6
Mean P-Ser/Cortactin	1	0.66					ratio P-Ser/Cortactin	0.67	0.38
sem	0	0.0550757
							P-Ser	12	13.8
							Cortactin	28	42.1
							ratio P-Ser/Cortactin	0.43	0.33
Table Analyzed	Fig 8 Normalized to Cortactin
Column B	Cortactin +FRAX597
vs.	vs,
Column A	Cortactin
Unpaired t test
P value	0.0035
P value summary	**
Significantly different? (P < 0.05)	Yes
One- or two-tailed P value?	Two-tailed
t, df	t=6,173 df=4
How big is the difference?
Mean ± SEM of column A	1,000 ± 0,0 N=3
Mean ± SEM of column B	0,6600 ± 0,05508 N=3
Difference between means	-0,3400 ± 0,05508
95% confidence interval	-0,4929 to -0,1871
R square	0.905
F test to compare variances
F,DFn, Dfd
P value
P value summary
Significantly different? (P < 0.05)
