# Supplementary material for: p27Kip1 promotes invadopodia turnover and invasion through the regulation of the PAK1/Cortactin pathway
Source: eLife. 2017 Mar 13;6:e22207. doi: 10.7554/eLife.22207 (PMC5388532; doi:10.7554/eLife.22207)
Supplement: Figure 8—source data 4. — DOI: http://dx.doi.org/10.7554/eLife.22207.036 [file elife-22207-fig8-data4.xlsx]

## Sheet: Feuil1
MASCOT Search Results
Protein View: SRC8_HUMAN
Src substrate cortactin OS=Homo sapiens GN=CTTN PE=1 SV=2
Database:	SwissProt
Score:	20687
Nominal mass (Mr):	61720
Calculated pI:	5.24
Taxonomy:
Search parameters
MS data file:	File Name: StMA170118_3_F18282.raw
Enzyme:	Trypsin/P: cuts C-term side of KR.
Fixed modifications:	_Carbamidomethyl (C)
Variable modifications:	_Oxidation (M), Phospho (ST), Phospho (Y)
Protein sequence coverage: 83%
							The peptide match table below contains the following columns:
Matched peptides shown in bold red.
							1. Query number, hyperlinked to Peptide View.
1	MWKASAGHAV	SIAQDDAGAD	DWETDPDFVN	DVSEKEQRWG	AKTVQGSGHQ		2. Dupes is a count of the number of additional matches to the same peptide sequence with the same modifications and charge. Click on the triangle link to expand these duplicate matches, which will have the same or lower score than the one first listed
51	EHINIHKLRE	NVFQEHQTLK	EKELETGPKA	SHGYGGKFGV	EQDRMDKSAV		3. Experimental m/z value
101	GHEYQSKLSK	HCSQVDSVRG	FGGKFGVQMD	RVDQSAVGFE	YQGKTEKHAS		4. Experimental m/z transformed to a relative molecular mass
151	QKDYSSGFGG	KYGVQADRVD	KSAVGFDYQG	KTEKHESQRD	YSKGFGGKYG		5. Relative molecular mass calculated from the matched peptide sequence
201	IDKDKVDKSA	VGFEYQGKTE	KHESQKDYVK	GFGGKFGVQT	DRQDKCALGW		6. Difference (error) between the experimental and calculated masses
251	DHQEKLQLHE	SQKDYKTGFG	GKFGVQSERQ	DSAAVGFDYK	EKLAKHESQQ		7. Number of missed cleavage sites
301	DYSKGFGGKY	GVQKDRMDKN	ASTFEDVTQV	SSAYQKTVPV	EAVTSKTSNI		8. Ions score – If there are duplicate matches to the same peptide, then the lower scoring matches are shown in brackets.
351	RANFENLAKE	KEQEDRRKAE	AERAQRMAKE	RQEQEEARRK	LEEQARAKTQ		9. Expectation value for the peptide match. (The number of times we would expect to obtain an equal or higher score, purely by chance. The lower this value, the more significant the result).
401	TPPVSPAPQP	TEERLPSSPV	YEDAASFKAE	LSYRGPVSGT	EPEPVYSMEA		10. Rank of the peptide match, (1 to 10, where 1 is the best match). If there is a triangle to the left of the rank, the row can be expanded to show the alternative matches for this query.
451	ADYREASSQQ	GLAYATEAVY	ESAEAPGHYP	AEDSTYDEYE	NDLGITAVAL		11. A letter U if the peptide sequence is unique to one protein family member.
501	YDYQAAGDDE	ISFDPDDIIT	NIEMIDDGWW	RGVCKGRYGL	FPANYVELRQ		12. A column is displayed for each family member selected by its checkbox immediately above the table. A marker is shown if the peptide match is present in the protein. Where a column represents more than one protein, and the peptide is found in some of these proteins, but not all, the marker is grey. Otherwise, it is black.
							13. Sequence of the peptide in 1-letter code. The residues that bracket the peptide sequence in the protein are also shown, delimited by periods. If the peptide forms the protein terminus, then a dash is shown instead.
Unformatted sequence string: 550 residues (for pasting into other applications).							14. Any variable modifications used to obtain the match
1		localisaton in the sequence		3	4	5	6	7	8	9	10	11	13				14
Mascot	Residue		Residue	M/z	Deduced	Theoretical	Difference	Missed	Peptide	Random							Modifications
Query	Start	–	End	Observed	Mr(expt)	Mr(calc)	in ppm	cleavage	Score	Expectation	Rank	Unique	Matching Peptide sequence
21241	1	–	35	949.171	3792.65	3792.65	1.43	1	68	1.4e-06	1	U	-.MWKASAGHAVSIAQDDAGADDWETDPDFVNDVSEK.E + _Oxidation (M)
19759	4	–	35	1111.48	3331.43	3331.44	-3.61	0	74	3.3e-07	1	U	K.ASAGHAVSIAQDDAGADDWETDPDFVNDVSEK.E
19760	4	–	35	833.864	3331.43	3331.44	-3.08	0	73	1.5e-06	1	U	K.ASAGHAVSIAQDDAGADDWETDPDFVNDVSEK.E
19761	4	–	35	1111.48	3331.43	3331.44	-2.18	0	88	9.3e-09	1	U	K.ASAGHAVSIAQDDAGADDWETDPDFVNDVSEK.E
19762	4	–	35	1111.49	3331.43	3331.44	-1.52	0	40	0.00042	1	U	K.ASAGHAVSIAQDDAGADDWETDPDFVNDVSEK.E
19763	4	–	35	1111.49	3331.44	3331.44	-1.08	0	80	3.2e-07	1	U	K.ASAGHAVSIAQDDAGADDWETDPDFVNDVSEK.E
19764	4	–	35	833.866	3331.44	3331.44	-0.88	0	100	1.2e-09	1	U	K.ASAGHAVSIAQDDAGADDWETDPDFVNDVSEK.E
19765	4	–	35	1111.49	3331.44	3331.44	-0.86	0	69	6.5e-07	1	U	K.ASAGHAVSIAQDDAGADDWETDPDFVNDVSEK.E
19766	4	–	35	1111.49	3331.44	3331.44	-0.86	0	125	7.9e-12	1	U	K.ASAGHAVSIAQDDAGADDWETDPDFVNDVSEK.E
19767	4	–	35	1111.49	3331.44	3331.44	-0.53	0	42	0.00021	1	U	K.ASAGHAVSIAQDDAGADDWETDPDFVNDVSEK.E
19768	4	–	35	1111.49	3331.44	3331.44	-0.53	0	110	2.8e-10	1	U	K.ASAGHAVSIAQDDAGADDWETDPDFVNDVSEK.E
19769	4	–	35	1111.49	3331.44	3331.44	-0.53	0	64	3.3e-06	1	U	K.ASAGHAVSIAQDDAGADDWETDPDFVNDVSEK.E
19770	4	–	35	1111.49	3331.44	3331.44	-0.53	0	83	3.1e-08	1	U	K.ASAGHAVSIAQDDAGADDWETDPDFVNDVSEK.E
19771	4	–	35	1111.49	3331.44	3331.44	-0.31	0	64	2.8e-06	1	U	K.ASAGHAVSIAQDDAGADDWETDPDFVNDVSEK.E
19772	4	–	35	833.867	3331.44	3331.44	-0.22	0	95	1.1e-08	1	U	K.ASAGHAVSIAQDDAGADDWETDPDFVNDVSEK.E
19773	4	–	35	1111.49	3331.44	3331.44	-0.2	0	105	5.9e-10	1	U	K.ASAGHAVSIAQDDAGADDWETDPDFVNDVSEK.E
19774	4	–	35	1111.49	3331.44	3331.44	-0.086	0	72	5.4e-07	1	U	K.ASAGHAVSIAQDDAGADDWETDPDFVNDVSEK.E
19775	4	–	35	1111.49	3331.44	3331.44	0.13	0	63	2.6e-06	1	U	K.ASAGHAVSIAQDDAGADDWETDPDFVNDVSEK.E
19776	4	–	35	1111.49	3331.44	3331.44	0.24	0	98	2.2e-09	1	U	K.ASAGHAVSIAQDDAGADDWETDPDFVNDVSEK.E
19777	4	–	35	1111.49	3331.44	3331.44	0.35	0	121	2.1e-11	1	U	K.ASAGHAVSIAQDDAGADDWETDPDFVNDVSEK.E
19778	4	–	35	1111.49	3331.44	3331.44	0.46	0	84	6.1e-08	1	U	K.ASAGHAVSIAQDDAGADDWETDPDFVNDVSEK.E
19779	4	–	35	1111.49	3331.44	3331.44	0.57	0	129	2.7e-12	1	U	K.ASAGHAVSIAQDDAGADDWETDPDFVNDVSEK.E
19780	4	–	35	667.295	3331.44	3331.44	0.62	0	89	1.2e-08	1	U	K.ASAGHAVSIAQDDAGADDWETDPDFVNDVSEK.E
19781	4	–	35	1111.49	3331.44	3331.44	0.68	0	94	2.7e-09	1	U	K.ASAGHAVSIAQDDAGADDWETDPDFVNDVSEK.E
19782	4	–	35	1111.49	3331.44	3331.44	0.68	0	122	1.8e-11	1	U	K.ASAGHAVSIAQDDAGADDWETDPDFVNDVSEK.E
19783	4	–	35	1111.49	3331.44	3331.44	0.79	0	100	1.3e-09	1	U	K.ASAGHAVSIAQDDAGADDWETDPDFVNDVSEK.E
19784	4	–	35	1111.49	3331.44	3331.44	1.01	0	98	1.8e-09	1	U	K.ASAGHAVSIAQDDAGADDWETDPDFVNDVSEK.E
19785	4	–	35	1111.49	3331.44	3331.44	1.12	0	70	4.2e-07	1	U	K.ASAGHAVSIAQDDAGADDWETDPDFVNDVSEK.E
19786	4	–	35	833.868	3331.44	3331.44	1.24	0	80	1.1e-07	1	U	K.ASAGHAVSIAQDDAGADDWETDPDFVNDVSEK.E
19787	4	–	35	1111.49	3331.44	3331.44	1.34	0	85	2.5e-08	1	U	K.ASAGHAVSIAQDDAGADDWETDPDFVNDVSEK.E
19788	4	–	35	1111.49	3331.44	3331.44	1.44	0	62	2.1e-05	1	U	K.ASAGHAVSIAQDDAGADDWETDPDFVNDVSEK.E
19789	4	–	35	1111.49	3331.44	3331.44	1.44	0	73	6.8e-07	1	U	K.ASAGHAVSIAQDDAGADDWETDPDFVNDVSEK.E
19790	4	–	35	1111.49	3331.44	3331.44	1.44	0	87	1.2e-08	1	U	K.ASAGHAVSIAQDDAGADDWETDPDFVNDVSEK.E
19791	4	–	35	1111.49	3331.44	3331.44	1.56	0	108	2.1e-10	1	U	K.ASAGHAVSIAQDDAGADDWETDPDFVNDVSEK.E
19792	4	–	35	1111.49	3331.44	3331.44	1.78	0	116	7.9e-11	1	U	K.ASAGHAVSIAQDDAGADDWETDPDFVNDVSEK.E
19793	4	–	35	667.297	3331.45	3331.44	2.18	0	92	6.2e-09	1	U	K.ASAGHAVSIAQDDAGADDWETDPDFVNDVSEK.E
19794	4	–	35	1111.49	3331.45	3331.44	2.88	0	118	4.9e-11	1	U	K.ASAGHAVSIAQDDAGADDWETDPDFVNDVSEK.E
19795	4	–	35	1111.49	3331.45	3331.44	3.53	0	54	8.5e-05	1	U	K.ASAGHAVSIAQDDAGADDWETDPDFVNDVSEK.E
20422	4	–	35	1138.14	3411.41	3411.41	-0.024	0	156	4.7e-15	1	U	K.ASAGHAVSIAQDDAGADDWETDPDFVNDVSEK.E + Phospho (ST)
20423	4	–	35	1138.14	3411.41	3411.41	0.091	0	111	2.4e-10	1	U	K.ASAGHAVSIAQDDAGADDWETDPDFVNDVSEK.E + Phospho (ST)
20424	4	–	35	1138.14	3411.41	3411.41	1.59	0	56	3.5e-05	1	U	K.ASAGHAVSIAQDDAGADDWETDPDFVNDVSEK.E + Phospho (ST)
20425	4	–	35	1138.14	3411.41	3411.41	2.12	0	112	1.3e-10	1	U	K.ASAGHAVSIAQDDAGADDWETDPDFVNDVSEK.E + Phospho (ST)
20426	4	–	35	1138.15	3411.41	3411.41	2.55	0	36	0.0018	1	U	K.ASAGHAVSIAQDDAGADDWETDPDFVNDVSEK.E + Phospho (ST)
21131	4	–	38	1249.22	3744.63	3744.64	-1.71	1	93	1.1e-08	1	U	K.ASAGHAVSIAQDDAGADDWETDPDFVNDVSEKEQR.W
21132	4	–	38	937.167	3744.64	3744.64	-1.15	1	94	7.1e-09	1	U	K.ASAGHAVSIAQDDAGADDWETDPDFVNDVSEKEQR.W
21133	4	–	38	937.167	3744.64	3744.64	-0.75	1	69	2e-06	1	U	K.ASAGHAVSIAQDDAGADDWETDPDFVNDVSEKEQR.W
21134	4	–	38	937.167	3744.64	3744.64	-0.69	1	112	1.5e-10	1	U	K.ASAGHAVSIAQDDAGADDWETDPDFVNDVSEKEQR.W
21135	4	–	38	1249.22	3744.64	3744.64	-0.34	1	120	2.5e-11	1	U	K.ASAGHAVSIAQDDAGADDWETDPDFVNDVSEKEQR.W
21136	4	–	38	1249.22	3744.64	3744.64	-0.15	1	134	8e-13	1	U	K.ASAGHAVSIAQDDAGADDWETDPDFVNDVSEKEQR.W
21137	4	–	38	937.168	3744.64	3744.64	-0.036	1	125	6.5e-12	1	U	K.ASAGHAVSIAQDDAGADDWETDPDFVNDVSEKEQR.W
21138	4	–	38	1249.22	3744.64	3744.64	0.35	1	137	5.3e-13	1	U	K.ASAGHAVSIAQDDAGADDWETDPDFVNDVSEKEQR.W
21139	4	–	38	937.168	3744.64	3744.64	0.55	1	47	0.00016	1	U	K.ASAGHAVSIAQDDAGADDWETDPDFVNDVSEKEQR.W
21140	4	–	38	937.168	3744.64	3744.64	0.62	1	88	6.2e-08	1	U	K.ASAGHAVSIAQDDAGADDWETDPDFVNDVSEKEQR.W
21141	4	–	38	937.169	3744.65	3744.64	1.6	1	106	4.2e-10	1	U	K.ASAGHAVSIAQDDAGADDWETDPDFVNDVSEKEQR.W
13459	43	–	57	562.288	1683.84	1683.84	-0.67	0	34	0.0028	1	U	K.TVQGSGHQEHINIHK.L
13486	43	–	57	562.289	1683.84	1683.84	-0.032	0	25	0.005	1	U	K.TVQGSGHQEHINIHK.L
13487	43	–	57	842.929	1683.84	1683.84	0.055	0	50	8.8e-05	1	U	K.TVQGSGHQEHINIHK.L
13488	43	–	57	842.929	1683.84	1683.84	0.055	0	28	0.0052	1	U	K.TVQGSGHQEHINIHK.L
13497	43	–	57	562.289	1683.84	1683.84	0.31	0	26	0.009	1	U	K.TVQGSGHQEHINIHK.L
13510	43	–	57	842.93	1683.85	1683.84	0.57	0	35	0.00048	1	U	K.TVQGSGHQEHINIHK.L
13517	43	–	57	842.93	1683.85	1683.84	1	0	52	2e-05	1	U	K.TVQGSGHQEHINIHK.L
13520	43	–	57	562.289	1683.85	1683.84	1.07	0	36	0.00062	1	U	K.TVQGSGHQEHINIHK.L
12919	58	–	70	547.962	1640.86	1640.86	-0.48	1	32	0.0035	1	U	K.LRENVFQEHQTLK.E
12921	58	–	70	547.962	1640.86	1640.86	-0.48	1	25	0.0065	1	U	K.LRENVFQEHQTLK.E
12924	58	–	70	547.962	1640.86	1640.86	-0.26	1	25	0.026	1	U	K.LRENVFQEHQTLK.E
12928	58	–	70	411.223	1640.86	1640.86	-0.06	1	27	0.0031	1	U	K.LRENVFQEHQTLK.E
12932	58	–	70	547.962	1640.86	1640.86	0.066	1	32	0.0035	1	U	K.LRENVFQEHQTLK.E
12933	58	–	70	547.962	1640.86	1640.86	0.066	1	31	0.0067	1	U	K.LRENVFQEHQTLK.E
12936	58	–	70	547.962	1640.86	1640.86	0.18	1	37	0.0016	1	U	K.LRENVFQEHQTLK.E
12940	58	–	70	411.223	1640.86	1640.86	0.26	1	29	0.003	1	U	K.LRENVFQEHQTLK.E
12947	58	–	70	547.962	1640.86	1640.86	0.39	1	29	0.0054	1	U	K.LRENVFQEHQTLK.E
12948	58	–	70	547.962	1640.86	1640.86	0.39	1	31	0.0073	1	U	K.LRENVFQEHQTLK.E
12952	58	–	70	547.962	1640.86	1640.86	0.52	1	32	0.0069	1	U	K.LRENVFQEHQTLK.E
12955	58	–	70	821.44	1640.86	1640.86	0.7	1	32	0.0048	1	U	K.LRENVFQEHQTLK.E
12957	58	–	70	411.224	1640.86	1640.86	0.77	1	30	0.0022	1	U	K.LRENVFQEHQTLK.E
12970	58	–	70	821.44	1640.87	1640.86	1.53	1	29	0.0074	1	U	K.LRENVFQEHQTLK.E
12975	58	–	70	547.963	1640.87	1640.86	2.64	1	26	0.015	1	U	K.LRENVFQEHQTLK.E
9669	60	–	70	458.233	1371.68	1371.68	0.21	0	34	0.0042	1	U	R.ENVFQEHQTLK.E
9671	60	–	70	458.233	1371.68	1371.68	0.27	0	34	0.0014	1	U	R.ENVFQEHQTLK.E
9672	60	–	70	686.847	1371.68	1371.68	0.31	0	64	3.7e-06	1	U	R.ENVFQEHQTLK.E
9673	60	–	70	458.233	1371.68	1371.68	0.4	0	36	0.00097	1	U	R.ENVFQEHQTLK.E
9674	60	–	70	686.847	1371.68	1371.68	0.74	0	40	0.00089	1	U	R.ENVFQEHQTLK.E
9676	60	–	70	686.847	1371.68	1371.68	1.2	0	54	3e-05	1	U	R.ENVFQEHQTLK.E
12770	60	–	72	543.946	1628.81	1628.82	-0.7	1	37	0.0027	1	U	R.ENVFQEHQTLKEK.E
12771	60	–	72	408.211	1628.81	1628.82	-0.64	1	30	0.015	1	U	R.ENVFQEHQTLKEK.E
4333	71	–	79	515.774	1029.53	1029.53	-0.53	1	62	3.3e-06	1	U	K.EKELETGPK.A
4334	71	–	79	515.774	1029.53	1029.53	-0.06	1	65	1.7e-06	1	U	K.EKELETGPK.A
4336	71	–	79	344.185	1029.53	1029.53	0.22	1	37	0.0011	1	U	K.EKELETGPK.A
4340	71	–	79	515.775	1029.54	1029.53	1.24	1	43	0.00036	1	U	K.EKELETGPK.A
4341	71	–	79	515.775	1029.54	1029.53	1.49	1	36	0.0013	1	U	K.EKELETGPK.A
14403	71	–	87	596.636	1786.88	1786.88	-0.054	2	49	7.6e-05	1	U	K.EKELETGPKASHGYGGK.F
960	73	–	79	387.205	772.396	772.397	-1.22	0	33	0.0012	1	U	K.ELETGPK.A
961	73	–	79	387.205	772.396	772.397	-0.59	0	35	0.00078	1	U	K.ELETGPK.A
963	73	–	79	387.206	772.397	772.397	0.13	0	35	0.00075	1	U	K.ELETGPK.A
964	73	–	79	387.206	772.397	772.397	0.29	0	31	0.0018	1	U	K.ELETGPK.A
11796	73	–	87	510.923	1529.75	1529.75	-0.15	1	49	7.3e-05	1	U	K.ELETGPKASHGYGGK.F
11797	73	–	87	765.881	1529.75	1529.75	0.64	1	101	1e-09	1	U	K.ELETGPKASHGYGGK.F
990	80	–	87	388.688	775.361	775.361	-0.79	0	36	0.00027	1	U	K.ASHGYGGK.F
992	80	–	87	388.688	775.361	775.361	-0.064	0	33	0.00046	1	U	K.ASHGYGGK.F
993	80	–	87	388.689	775.363	775.361	2.13	0	39	0.00025	1	U	K.ASHGYGGK.F
12559	80	–	94	402.695	1606.75	1606.75	0.019	1	28	0.0076	1	U	K.ASHGYGGKFGVEQDR.M
12561	80	–	94	536.591	1606.75	1606.75	0.9	1	43	0.00016	1	U	K.ASHGYGGKFGVEQDR.M
12562	80	–	94	804.383	1606.75	1606.75	1.1	1	57	4.2e-06	1	U	K.ASHGYGGKFGVEQDR.M
1874	88	–	94	425.706	849.398	849.398	-0.12	0	29	0.0019	1	U	K.FGVEQDR.M
1875	88	–	94	425.706	849.398	849.398	-0.12	0	36	0.00032	1	U	K.FGVEQDR.M
1877	88	–	94	425.706	849.398	849.398	0.025	0	36	0.0014	1	U	K.FGVEQDR.M
1879	88	–	94	425.706	849.398	849.398	0.17	0	32	0.002	1	U	K.FGVEQDR.M
1880	88	–	94	425.706	849.398	849.398	0.17	0	32	0.0031	1	U	K.FGVEQDR.M
7680	88	–	97	612.788	1223.56	1223.56	0.73	1	44	0.0004	1	U	K.FGVEQDRMDK.S
7681	88	–	97	408.861	1223.56	1223.56	1.75	1	39	0.0011	1	U	K.FGVEQDRMDK.S
7926	88	–	97	414.192	1239.56	1239.56	-0.062	1	26	0.015	1	U	K.FGVEQDRMDK.S + _Oxidation (M)
7928	88	–	97	620.785	1239.56	1239.56	0.4	1	30	0.0036	1	U	K.FGVEQDRMDK.S + _Oxidation (M)
7930	88	–	97	620.785	1239.56	1239.56	0.89	1	34	0.0028	1	U	K.FGVEQDRMDK.S + _Oxidation (M)
7931	88	–	97	620.786	1239.56	1239.56	0.98	1	53	3.8e-05	1	U	K.FGVEQDRMDK.S + _Oxidation (M)
17530	88	–	107	582.524	2326.07	2326.06	0.35	2	32	0.00096	1	U	K.FGVEQDRMDKSAVGHEYQSK.L + _Oxidation (M)
17531	88	–	107	776.364	2326.07	2326.06	2.09	2	48	0.00018	1	U	K.FGVEQDRMDKSAVGHEYQSK.L + _Oxidation (M)
11139	95	–	107	493.901	1478.68	1478.68	-0.62	1	28	0.0059	1	U	R.MDKSAVGHEYQSK.L
11140	95	–	107	740.348	1478.68	1478.68	-0.088	1	56	1.1e-05	1	U	R.MDKSAVGHEYQSK.L
11363	95	–	107	748.347	1494.68	1494.68	0.94	1	76	2.2e-07	1	U	R.MDKSAVGHEYQSK.L + _Oxidation (M)
11364	95	–	107	499.233	1494.68	1494.68	0.97	1	60	3.5e-06	1	U	R.MDKSAVGHEYQSK.L + _Oxidation (M)
5633	98	–	107	553.267	1104.52	1104.52	-0.64	0	60	4.5e-06	1	U	K.SAVGHEYQSK.L
5635	98	–	107	369.181	1104.52	1104.52	0.16	0	54	1.8e-05	1	U	K.SAVGHEYQSK.L
5636	98	–	107	553.268	1104.52	1104.52	0.47	0	70	6.5e-07	1	U	K.SAVGHEYQSK.L
5637	98	–	107	553.268	1104.52	1104.52	0.57	0	64	2.6e-06	1	U	K.SAVGHEYQSK.L
5638	98	–	107	553.268	1104.52	1104.52	0.9	0	54	1.1e-05	1	U	K.SAVGHEYQSK.L
5639	98	–	107	553.268	1104.52	1104.52	1.23	0	39	0.0009	1	U	K.SAVGHEYQSK.L
10509	98	–	110	478.584	1432.73	1432.73	-0.11	1	30	0.01	1	U	K.SAVGHEYQSKLSK.H
10510	98	–	110	717.373	1432.73	1432.73	0.7	1	33	0.0012	1	U	K.SAVGHEYQSKLSK.H
10200	108	–	119	472.573	1414.7	1414.7	-1.33	1	40	0.00067	1	U	K.LSKHCSQVDSVR.G
10201	108	–	119	472.574	1414.7	1414.7	-0.041	1	47	7.9e-05	1	U	K.LSKHCSQVDSVR.G
10202	108	–	119	472.574	1414.7	1414.7	0.023	1	40	0.00062	1	U	K.LSKHCSQVDSVR.G
5258	111	–	119	544.251	1086.49	1086.49	-0.34	0	43	9.5e-05	1	U	K.HCSQVDSVR.G
5259	111	–	119	544.251	1086.49	1086.49	-0.34	0	36	0.00045	1	U	K.HCSQVDSVR.G
5261	111	–	119	544.251	1086.49	1086.49	-0.12	0	27	0.0029	1	U	K.HCSQVDSVR.G
5263	111	–	119	363.17	1086.49	1086.49	-0.077	0	36	0.0014	1	U	K.HCSQVDSVR.G
5265	111	–	119	544.251	1086.49	1086.49	0.1	0	37	0.00058	1	U	K.HCSQVDSVR.G
5266	111	–	119	544.251	1086.49	1086.49	0.21	0	29	0.002	1	U	K.HCSQVDSVR.G
5268	111	–	119	544.251	1086.49	1086.49	0.43	0	39	0.00065	1	U	K.HCSQVDSVR.G
5269	111	–	119	544.251	1086.49	1086.49	0.43	0	43	0.00037	1	U	K.HCSQVDSVR.G
5271	111	–	119	544.251	1086.49	1086.49	0.54	0	36	0.00044	1	U	K.HCSQVDSVR.G
5274	111	–	119	363.17	1086.49	1086.49	0.67	0	29	0.0019	1	U	K.HCSQVDSVR.G
5275	111	–	119	544.252	1086.49	1086.49	0.89	0	40	0.00017	1	U	K.HCSQVDSVR.G
5276	111	–	119	544.252	1086.49	1086.49	0.89	0	44	0.00019	1	U	K.HCSQVDSVR.G
5277	111	–	119	544.252	1086.49	1086.49	1.23	0	36	0.00052	1	U	K.HCSQVDSVR.G
8847	120	–	131	649.821	1297.63	1297.62	2.16	1	58	1.5e-05	1	U	R.GFGGKFGVQMDR.V
9038	120	–	131	438.88	1313.62	1313.62	-0.8	1	33	0.0047	1	U	R.GFGGKFGVQMDR.V + _Oxidation (M)
9039	120	–	131	657.817	1313.62	1313.62	0.52	1	69	3.7e-07	1	U	R.GFGGKFGVQMDR.V + _Oxidation (M)
1888	125	–	131	426.705	851.395	851.396	-1.45	0	38	0.00028	1	U	K.FGVQMDR.V
1889	125	–	131	426.705	851.395	851.396	-1.17	0	33	0.00085	1	U	K.FGVQMDR.V
1890	125	–	131	426.705	851.395	851.396	-0.88	0	36	0.00045	1	U	K.FGVQMDR.V
1892	125	–	131	426.705	851.396	851.396	-0.23	0	30	0.0014	1	U	K.FGVQMDR.V
2040	125	–	131	434.702	867.39	867.391	-0.98	0	37	0.00043	1	U	K.FGVQMDR.V + _Oxidation (M)
2043	125	–	131	434.702	867.39	867.391	-0.64	0	33	0.0012	1	U	K.FGVQMDR.V + _Oxidation (M)
2044	125	–	131	434.702	867.39	867.391	-0.64	0	33	0.0012	1	U	K.FGVQMDR.V + _Oxidation (M)
2047	125	–	131	434.702	867.39	867.391	-0.5	0	39	0.00027	1	U	K.FGVQMDR.V + _Oxidation (M)
2049	125	–	131	434.702	867.39	867.391	-0.43	0	43	0.00013	1	U	K.FGVQMDR.V + _Oxidation (M)
2050	125	–	131	434.703	867.391	867.391	-0.34	0	38	0.00034	1	U	K.FGVQMDR.V + _Oxidation (M)
2052	125	–	131	434.703	867.391	867.391	-0.2	0	27	0.0043	1	U	K.FGVQMDR.V + _Oxidation (M)
2054	125	–	131	434.703	867.391	867.391	-0.13	0	26	0.0062	1	U	K.FGVQMDR.V + _Oxidation (M)
2057	125	–	131	434.703	867.391	867.391	0.0092	0	28	0.004	1	U	K.FGVQMDR.V + _Oxidation (M)
2060	125	–	131	434.703	867.391	867.391	0.29	0	33	0.0014	1	U	K.FGVQMDR.V + _Oxidation (M)
2061	125	–	131	434.703	867.391	867.391	0.36	0	32	0.0018	1	U	K.FGVQMDR.V + _Oxidation (M)
2062	125	–	131	434.703	867.391	867.391	0.42	0	31	0.0019	1	U	K.FGVQMDR.V + _Oxidation (M)
17170	125	–	144	754.36	2260.06	2260.06	0.41	1	52	2.4e-05	1	U	K.FGVQMDRVDQSAVGFEYQGK.T
18428	125	–	147	879.089	2634.24	2634.24	2.41	2	28	0.0024	1	U	K.FGVQMDRVDQSAVGFEYQGKTEK.H + _Oxidation (M)
10385	132	–	144	714.343	1426.67	1426.67	-0.88	0	29	0.0018	1	U	R.VDQSAVGFEYQGK.T
10386	132	–	144	714.343	1426.67	1426.67	-0.8	0	48	8.9e-05	1	U	R.VDQSAVGFEYQGK.T
10387	132	–	144	714.343	1426.67	1426.67	-0.8	0	45	6.3e-05	1	U	R.VDQSAVGFEYQGK.T
10388	132	–	144	476.565	1426.67	1426.67	-0.42	0	58	4e-06	1	U	R.VDQSAVGFEYQGK.T
10390	132	–	144	714.343	1426.67	1426.67	-0.28	0	84	3.8e-08	1	U	R.VDQSAVGFEYQGK.T
10391	132	–	144	714.344	1426.67	1426.67	-0.2	0	68	8.8e-07	1	U	R.VDQSAVGFEYQGK.T
10393	132	–	144	714.344	1426.67	1426.67	-0.027	0	27	0.0027	1	U	R.VDQSAVGFEYQGK.T
10395	132	–	144	714.344	1426.67	1426.67	0.057	0	46	5.3e-05	1	U	R.VDQSAVGFEYQGK.T
10396	132	–	144	714.344	1426.67	1426.67	0.057	0	34	0.00061	1	U	R.VDQSAVGFEYQGK.T
10397	132	–	144	714.344	1426.67	1426.67	0.14	0	43	9.2e-05	1	U	R.VDQSAVGFEYQGK.T
10398	132	–	144	714.344	1426.67	1426.67	0.14	0	63	1.2e-06	1	U	R.VDQSAVGFEYQGK.T
10399	132	–	144	714.344	1426.67	1426.67	0.14	0	60	2.3e-06	1	U	R.VDQSAVGFEYQGK.T
10400	132	–	144	714.344	1426.67	1426.67	0.14	0	54	3.6e-05	1	U	R.VDQSAVGFEYQGK.T
10402	132	–	144	714.344	1426.67	1426.67	0.31	0	62	1.6e-06	1	U	R.VDQSAVGFEYQGK.T
10403	132	–	144	714.344	1426.67	1426.67	0.39	0	48	5.3e-05	1	U	R.VDQSAVGFEYQGK.T
10404	132	–	144	714.344	1426.67	1426.67	0.39	0	51	1.8e-05	1	U	R.VDQSAVGFEYQGK.T
10406	132	–	144	714.344	1426.67	1426.67	0.39	0	44	9.7e-05	1	U	R.VDQSAVGFEYQGK.T
10407	132	–	144	714.344	1426.67	1426.67	0.58	0	40	0.00021	1	U	R.VDQSAVGFEYQGK.T
10408	132	–	144	714.344	1426.67	1426.67	0.58	0	44	7.8e-05	1	U	R.VDQSAVGFEYQGK.T
10409	132	–	144	714.344	1426.67	1426.67	0.58	0	96	2.2e-09	1	U	R.VDQSAVGFEYQGK.T
10410	132	–	144	714.344	1426.67	1426.67	0.74	0	48	2.8e-05	1	U	R.VDQSAVGFEYQGK.T
10412	132	–	144	714.344	1426.67	1426.67	1	0	71	2e-07	1	U	R.VDQSAVGFEYQGK.T
10413	132	–	144	714.345	1426.67	1426.67	1.25	0	44	0.0001	1	U	R.VDQSAVGFEYQGK.T
10414	132	–	144	714.345	1426.67	1426.67	1.25	0	45	6.7e-05	1	U	R.VDQSAVGFEYQGK.T
10415	132	–	144	714.345	1426.67	1426.67	1.35	0	106	2.5e-10	1	U	R.VDQSAVGFEYQGK.T
10416	132	–	144	714.345	1426.67	1426.67	1.51	0	61	2e-06	1	U	R.VDQSAVGFEYQGK.T
10417	132	–	144	714.345	1426.67	1426.67	1.51	0	42	0.00013	1	U	R.VDQSAVGFEYQGK.T
10418	132	–	144	714.345	1426.67	1426.67	1.51	0	67	1.8e-06	1	U	R.VDQSAVGFEYQGK.T
10419	132	–	144	714.345	1426.68	1426.67	1.6	0	32	0.0012	1	U	R.VDQSAVGFEYQGK.T
10420	132	–	144	714.345	1426.68	1426.67	1.68	0	43	9.4e-05	1	U	R.VDQSAVGFEYQGK.T
10421	132	–	144	714.345	1426.68	1426.67	1.68	0	44	7.1e-05	1	U	R.VDQSAVGFEYQGK.T
10423	132	–	144	714.345	1426.68	1426.67	1.94	0	78	1.5e-07	1	U	R.VDQSAVGFEYQGK.T
10424	132	–	144	714.345	1426.68	1426.67	2.1	0	31	0.0067	2	U	R.VDQSAVGFEYQGK.T
10426	132	–	144	714.346	1426.68	1426.67	3.39	0	47	4e-05	1	U	R.VDQSAVGFEYQGK.T
14382	132	–	147	893.435	1784.86	1784.86	-1.62	1	90	1.3e-08	1	U	R.VDQSAVGFEYQGKTEK.H
14383	132	–	147	595.96	1784.86	1784.86	0.6	1	33	0.0045	1	U	R.VDQSAVGFEYQGKTEK.H
2787	145	–	152	464.746	927.477	927.477	-0.046	1	42	0.00018	1	U	K.TEKHASQK.D
11003	148	–	161	734.843	1467.67	1467.67	-1.31	1	79	7.4e-08	1	U	K.HASQKDYSSGFGGK.Y
11004	148	–	161	490.232	1467.67	1467.67	0.066	1	45	0.0001	1	U	K.HASQKDYSSGFGGK.Y
11006	148	–	161	490.232	1467.68	1467.67	0.74	1	44	0.00017	1	U	K.HASQKDYSSGFGGK.Y
11962	148	–	161	516.888	1547.64	1547.64	0.56	1	37	0.00037	1	U	K.HASQKDYSSGFGGK.Y + Phospho (ST)
2711	153	–	161	459.203	916.391	916.393	-1.66	0	33	0.002	1	U	K.DYSSGFGGK.Y
2714	153	–	161	459.204	916.393	916.393	-0.2	0	39	0.00046	1	U	K.DYSSGFGGK.Y
2719	153	–	161	459.204	916.393	916.393	0.063	0	25	0.011	1	U	K.DYSSGFGGK.Y
2720	153	–	161	459.204	916.393	916.393	0.13	0	33	0.0017	1	U	K.DYSSGFGGK.Y
2727	153	–	161	459.204	916.394	916.393	1.2	0	35	0.0011	1	U	K.DYSSGFGGK.Y
13729	153	–	168	569.597	1705.77	1705.77	-0.41	1	63	4.6e-06	1	U	K.DYSSGFGGKYGVQADR.V
13730	153	–	168	853.892	1705.77	1705.77	-0.21	1	109	1.7e-10	1	U	K.DYSSGFGGKYGVQADR.V
1371	162	–	168	404.701	807.387	807.388	-0.65	0	38	0.00044	1	U	K.YGVQADR.V
1372	162	–	168	404.701	807.387	807.388	-0.48	0	45	9.8e-05	1	U	K.YGVQADR.V
1373	162	–	168	404.701	807.387	807.388	-0.48	0	44	0.0001	1	U	K.YGVQADR.V
1374	162	–	168	404.701	807.387	807.388	-0.25	0	27	0.0061	1	U	K.YGVQADR.V
1376	162	–	168	404.701	807.388	807.388	0.045	0	27	0.0052	1	U	K.YGVQADR.V
6457	162	–	171	384.2	1149.58	1149.58	-0.31	1	33	0.001	1	U	K.YGVQADRVDK.S
6459	162	–	171	384.2	1149.58	1149.58	-0.23	1	27	0.0032	1	U	K.YGVQADRVDK.S
6461	162	–	171	575.796	1149.58	1149.58	0.12	1	41	0.00022	1	U	K.YGVQADRVDK.S
6462	162	–	171	575.796	1149.58	1149.58	0.24	1	49	8.6e-05	1	U	K.YGVQADRVDK.S
16844	162	–	181	735.03	2202.07	2202.07	-0.96	2	64	3.2e-06	1	U	K.YGVQADRVDKSAVGFDYQGK.T
10176	169	–	181	471.904	1412.69	1412.69	-1.28	1	52	3.7e-05	1	U	R.VDKSAVGFDYQGK.T
10177	169	–	181	707.354	1412.69	1412.69	0.16	1	84	3.7e-08	1	U	R.VDKSAVGFDYQGK.T
4992	172	–	181	536.259	1070.5	1070.5	-0.012	0	37	0.00031	1	U	K.SAVGFDYQGK.T
4993	172	–	181	536.26	1070.5	1070.5	1.24	0	49	2.8e-05	1	U	K.SAVGFDYQGK.T
10458	172	–	184	477.237	1428.69	1428.69	0.15	1	42	0.00033	1	U	K.SAVGFDYQGKTEK.H
10460	172	–	184	715.354	1428.69	1428.69	2.95	1	66	2.4e-06	1	U	K.SAVGFDYQGKTEK.H
4028	182	–	189	507.752	1013.49	1013.49	-0.25	1	41	0.00028	1	U	K.TEKHESQR.D
4034	182	–	189	507.752	1013.49	1013.49	0.4	1	33	0.0021	1	U	K.TEKHESQR.D
4038	182	–	189	507.752	1013.49	1013.49	0.78	1	38	0.00055	1	U	K.TEKHESQR.D
3185	190	–	198	479.735	957.456	957.456	-0.051	1	31	0.0041	1	U	R.DYSKGFGGK.Y
3186	190	–	198	479.735	957.456	957.456	0.58	1	57	1.1e-05	1	U	R.DYSKGFGGK.Y
8633	194	–	205	642.833	1283.65	1283.65	0.36	2	27	0.016	1	U	K.GFGGKYGIDKDK.V
12742	194	–	208	542.955	1625.84	1625.84	0.16	3	38	0.00028	1	U	K.GFGGKYGIDKDKVDK.S
12744	194	–	208	813.929	1625.84	1625.84	1.33	3	48	0.00015	1	U	K.GFGGKYGIDKDKVDK.S
6999	199	–	208	394.211	1179.61	1179.61	-1.02	2	38	0.00074	1	U	K.YGIDKDKVDK.S
7000	199	–	208	394.211	1179.61	1179.61	-0.91	2	36	0.0019	1	U	K.YGIDKDKVDK.S
7003	199	–	208	394.212	1179.61	1179.61	-0.84	2	42	0.0002	1	U	K.YGIDKDKVDK.S
7004	199	–	208	394.212	1179.61	1179.61	-0.84	2	32	0.00098	1	U	K.YGIDKDKVDK.S
7007	199	–	208	394.212	1179.61	1179.61	-0.69	2	26	0.008	1	U	K.YGIDKDKVDK.S
7009	199	–	208	394.212	1179.61	1179.61	-0.53	2	29	0.0019	1	U	K.YGIDKDKVDK.S
7013	199	–	208	590.814	1179.61	1179.61	-0.45	2	55	2.2e-05	1	U	K.YGIDKDKVDK.S
7018	199	–	208	394.212	1179.61	1179.61	-0.23	2	30	0.0045	1	U	K.YGIDKDKVDK.S
7022	199	–	208	590.814	1179.61	1179.61	0.28	2	37	0.0014	1	U	K.YGIDKDKVDK.S
7024	199	–	208	590.814	1179.61	1179.61	0.38	2	55	1.8e-05	1	U	K.YGIDKDKVDK.S
7027	199	–	208	590.814	1179.61	1179.61	0.58	2	68	1.2e-06	1	U	K.YGIDKDKVDK.S
7029	199	–	208	590.814	1179.61	1179.61	0.68	2	50	3e-05	1	U	K.YGIDKDKVDK.S
8286	199	–	208	630.796	1259.58	1259.58	-1.6	2	27	0.0084	1	U	K.YGIDKDKVDK.S + Phospho (Y)
17091	199	–	218	749.713	2246.12	2246.12	-1.84	3	43	9e-05	1	U	K.YGIDKDKVDKSAVGFEYQGK.T
17092	199	–	218	562.537	2246.12	2246.12	-1.25	3	38	0.0003	1	U	K.YGIDKDKVDKSAVGFEYQGK.T
17093	199	–	218	749.715	2246.12	2246.12	0.77	3	49	2.3e-05	1	U	K.YGIDKDKVDKSAVGFEYQGK.T
13311	204	–	218	557.618	1669.83	1669.83	0.79	2	52	2.8e-05	1	U	K.DKVDKSAVGFEYQGK.T
10429	206	–	218	476.577	1426.71	1426.71	-1.02	1	39	0.00098	1	U	K.VDKSAVGFEYQGK.T
10430	206	–	218	714.362	1426.71	1426.71	-0.19	1	75	2.3e-07	1	U	K.VDKSAVGFEYQGK.T
5188	209	–	218	543.266	1084.52	1084.52	-1.49	0	34	0.00065	1	U	K.SAVGFEYQGK.T
5189	209	–	218	543.266	1084.52	1084.52	-1.27	0	42	0.00013	1	U	K.SAVGFEYQGK.T
5192	209	–	218	543.266	1084.52	1084.52	-0.92	0	39	0.00023	1	U	K.SAVGFEYQGK.T
5193	209	–	218	543.266	1084.52	1084.52	-0.8	0	29	0.0021	1	U	K.SAVGFEYQGK.T
5194	209	–	218	543.266	1084.52	1084.52	-0.47	0	27	0.0028	1	U	K.SAVGFEYQGK.T
5195	209	–	218	543.266	1084.52	1084.52	-0.47	0	34	0.00074	1	U	K.SAVGFEYQGK.T
5196	209	–	218	543.266	1084.52	1084.52	-0.47	0	32	0.0015	1	U	K.SAVGFEYQGK.T
5197	209	–	218	543.266	1084.52	1084.52	-0.36	0	34	0.0007	1	U	K.SAVGFEYQGK.T
5199	209	–	218	543.266	1084.52	1084.52	-0.36	0	35	0.00056	1	U	K.SAVGFEYQGK.T
5200	209	–	218	543.266	1084.52	1084.52	-0.36	0	36	0.00041	1	U	K.SAVGFEYQGK.T
5201	209	–	218	543.267	1084.52	1084.52	-0.25	0	48	2.9e-05	1	U	K.SAVGFEYQGK.T
5202	209	–	218	543.267	1084.52	1084.52	-0.25	0	31	0.0012	1	U	K.SAVGFEYQGK.T
5205	209	–	218	543.267	1084.52	1084.52	-0.14	0	37	0.00036	1	U	K.SAVGFEYQGK.T
5206	209	–	218	543.267	1084.52	1084.52	-0.03	0	50	2e-05	1	U	K.SAVGFEYQGK.T
5208	209	–	218	543.267	1084.52	1084.52	-0.03	0	27	0.0032	1	U	K.SAVGFEYQGK.T
5209	209	–	218	543.267	1084.52	1084.52	-0.03	0	32	0.0051	1	U	K.SAVGFEYQGK.T
5211	209	–	218	543.267	1084.52	1084.52	0.08	0	47	8.9e-05	1	U	K.SAVGFEYQGK.T
5212	209	–	218	543.267	1084.52	1084.52	0.08	0	30	0.0015	1	U	K.SAVGFEYQGK.T
5215	209	–	218	543.267	1084.52	1084.52	0.21	0	49	2.8e-05	1	U	K.SAVGFEYQGK.T
5216	209	–	218	543.267	1084.52	1084.52	0.21	0	29	0.0041	1	U	K.SAVGFEYQGK.T
5218	209	–	218	543.267	1084.52	1084.52	0.43	0	31	0.0022	1	U	K.SAVGFEYQGK.T
5219	209	–	218	543.267	1084.52	1084.52	0.43	0	36	0.00041	1	U	K.SAVGFEYQGK.T
5220	209	–	218	543.267	1084.52	1084.52	0.65	0	36	0.00046	1	U	K.SAVGFEYQGK.T
5221	209	–	218	543.267	1084.52	1084.52	0.87	0	40	0.00019	1	U	K.SAVGFEYQGK.T
5222	209	–	218	543.267	1084.52	1084.52	0.87	0	37	0.00032	1	U	K.SAVGFEYQGK.T
5223	209	–	218	543.267	1084.52	1084.52	0.87	0	26	0.0034	1	U	K.SAVGFEYQGK.T
5224	209	–	218	543.267	1084.52	1084.52	1.09	0	34	0.00069	1	U	K.SAVGFEYQGK.T
5225	209	–	218	543.267	1084.52	1084.52	1.09	0	36	0.00043	1	U	K.SAVGFEYQGK.T
5226	209	–	218	543.267	1084.52	1084.52	1.21	0	40	0.00019	1	U	K.SAVGFEYQGK.T
5228	209	–	218	543.267	1084.52	1084.52	1.21	0	32	0.0013	1	U	K.SAVGFEYQGK.T
5229	209	–	218	543.267	1084.52	1084.52	1.21	0	31	0.0012	1	U	K.SAVGFEYQGK.T
5233	209	–	218	543.268	1084.52	1084.52	2.11	0	31	0.0013	1	U	K.SAVGFEYQGK.T
10658	209	–	221	481.909	1442.7	1442.7	-0.12	1	36	0.0021	1	U	K.SAVGFEYQGKTEK.H
10659	209	–	221	722.36	1442.7	1442.7	0.54	1	69	1.2e-06	1	U	K.SAVGFEYQGKTEK.H
16053	209	–	226	685.004	2051.99	2051.99	-0.83	2	43	0.00011	1	U	K.SAVGFEYQGKTEKHESQK.D
16054	209	–	226	514.005	2051.99	2051.99	-0.15	2	40	0.00036	1	U	K.SAVGFEYQGKTEKHESQK.D
3596	219	–	226	493.749	985.483	985.483	0.28	1	40	0.0004	1	U	K.TEKHESQK.D
3598	219	–	226	493.749	985.483	985.483	0.53	1	39	0.00055	1	U	K.TEKHESQK.D
3599	219	–	226	493.749	985.484	985.483	0.77	1	40	0.00043	1	U	K.TEKHESQK.D
11302	219	–	230	497.919	1490.74	1490.74	-0.93	2	30	0.0043	1	U	K.TEKHESQKDYVK.G
11304	219	–	230	497.92	1490.74	1490.74	0.038	2	57	1.4e-05	1	U	K.TEKHESQKDYVK.G
11305	219	–	230	497.92	1490.74	1490.74	0.098	2	27	0.02	1	U	K.TEKHESQKDYVK.G
11306	219	–	230	497.92	1490.74	1490.74	0.42	2	29	0.0029	1	U	K.TEKHESQKDYVK.G
6123	222	–	230	378.524	1132.55	1132.55	-0.76	1	27	0.014	1	U	K.HESQKDYVK.G
6126	222	–	230	567.283	1132.55	1132.55	-0.019	1	36	0.0021	1	U	K.HESQKDYVK.G
3337	227	–	235	485.753	969.492	969.492	-0.27	1	44	0.00031	1	U	K.DYVKGFGGK.F
8382	231	–	242	423.551	1267.63	1267.63	0.52	1	47	9.1e-05	1	U	K.GFGGKFGVQTDR.Q
8383	231	–	242	634.823	1267.63	1267.63	0.57	1	58	1.6e-05	1	U	K.GFGGKFGVQTDR.Q
1566	236	–	242	411.709	821.403	821.403	0.2	0	36	0.0015	1	U	K.FGVQTDR.Q
1569	236	–	242	411.709	821.403	821.403	0.27	0	28	0.0086	1	U	K.FGVQTDR.Q
1570	236	–	242	411.709	821.404	821.403	0.35	0	32	0.0017	1	U	K.FGVQTDR.Q
7176	236	–	245	398.535	1192.58	1192.58	-0.94	1	29	0.0092	1	U	K.FGVQTDRQDK.C
7180	236	–	245	597.299	1192.58	1192.58	0.46	1	60	8.6e-06	1	U	K.FGVQTDRQDK.C
7986	246	–	255	622.279	1242.54	1242.55	-0.79	0	37	0.0013	1	U	K.CALGWDHQEK.L
3510	256	–	263	491.769	981.523	981.524	-1.18	0	28	0.011	1	U	K.LQLHESQK.D
3511	256	–	263	491.769	981.523	981.524	-1.18	0	28	0.012	1	U	K.LQLHESQK.D
3515	256	–	263	491.769	981.524	981.524	-0.63	0	30	0.0081	1	U	K.LQLHESQK.D
3519	256	–	263	491.769	981.524	981.524	0.13	0	29	0.0094	1	U	K.LQLHESQK.D
9848	256	–	266	694.863	1387.71	1387.71	0.72	1	42	0.00058	1	U	K.LQLHESQKDYK.T
9849	256	–	266	694.863	1387.71	1387.71	1.15	1	29	0.01	1	U	K.LQLHESQKDYK.T
11007	256	–	266	734.845	1467.68	1467.68	-0.25	1	38	0.001	1	U	K.LQLHESQKDYK.T + Phospho (ST)
3372	264	–	272	324.831	971.471	971.471	-0.58	1	42	0.0004	1	U	K.DYKTGFGGK.F
3373	264	–	272	486.743	971.472	971.471	0.65	1	54	2.1e-05	1	U	K.DYKTGFGGK.F
9643	267	–	279	685.346	1368.68	1368.68	-0.85	1	74	2e-07	1	U	K.TGFGGKFGVQSER.Q
9644	267	–	279	457.233	1368.68	1368.68	-0.32	1	52	1.4e-05	1	U	K.TGFGGKFGVQSER.Q
1537	273	–	279	411.708	821.402	821.403	-1.12	0	28	0.0062	1	U	K.FGVQSER.Q
1541	273	–	279	411.709	821.403	821.403	-0.66	0	27	0.009	1	U	K.FGVQSER.Q
1542	273	–	279	411.709	821.403	821.403	-0.51	0	31	0.0036	1	U	K.FGVQSER.Q
1544	273	–	279	411.709	821.403	821.403	-0.44	0	31	0.0034	1	U	K.FGVQSER.Q
1546	273	–	279	411.709	821.403	821.403	-0.37	0	32	0.0025	1	U	K.FGVQSER.Q
1548	273	–	279	411.709	821.403	821.403	-0.29	0	25	0.013	1	U	K.FGVQSER.Q
1551	273	–	279	411.709	821.403	821.403	-0.15	0	25	0.013	1	U	K.FGVQSER.Q
1564	273	–	279	411.709	821.403	821.403	0.15	0	38	0.00096	1	U	K.FGVQSER.Q
1565	273	–	279	411.709	821.403	821.403	0.15	0	38	0.00089	1	U	K.FGVQSER.Q
1567	273	–	279	411.709	821.403	821.403	0.29	0	27	0.0069	1	U	K.FGVQSER.Q
1573	273	–	279	411.709	821.404	821.403	0.46	0	25	0.019	1	U	K.FGVQSER.Q
15885	273	–	290	668.653	2002.94	2002.94	-0.53	1	36	0.00085	1	U	K.FGVQSERQDSAAVGFDYK.E
7331	280	–	290	600.779	1199.54	1199.55	-1.32	0	25	0.014	1	U	R.QDSAAVGFDYK.E
7335	280	–	290	600.78	1199.55	1199.55	-0.3	0	78	1.1e-07	1	U	R.QDSAAVGFDYK.E
7338	280	–	290	600.78	1199.55	1199.55	-0.2	0	33	0.0038	1	U	R.QDSAAVGFDYK.E
7341	280	–	290	600.78	1199.55	1199.55		0	33	0.00084	1	U	R.QDSAAVGFDYK.E
7343	280	–	290	600.78	1199.55	1199.55	0.2	0	35	0.0021	1	U	R.QDSAAVGFDYK.E
7344	280	–	290	600.78	1199.55	1199.55	0.32	0	42	0.00047	1	U	R.QDSAAVGFDYK.E
7345	280	–	290	600.78	1199.55	1199.55	0.32	0	84	3e-08	1	U	R.QDSAAVGFDYK.E
7347	280	–	290	600.78	1199.55	1199.55	0.52	0	82	4.1e-08	1	U	R.QDSAAVGFDYK.E
7348	280	–	290	600.781	1199.55	1199.55	0.72	0	65	2.2e-06	1	U	R.QDSAAVGFDYK.E
7349	280	–	290	600.781	1199.55	1199.55	0.82	0	40	0.00065	1	U	R.QDSAAVGFDYK.E
7350	280	–	290	600.781	1199.55	1199.55	0.82	0	49	6.5e-05	1	U	R.QDSAAVGFDYK.E
7352	280	–	290	600.781	1199.55	1199.55	1.22	0	32	0.0029	1	U	R.QDSAAVGFDYK.E
7353	280	–	290	600.781	1199.55	1199.55	1.43	0	77	1.4e-07	1	U	R.QDSAAVGFDYK.E
10835	280	–	292	486.568	1456.68	1456.68	-0.29	1	43	0.00017	1	U	R.QDSAAVGFDYKEK.L
10837	280	–	292	729.349	1456.68	1456.68	0.27	1	29	0.013	1	U	R.QDSAAVGFDYKEK.L
14278	280	–	295	590.641	1768.9	1768.9	1.54	2	53	3.7e-05	1	U	R.QDSAAVGFDYKEKLAK.H
13594	291	–	304	564.283	1689.83	1689.83	-2.5	2	27	0.0032	1	U	K.EKLAKHESQQDYSK.G
10505	293	–	304	478.572	1432.7	1432.69	0.5	1	47	0.0002	1	U	K.LAKHESQQDYSK.G
10506	293	–	304	717.355	1432.7	1432.69	0.98	1	67	1.8e-06	1	U	K.LAKHESQQDYSK.G
5896	296	–	304	561.246	1120.48	1120.48	-0.67	0	46	0.00013	1	U	K.HESQQDYSK.G
5897	296	–	304	561.246	1120.48	1120.48	-0.44	0	50	2.3e-05	1	U	K.HESQQDYSK.G
5899	296	–	304	561.246	1120.48	1120.48	-0.22	0	60	4.9e-06	1	U	K.HESQQDYSK.G
5900	296	–	304	561.246	1120.48	1120.48	-0.22	0	27	0.003	1	U	K.HESQQDYSK.G
5905	296	–	304	561.247	1120.48	1120.48	0.42	0	39	0.00034	1	U	K.HESQQDYSK.G
5906	296	–	304	561.247	1120.48	1120.48	0.42	0	46	5.1e-05	1	U	K.HESQQDYSK.G
5908	296	–	304	561.247	1120.48	1120.48	0.76	0	25	0.0045	1	U	K.HESQQDYSK.G
5910	296	–	304	561.247	1120.48	1120.48	0.97	0	59	3.8e-06	1	U	K.HESQQDYSK.G
7363	296	–	304	601.23	1200.44	1200.44	0.087	0	31	0.0029	1	U	K.HESQQDYSK.G + Phospho (ST)
4449	305	–	314	347.522	1039.54	1039.55	-0.88	1	33	0.0034	1	U	K.GFGGKYGVQK.D
2009	310	–	316	433.23	864.445	864.445	-0.36	1	45	0.00013	1	U	K.YGVQKDR.M
18234	315	–	336	846.059	2535.15	2535.15	-0.16	2	113	4.9e-11	1	U	K.DRMDKNASTFEDVTQVSSAYQK.T + _Oxidation (M)
17103	317	–	336	1125.02	2248.03	2248.03	0.14	1	125	5.6e-12	1	U	R.MDKNASTFEDVTQVSSAYQK.T
17105	317	–	336	750.351	2248.03	2248.03	0.32	1	60	1.7e-05	1	U	R.MDKNASTFEDVTQVSSAYQK.T
17106	317	–	336	563.015	2248.03	2248.03	0.39	1	55	5.9e-05	1	U	R.MDKNASTFEDVTQVSSAYQK.T
17196	317	–	336	755.682	2264.02	2264.03	-1.59	1	50	0.00013	1	U	R.MDKNASTFEDVTQVSSAYQK.T + _Oxidation (M)
17197	317	–	336	1133.02	2264.03	2264.03	-0.097	1	82	1.3e-07	1	U	R.MDKNASTFEDVTQVSSAYQK.T + _Oxidation (M)
17198	317	–	336	755.683	2264.03	2264.03	0.27	1	70	1.8e-06	1	U	R.MDKNASTFEDVTQVSSAYQK.T + _Oxidation (M)
17199	317	–	336	755.683	2264.03	2264.03	0.44	1	49	6e-05	1	U	R.MDKNASTFEDVTQVSSAYQK.T + _Oxidation (M)
17200	317	–	336	755.684	2264.03	2264.03	1	1	54	1.6e-05	1	U	R.MDKNASTFEDVTQVSSAYQK.T + _Oxidation (M)
17540	317	–	336	777.009	2328.01	2328	3.48	1	35	0.0005	1	U	R.MDKNASTFEDVTQVSSAYQK.T + Phospho (ST)
15026	320	–	336	625.63	1873.87	1873.87	-1.32	0	29	0.01	1	U	K.NASTFEDVTQVSSAYQK.T
15027	320	–	336	937.941	1873.87	1873.87	-0.8	0	85	4.4e-08	1	U	K.NASTFEDVTQVSSAYQK.T
15028	320	–	336	937.941	1873.87	1873.87	-0.67	0	50	0.00013	1	U	K.NASTFEDVTQVSSAYQK.T
15029	320	–	336	625.63	1873.87	1873.87	-0.65	0	30	0.0032	1	U	K.NASTFEDVTQVSSAYQK.T
15030	320	–	336	625.63	1873.87	1873.87	-0.54	0	29	0.0026	1	U	K.NASTFEDVTQVSSAYQK.T
15033	320	–	336	937.942	1873.87	1873.87	-0.34	0	58	5.6e-06	1	U	K.NASTFEDVTQVSSAYQK.T
15034	320	–	336	937.942	1873.87	1873.87	-0.21	0	62	4.3e-06	1	U	K.NASTFEDVTQVSSAYQK.T
15036	320	–	336	625.63	1873.87	1873.87	-0.15	0	32	0.0039	1	U	K.NASTFEDVTQVSSAYQK.T
15038	320	–	336	937.942	1873.87	1873.87	-0.0091	0	63	6.6e-06	1	U	K.NASTFEDVTQVSSAYQK.T
15040	320	–	336	937.942	1873.87	1873.87	0.055	0	67	3e-06	1	U	K.NASTFEDVTQVSSAYQK.T
15041	320	–	336	937.942	1873.87	1873.87	0.12	0	57	2.6e-05	1	U	K.NASTFEDVTQVSSAYQK.T
15042	320	–	336	937.942	1873.87	1873.87	0.12	0	83	2.4e-08	1	U	K.NASTFEDVTQVSSAYQK.T
15043	320	–	336	937.942	1873.87	1873.87	0.12	0	114	5.7e-11	1	U	K.NASTFEDVTQVSSAYQK.T
15044	320	–	336	937.942	1873.87	1873.87	0.18	0	50	2e-05	1	U	K.NASTFEDVTQVSSAYQK.T
15045	320	–	336	937.942	1873.87	1873.87	0.18	0	73	7.4e-07	1	U	K.NASTFEDVTQVSSAYQK.T
15047	320	–	336	625.63	1873.87	1873.87	0.23	0	29	0.005	1	U	K.NASTFEDVTQVSSAYQK.T
15048	320	–	336	625.63	1873.87	1873.87	0.23	0	75	4.3e-07	1	U	K.NASTFEDVTQVSSAYQK.T
15049	320	–	336	937.942	1873.87	1873.87	0.38	0	37	0.00088	1	U	K.NASTFEDVTQVSSAYQK.T
15050	320	–	336	937.942	1873.87	1873.87	0.38	0	55	2.2e-05	1	U	K.NASTFEDVTQVSSAYQK.T
15051	320	–	336	937.942	1873.87	1873.87	0.44	0	59	1.6e-05	1	U	K.NASTFEDVTQVSSAYQK.T
15052	320	–	336	937.942	1873.87	1873.87	0.44	0	60	6.3e-06	1	U	K.NASTFEDVTQVSSAYQK.T
15053	320	–	336	937.942	1873.87	1873.87	0.44	0	102	8.2e-10	1	U	K.NASTFEDVTQVSSAYQK.T
15054	320	–	336	625.631	1873.87	1873.87	0.44	0	70	1.3e-06	1	U	K.NASTFEDVTQVSSAYQK.T
15055	320	–	336	937.942	1873.87	1873.87	0.5	0	31	0.0034	1	U	K.NASTFEDVTQVSSAYQK.T
15056	320	–	336	625.631	1873.87	1873.87	0.54	0	26	0.032	1	U	K.NASTFEDVTQVSSAYQK.T
15061	320	–	336	937.943	1873.87	1873.87	0.64	0	102	8.3e-10	1	U	K.NASTFEDVTQVSSAYQK.T
15062	320	–	336	937.943	1873.87	1873.87	0.77	0	53	6.3e-05	1	U	K.NASTFEDVTQVSSAYQK.T
15063	320	–	336	937.943	1873.87	1873.87	0.83	0	48	9.9e-05	1	U	K.NASTFEDVTQVSSAYQK.T
15064	320	–	336	937.943	1873.87	1873.87	0.9	0	69	1.6e-06	1	U	K.NASTFEDVTQVSSAYQK.T
15066	320	–	336	937.943	1873.87	1873.87	0.96	0	49	0.00017	1	U	K.NASTFEDVTQVSSAYQK.T
15067	320	–	336	937.943	1873.87	1873.87	0.96	0	68	6.1e-07	1	U	K.NASTFEDVTQVSSAYQK.T
15069	320	–	336	937.943	1873.87	1873.87	1.22	0	60	6.8e-06	1	U	K.NASTFEDVTQVSSAYQK.T
15071	320	–	336	625.631	1873.87	1873.87	1.42	0	40	0.0013	1	U	K.NASTFEDVTQVSSAYQK.T
15073	320	–	336	937.943	1873.87	1873.87	1.42	0	117	2.3e-11	1	U	K.NASTFEDVTQVSSAYQK.T
15076	320	–	336	625.631	1873.87	1873.87	1.51	0	62	9.2e-06	1	U	K.NASTFEDVTQVSSAYQK.T
15078	320	–	336	937.944	1873.87	1873.87	1.81	0	96	3.7e-09	1	U	K.NASTFEDVTQVSSAYQK.T
15081	320	–	336	937.944	1873.87	1873.87	2.26	0	68	9.1e-07	1	U	K.NASTFEDVTQVSSAYQK.T
15082	320	–	336	625.632	1873.87	1873.87	2.3	0	25	0.023	1	U	K.NASTFEDVTQVSSAYQK.T
18891	320	–	346	962.818	2885.43	2885.43	0.62	1	106	3.3e-10	1	U	K.NASTFEDVTQVSSAYQKTVPVEAVTSK.T
4345	337	–	346	515.791	1029.57	1029.57	-2.24	0	31	0.0012	1	U	K.TVPVEAVTSK.T
4346	337	–	346	515.792	1029.57	1029.57	-0.82	0	31	0.0023	1	U	K.TVPVEAVTSK.T
4347	337	–	346	515.792	1029.57	1029.57	-0.57	0	33	0.00083	1	U	K.TVPVEAVTSK.T
4349	337	–	346	515.792	1029.57	1029.57	-0.45	0	34	0.00065	1	U	K.TVPVEAVTSK.T
4350	337	–	346	515.792	1029.57	1029.57	-0.45	0	34	0.00069	1	U	K.TVPVEAVTSK.T
4351	337	–	346	515.792	1029.57	1029.57	-0.34	0	35	0.0005	1	U	K.TVPVEAVTSK.T
4352	337	–	346	515.792	1029.57	1029.57	-0.34	0	36	0.00041	1	U	K.TVPVEAVTSK.T
4353	337	–	346	515.792	1029.57	1029.57	-0.34	0	30	0.0015	1	U	K.TVPVEAVTSK.T
4355	337	–	346	515.792	1029.57	1029.57	-0.34	0	53	1.3e-05	1	U	K.TVPVEAVTSK.T
4358	337	–	346	515.793	1029.57	1029.57	-0.22	0	25	0.0042	1	U	K.TVPVEAVTSK.T
4359	337	–	346	515.793	1029.57	1029.57	-0.22	0	30	0.0016	1	U	K.TVPVEAVTSK.T
4360	337	–	346	515.793	1029.57	1029.57	-0.22	0	30	0.0017	1	U	K.TVPVEAVTSK.T
4362	337	–	346	515.793	1029.57	1029.57	-0.1	0	35	0.00055	1	U	K.TVPVEAVTSK.T
4363	337	–	346	515.793	1029.57	1029.57	-0.1	0	38	0.00025	1	U	K.TVPVEAVTSK.T
4364	337	–	346	515.793	1029.57	1029.57	-0.1	0	32	0.0015	1	U	K.TVPVEAVTSK.T
4365	337	–	346	515.793	1029.57	1029.57	-0.1	0	36	0.00095	1	U	K.TVPVEAVTSK.T
4366	337	–	346	515.793	1029.57	1029.57	0.015	0	51	1.7e-05	1	U	K.TVPVEAVTSK.T
4367	337	–	346	515.793	1029.57	1029.57	0.015	0	37	0.00034	1	U	K.TVPVEAVTSK.T
4368	337	–	346	515.793	1029.57	1029.57	0.015	0	43	8.5e-05	1	U	K.TVPVEAVTSK.T
4369	337	–	346	515.793	1029.57	1029.57	0.015	0	28	0.0025	1	U	K.TVPVEAVTSK.T
4370	337	–	346	515.793	1029.57	1029.57	0.015	0	39	0.00022	1	U	K.TVPVEAVTSK.T
4371	337	–	346	515.793	1029.57	1029.57	0.015	0	29	0.0066	1	U	K.TVPVEAVTSK.T
4372	337	–	346	515.793	1029.57	1029.57	0.015	0	27	0.0027	1	U	K.TVPVEAVTSK.T
4373	337	–	346	515.793	1029.57	1029.57	0.015	0	36	0.00039	1	U	K.TVPVEAVTSK.T
4374	337	–	346	515.793	1029.57	1029.57	0.13	0	49	2.7e-05	1	U	K.TVPVEAVTSK.T
4375	337	–	346	515.793	1029.57	1029.57	0.13	0	35	0.00055	1	U	K.TVPVEAVTSK.T
4376	337	–	346	515.793	1029.57	1029.57	0.13	0	26	0.01	1	U	K.TVPVEAVTSK.T
4377	337	–	346	515.793	1029.57	1029.57	0.25	0	36	0.00038	1	U	K.TVPVEAVTSK.T
4378	337	–	346	515.793	1029.57	1029.57	0.25	0	44	0.00013	1	U	K.TVPVEAVTSK.T
4379	337	–	346	515.793	1029.57	1029.57	0.25	0	33	0.00076	1	U	K.TVPVEAVTSK.T
4380	337	–	346	515.793	1029.57	1029.57	0.25	0	29	0.0017	1	U	K.TVPVEAVTSK.T
4381	337	–	346	515.793	1029.57	1029.57	0.25	0	34	0.00064	1	U	K.TVPVEAVTSK.T
4382	337	–	346	515.793	1029.57	1029.57	0.25	0	38	0.00026	1	U	K.TVPVEAVTSK.T
4383	337	–	346	515.793	1029.57	1029.57	0.25	0	44	0.00014	1	U	K.TVPVEAVTSK.T
4384	337	–	346	515.793	1029.57	1029.57	0.25	0	29	0.0032	1	U	K.TVPVEAVTSK.T
4385	337	–	346	515.793	1029.57	1029.57	0.38	0	36	0.00044	1	U	K.TVPVEAVTSK.T
4386	337	–	346	515.793	1029.57	1029.57	0.38	0	36	0.0014	1	U	K.TVPVEAVTSK.T
4387	337	–	346	515.793	1029.57	1029.57	0.5	0	37	0.00038	1	U	K.TVPVEAVTSK.T
4388	337	–	346	515.793	1029.57	1029.57	0.5	0	35	0.00055	1	U	K.TVPVEAVTSK.T
4389	337	–	346	515.793	1029.57	1029.57	0.5	0	32	0.0015	1	U	K.TVPVEAVTSK.T
4390	337	–	346	515.793	1029.57	1029.57	0.5	0	34	0.00064	1	U	K.TVPVEAVTSK.T
4391	337	–	346	515.793	1029.57	1029.57	0.5	0	46	7.4e-05	1	U	K.TVPVEAVTSK.T
4392	337	–	346	515.793	1029.57	1029.57	0.5	0	34	0.00073	1	U	K.TVPVEAVTSK.T
4393	337	–	346	515.793	1029.57	1029.57	0.62	0	42	0.00012	1	U	K.TVPVEAVTSK.T
4394	337	–	346	515.793	1029.57	1029.57	0.62	0	50	1.9e-05	1	U	K.TVPVEAVTSK.T
4395	337	–	346	515.793	1029.57	1029.57	0.62	0	39	0.00042	1	U	K.TVPVEAVTSK.T
4396	337	–	346	515.793	1029.57	1029.57	0.73	0	33	0.00089	1	U	K.TVPVEAVTSK.T
4397	337	–	346	515.793	1029.57	1029.57	0.85	0	34	0.00092	1	U	K.TVPVEAVTSK.T
4398	337	–	346	515.793	1029.57	1029.57	0.97	0	31	0.0011	1	U	K.TVPVEAVTSK.T
4399	337	–	346	515.793	1029.57	1029.57	1.2	0	29	0.0018	1	U	K.TVPVEAVTSK.T
4400	337	–	346	515.793	1029.57	1029.57	1.43	0	28	0.0025	1	U	K.TVPVEAVTSK.T
4402	337	–	346	515.793	1029.57	1029.57	1.57	0	33	0.0015	1	U	K.TVPVEAVTSK.T
4403	337	–	346	515.793	1029.57	1029.57	1.8	0	37	0.00036	1	U	K.TVPVEAVTSK.T
4404	337	–	346	515.794	1029.57	1029.57	1.92	0	32	0.0012	1	U	K.TVPVEAVTSK.T
12498	337	–	351	801.446	1600.88	1600.88	-1.16	1	50	2e-05	1	U	K.TVPVEAVTSKTSNIR.A
12499	337	–	351	801.446	1600.88	1600.88	-0.4	1	33	0.00096	1	U	K.TVPVEAVTSKTSNIR.A
12500	337	–	351	534.633	1600.88	1600.88	-0.00062	1	39	0.00021	1	U	K.TVPVEAVTSKTSNIR.A
2543	352	–	359	453.737	905.459	905.461	-1.52	0	38	0.001	1	U	R.ANFENLAK.E
2544	352	–	359	453.737	905.459	905.461	-1.33	0	41	0.00047	1	U	R.ANFENLAK.E
2550	352	–	359	453.737	905.46	905.461	-0.73	0	31	0.0045	1	U	R.ANFENLAK.E
2554	352	–	359	453.738	905.46	905.461	-0.24	0	36	0.00096	1	U	R.ANFENLAK.E
2555	352	–	359	453.738	905.46	905.461	-0.24	0	36	0.0013	1	U	R.ANFENLAK.E
2556	352	–	359	453.738	905.461	905.461	-0.18	0	39	0.00045	1	U	R.ANFENLAK.E
2557	352	–	359	453.738	905.461	905.461	-0.18	0	41	0.00067	1	U	R.ANFENLAK.E
2563	352	–	359	453.738	905.461	905.461	0.022	0	38	0.00087	1	U	R.ANFENLAK.E
2566	352	–	359	453.738	905.461	905.461	0.088	0	38	0.0005	1	U	R.ANFENLAK.E
2567	352	–	359	453.738	905.461	905.461	0.088	0	39	0.0011	1	U	R.ANFENLAK.E
2568	352	–	359	453.738	905.461	905.461	0.22	0	30	0.0036	1	U	R.ANFENLAK.E
2569	352	–	359	453.738	905.461	905.461	0.29	0	32	0.00097	1	U	R.ANFENLAK.E
2571	352	–	359	453.738	905.461	905.461	0.49	0	31	0.0016	1	U	R.ANFENLAK.E
2575	352	–	359	453.738	905.461	905.461	0.55	0	27	0.0077	1	U	R.ANFENLAK.E
2579	352	–	359	453.738	905.461	905.461	0.77	0	34	0.0022	1	U	R.ANFENLAK.E
2580	352	–	359	453.738	905.462	905.461	0.97	0	35	0.0017	1	U	R.ANFENLAK.E
2582	352	–	359	453.738	905.462	905.461	1.1	0	48	7.1e-05	1	U	R.ANFENLAK.E
2583	352	–	359	453.738	905.462	905.461	1.37	0	38	0.0015	1	U	R.ANFENLAK.E
14681	352	–	366	607.631	1819.87	1819.87	1.42	2	35	0.00053	1	U	R.ANFENLAKEKEQEDR.R
15753	352	–	367	659.666	1975.98	1975.97	2.04	3	26	0.0034	1	U	R.ANFENLAKEKEQEDRR.K
2843	360	–	366	467.216	932.418	932.42	-1.59	1	36	0.0011	1	U	K.EKEQEDR.R
2847	360	–	366	467.217	932.419	932.42	-0.79	1	40	0.00049	1	U	K.EKEQEDR.R
2848	360	–	366	467.217	932.419	932.42	-0.6	1	25	0.017	1	U	K.EKEQEDR.R
2851	360	–	366	467.217	932.419	932.42	-0.41	1	41	0.00036	1	U	K.EKEQEDR.R
2853	360	–	366	467.217	932.42	932.42	-0.28	1	40	0.00049	1	U	K.EKEQEDR.R
2854	360	–	366	467.217	932.42	932.42	-0.085	1	31	0.0039	1	U	K.EKEQEDR.R
2855	360	–	366	467.217	932.42	932.42	-0.02	1	41	0.00036	1	U	K.EKEQEDR.R
5340	360	–	367	545.268	1088.52	1088.52	0.18	2	45	0.00018	1	U	K.EKEQEDRR.K
5342	360	–	367	545.268	1088.52	1088.52	0.18	2	37	0.001	1	U	K.EKEQEDRR.K
5343	360	–	367	545.268	1088.52	1088.52	0.18	2	34	0.0023	1	U	K.EKEQEDRR.K
5348	360	–	367	545.268	1088.52	1088.52	0.53	2	38	0.00066	1	U	K.EKEQEDRR.K
1954	367	–	373	287.163	858.466	858.467	-0.91	2	30	0.0072	1	U	R.RKAEAER.A
1955	367	–	373	287.163	858.466	858.467	-0.91	2	39	0.00079	1	U	R.RKAEAER.A
1957	367	–	373	430.241	858.467	858.467	-0.34	2	32	0.0048	1	U	R.RKAEAER.A
6877	380	–	388	587.776	1173.54	1173.54	-0.68	1	52	3.1e-05	1	U	K.ERQEQEEAR.R
6879	380	–	388	392.186	1173.54	1173.54	-0.32	1	36	0.0013	1	U	K.ERQEQEEAR.R
6880	380	–	388	587.776	1173.54	1173.54	0.69	1	45	0.00018	1	U	K.ERQEQEEAR.R
6881	380	–	388	587.776	1173.54	1173.54	0.79	1	57	8.8e-06	1	U	K.ERQEQEEAR.R
9233	380	–	389	665.827	1329.64	1329.64	0.68	2	32	0.0068	1	U	K.ERQEQEEARR.K
2358	382	–	388	445.204	888.394	888.394	-0.25	0	44	6.1e-05	1	U	R.QEQEEAR.R
4516	382	–	389	523.255	1044.49	1044.49	-0.066	1	32	0.0034	1	U	R.QEQEEARR.K
4518	382	–	389	523.255	1044.5	1044.49	0.51	1	38	0.00069	1	U	R.QEQEEARR.K
4519	382	–	389	523.255	1044.5	1044.49	0.87	1	42	0.00024	1	U	R.QEQEEARR.K
4299	389	–	396	515.294	1028.57	1028.57	0.079	2	42	0.00057	1	U	R.RKLEEQAR.A
2146	390	–	396	437.243	872.471	872.471	-0.5	1	33	0.0054	1	U	R.KLEEQAR.A
2147	390	–	396	437.243	872.471	872.471	-0.43	1	27	0.022	1	U	R.KLEEQAR.A
2149	390	–	396	437.243	872.471	872.471	-0.15	1	29	0.012	1	U	R.KLEEQAR.A
2153	390	–	396	437.243	872.472	872.471	0.49	1	26	0.024	1	U	R.KLEEQAR.A
2154	390	–	396	437.243	872.472	872.471	0.83	1	34	0.0045	2	U	R.KLEEQAR.A
15477	397	–	414	645.337	1932.99	1932.99	-1.48	1	40	0.00056	1	U	R.AKTQTPPVSPAPQPTEER.L
15478	397	–	414	967.502	1932.99	1932.99	-0.47	1	65	2.3e-06	1	U	R.AKTQTPPVSPAPQPTEER.L
15479	397	–	414	645.338	1932.99	1932.99	1.07	1	58	8.5e-06	1	U	R.AKTQTPPVSPAPQPTEER.L
15917	397	–	414	671.993	2012.96	2012.96	0.057	1	52	4.6e-05	1	U	R.AKTQTPPVSPAPQPTEER.L + Phospho (ST)
15918	397	–	414	1007.49	2012.96	2012.96	0.58	1	48	5.6e-05	1	U	R.AKTQTPPVSPAPQPTEER.L + Phospho (ST)
15919	397	–	414	671.994	2012.96	2012.96	0.88	1	41	0.00034	1	U	R.AKTQTPPVSPAPQPTEER.L + Phospho (ST)
16275	397	–	414	698.648	2092.92	2092.92	-0.89	1	28	0.008	1	U	R.AKTQTPPVSPAPQPTEER.L + 2 Phospho (ST)
16276	397	–	414	1047.47	2092.92	2092.92	-0.45	1	59	1.9e-05	1	U	R.AKTQTPPVSPAPQPTEER.L + 2 Phospho (ST)
16278	397	–	414	698.649	2092.92	2092.92	0.43	1	38	0.0027	1	U	R.AKTQTPPVSPAPQPTEER.L + 2 Phospho (ST)
16669	397	–	414	1087.45	2172.89	2172.89	0.02	1	38	0.00031	1	U	R.AKTQTPPVSPAPQPTEER.L + 3 Phospho (ST)
16670	397	–	414	725.304	2172.89	2172.89	0.6	1	31	0.0048	1	U	R.AKTQTPPVSPAPQPTEER.L + 3 Phospho (ST)
20516	397	–	428	1142.58	3424.71	3424.72	-1.58	2	29	0.0051	1	U	R.AKTQTPPVSPAPQPTEERLPSSPVYEDAASFK.A
20517	397	–	428	857.186	3424.72	3424.72	0.074	2	33	0.0014	1	U	R.AKTQTPPVSPAPQPTEERLPSSPVYEDAASFK.A
20518	397	–	428	857.187	3424.72	3424.72	0.49	2	67	1.4e-06	1	U	R.AKTQTPPVSPAPQPTEERLPSSPVYEDAASFK.A
20821	397	–	428	1169.23	3504.67	3504.68	-2.63	2	64	2.6e-06	1	U	R.AKTQTPPVSPAPQPTEERLPSSPVYEDAASFK.A + Phospho (ST)
20822	397	–	428	877.177	3504.68	3504.68	-0.35	2	50	3.2e-05	1	U	R.AKTQTPPVSPAPQPTEERLPSSPVYEDAASFK.A + Phospho (ST)
20823	397	–	428	877.178	3504.68	3504.68	-0.15	2	43	0.00027	1	U	R.AKTQTPPVSPAPQPTEERLPSSPVYEDAASFK.A + Phospho (ST)
20824	397	–	428	1169.23	3504.68	3504.68	0.087	2	61	1.2e-05	1	U	R.AKTQTPPVSPAPQPTEERLPSSPVYEDAASFK.A + Phospho (ST)
20922	397	–	428	1195.89	3584.65	3584.65	-0.67	2	49	0.0004	1	U	R.AKTQTPPVSPAPQPTEERLPSSPVYEDAASFK.A + Phospho (ST); Phospho (Y)
20924	397	–	428	1195.89	3584.65	3584.65	0.96	2	39	0.0048	1	U	R.AKTQTPPVSPAPQPTEERLPSSPVYEDAASFK.A + 2 Phospho (ST)
20925	397	–	428	1195.89	3584.65	3584.65	1.68	2	49	0.00048	1	U	R.AKTQTPPVSPAPQPTEERLPSSPVYEDAASFK.A + Phospho (ST); Phospho (Y)
21002	397	–	428	917.159	3664.61	3664.61	-1.88	2	43	0.00018	1	U	R.AKTQTPPVSPAPQPTEERLPSSPVYEDAASFK.A + 3 Phospho (ST)
21003	397	–	428	1222.55	3664.61	3664.61	-0.091	2	38	0.0012	1	U	R.AKTQTPPVSPAPQPTEERLPSSPVYEDAASFK.A + 3 Phospho (ST)
13974	399	–	414	867.937	1733.86	1733.86	0.32	0	68	4.3e-07	1	U	K.TQTPPVSPAPQPTEER.L
13976	399	–	414	867.937	1733.86	1733.86	0.32	0	34	0.00063	1	U	K.TQTPPVSPAPQPTEER.L
13977	399	–	414	867.937	1733.86	1733.86	0.46	0	55	6.9e-06	1	U	K.TQTPPVSPAPQPTEER.L
13978	399	–	414	578.961	1733.86	1733.86	0.73	0	53	2.6e-05	1	U	K.TQTPPVSPAPQPTEER.L
13979	399	–	414	867.937	1733.86	1733.86	1.03	0	27	0.0042	1	U	K.TQTPPVSPAPQPTEER.L
13980	399	–	414	867.937	1733.86	1733.86	1.1	0	42	0.00011	1	U	K.TQTPPVSPAPQPTEER.L
13981	399	–	414	867.938	1733.86	1733.86	1.3	0	64	1.1e-06	1	U	K.TQTPPVSPAPQPTEER.L
13982	399	–	414	867.938	1733.86	1733.86	1.51	0	41	0.00024	1	U	K.TQTPPVSPAPQPTEER.L
13983	399	–	414	578.961	1733.86	1733.86	1.89	0	51	5.3e-05	1	U	K.TQTPPVSPAPQPTEER.L
14628	399	–	414	907.92	1813.83	1813.82	0.64	0	51	1.9e-05	1	U	K.TQTPPVSPAPQPTEER.L + Phospho (ST)
14629	399	–	414	907.92	1813.83	1813.82	0.77	0	96	1.1e-09	1	U	K.TQTPPVSPAPQPTEER.L + Phospho (ST)
15223	399	–	414	947.903	1893.79	1893.79	0.14	0	94	2.3e-09	1	U	K.TQTPPVSPAPQPTEER.L + 2 Phospho (ST)
15225	399	–	414	947.903	1893.79	1893.79	0.41	0	66	2.1e-06	1	U	K.TQTPPVSPAPQPTEER.L + 2 Phospho (ST)
19523	399	–	428	807.403	3225.58	3225.58	-0.53	1	55	1.6e-05	1	U	K.TQTPPVSPAPQPTEERLPSSPVYEDAASFK.A
19525	399	–	428	1076.2	3225.58	3225.58	-0.4	1	40	0.00029	1	U	K.TQTPPVSPAPQPTEERLPSSPVYEDAASFK.A
19526	399	–	428	1076.2	3225.58	3225.58	-0.4	1	40	0.00028	1	U	K.TQTPPVSPAPQPTEERLPSSPVYEDAASFK.A
19527	399	–	428	1076.2	3225.58	3225.58	-0.057	1	39	0.00037	1	U	K.TQTPPVSPAPQPTEERLPSSPVYEDAASFK.A
19528	399	–	428	1076.2	3225.58	3225.58	0.054	1	39	0.00038	1	U	K.TQTPPVSPAPQPTEERLPSSPVYEDAASFK.A
19529	399	–	428	807.403	3225.58	3225.58	0.15	1	60	5.2e-06	1	U	K.TQTPPVSPAPQPTEERLPSSPVYEDAASFK.A
19530	399	–	428	807.403	3225.58	3225.58	0.3	1	30	0.0015	1	U	K.TQTPPVSPAPQPTEERLPSSPVYEDAASFK.A
19532	399	–	428	1076.2	3225.59	3225.58	0.62	1	40	0.00033	1	U	K.TQTPPVSPAPQPTEERLPSSPVYEDAASFK.A
19678	399	–	428	827.394	3305.55	3305.55	-0.38	1	44	0.00021	1	U	K.TQTPPVSPAPQPTEERLPSSPVYEDAASFK.A + Phospho (ST)
19679	399	–	428	1102.86	3305.55	3305.55	-0.1	1	46	0.00015	1	U	K.TQTPPVSPAPQPTEERLPSSPVYEDAASFK.A + Phospho (ST)
19680	399	–	428	1102.86	3305.55	3305.55	0.34	1	44	0.00011	1	U	K.TQTPPVSPAPQPTEERLPSSPVYEDAASFK.A + Phospho (ST)
19681	399	–	428	827.395	3305.55	3305.55	1.1	1	35	0.0011	1	U	K.TQTPPVSPAPQPTEERLPSSPVYEDAASFK.A + Phospho (ST)
20212	399	–	428	1129.51	3385.51	3385.52	-1.32	1	66	7.7e-06	1	U	K.TQTPPVSPAPQPTEERLPSSPVYEDAASFK.A + Phospho (ST); Phospho (Y)
20213	399	–	428	1129.51	3385.51	3385.52	-0.24	1	51	4e-05	1	U	K.TQTPPVSPAPQPTEERLPSSPVYEDAASFK.A + 2 Phospho (ST)
20214	399	–	428	847.386	3385.52	3385.52	0.13	1	33	0.016	1	U	K.TQTPPVSPAPQPTEERLPSSPVYEDAASFK.A + Phospho (ST); Phospho (Y)
20215	399	–	428	847.386	3385.52	3385.52	0.27	1	47	0.00019	1	U	K.TQTPPVSPAPQPTEERLPSSPVYEDAASFK.A + 2 Phospho (ST)
20216	399	–	428	847.386	3385.52	3385.52	0.42	1	29	0.037	1	U	K.TQTPPVSPAPQPTEERLPSSPVYEDAASFK.A + Phospho (ST); Phospho (Y)
20218	399	–	428	1129.52	3385.53	3385.52	2.89	1	38	0.0052	1	U	K.TQTPPVSPAPQPTEERLPSSPVYEDAASFK.A + Phospho (ST); Phospho (Y)
20699	399	–	428	1156.16	3465.47	3465.48	-2.6	1	43	0.0016	1	U	K.TQTPPVSPAPQPTEERLPSSPVYEDAASFK.A + 2 Phospho (ST); Phospho (Y)
11541	415	–	428	504.252	1509.73	1509.74	-0.6	0	84	1.2e-08	1	U	R.LPSSPVYEDAASFK.A
11544	415	–	428	755.875	1509.73	1509.74	-0.34	0	29	0.0054	1	U	R.LPSSPVYEDAASFK.A
11545	415	–	428	755.875	1509.73	1509.74	-0.34	0	56	9.5e-06	1	U	R.LPSSPVYEDAASFK.A
11546	415	–	428	755.875	1509.73	1509.74	-0.092	0	26	0.0039	1	U	R.LPSSPVYEDAASFK.A
11552	415	–	428	755.875	1509.74	1509.74	0.31	0	88	2.2e-08	1	U	R.LPSSPVYEDAASFK.A
11553	415	–	428	755.875	1509.74	1509.74	0.31	0	80	3.1e-08	1	U	R.LPSSPVYEDAASFK.A
11554	415	–	428	755.875	1509.74	1509.74	0.46	0	28	0.0022	1	U	R.LPSSPVYEDAASFK.A
11555	415	–	428	755.875	1509.74	1509.74	0.46	0	84	2.9e-08	1	U	R.LPSSPVYEDAASFK.A
11558	415	–	428	755.875	1509.74	1509.74	0.8	0	49	4.5e-05	1	U	R.LPSSPVYEDAASFK.A
11559	415	–	428	755.875	1509.74	1509.74	0.8	0	34	0.0006	1	U	R.LPSSPVYEDAASFK.A
11563	415	–	428	755.876	1509.74	1509.74	1.27	0	25	0.0041	1	U	R.LPSSPVYEDAASFK.A
11564	415	–	428	755.876	1509.74	1509.74	1.6	0	34	0.00064	1	U	R.LPSSPVYEDAASFK.A
11567	415	–	428	755.876	1509.74	1509.74	1.92	0	33	0.0024	1	U	R.LPSSPVYEDAASFK.A
12381	415	–	428	795.856	1589.7	1589.7	-1.86	0	63	1.5e-06	1	U	R.LPSSPVYEDAASFK.A + Phospho (ST)
12383	415	–	428	795.857	1589.7	1589.7	-0.72	0	49	2.5e-05	1	U	R.LPSSPVYEDAASFK.A + Phospho (ST)
12385	415	–	428	795.858	1589.7	1589.7	-0.1	0	84	4.8e-08	1	U	R.LPSSPVYEDAASFK.A + Phospho (ST)
12386	415	–	428	795.858	1589.7	1589.7	0.048	0	68	4.7e-07	1	U	R.LPSSPVYEDAASFK.A + Phospho (ST)
12387	415	–	428	530.908	1589.7	1589.7	0.051	0	51	1.8e-05	1	U	R.LPSSPVYEDAASFK.A + Phospho (ST)
12388	415	–	428	795.858	1589.7	1589.7	0.44	0	75	1e-07	1	U	R.LPSSPVYEDAASFK.A + Phospho (ST)
12390	415	–	428	795.859	1589.7	1589.7	0.97	0	29	0.0021	1	U	R.LPSSPVYEDAASFK.A + Phospho (ST)
12392	415	–	428	795.86	1589.71	1589.7	2.51	0	35	0.00047	1	U	R.LPSSPVYEDAASFK.A + Phospho (ST)
13306	415	–	428	835.842	1669.67	1669.67	0.85	0	31	0.0012	1	U	R.LPSSPVYEDAASFK.A + 2 Phospho (ST)
17000	415	–	434	744.039	2229.1	2229.1	0.35	1	57	4.8e-06	1	U	R.LPSSPVYEDAASFKAELSYR.G
17001	415	–	434	744.039	2229.1	2229.1	0.67	1	52	1.8e-05	1	U	R.LPSSPVYEDAASFKAELSYR.G
17451	415	–	434	770.694	2309.06	2309.06	0.037	1	40	0.00018	1	U	R.LPSSPVYEDAASFKAELSYR.G + Phospho (ST)
17452	415	–	434	770.695	2309.06	2309.06	0.27	1	62	1.5e-06	1	U	R.LPSSPVYEDAASFKAELSYR.G + Phospho (ST)
17798	415	–	434	797.349	2389.03	2389.03	-1.17	1	68	4.4e-07	1	U	R.LPSSPVYEDAASFKAELSYR.G + 2 Phospho (ST)
19032	429	–	454	985.433	2953.28	2953.28	-2.85	1	59	9.8e-06	1	U	K.AELSYRGPVSGTEPEPVYSMEAADYR.E + Phospho (ST)
19059	429	–	454	990.769	2969.28	2969.28	1.57	1	53	7.9e-05	1	U	K.AELSYRGPVSGTEPEPVYSMEAADYR.E + _Oxidation (M); Phospho (ST)
16542	435	–	454	718.991	2153.95	2153.96	-3.18	0	67	7.2e-07	1	U	R.GPVSGTEPEPVYSMEAADYR.E
16545	435	–	454	1077.99	2153.96	2153.96	-0.41	0	39	0.00022	1	U	R.GPVSGTEPEPVYSMEAADYR.E
16548	435	–	454	1077.99	2153.96	2153.96	0.49	0	93	2.2e-09	1	U	R.GPVSGTEPEPVYSMEAADYR.E
16550	435	–	454	1077.99	2153.96	2153.96	1.06	0	126	1.9e-12	1	U	R.GPVSGTEPEPVYSMEAADYR.E
16553	435	–	454	718.994	2153.96	2153.96	1.34	0	79	3.6e-08	1	U	R.GPVSGTEPEPVYSMEAADYR.E
16554	435	–	454	718.995	2153.96	2153.96	2.19	0	29	0.0019	1	U	R.GPVSGTEPEPVYSMEAADYR.E
16621	435	–	454	1085.98	2169.95	2169.95	-2.12	0	58	3.8e-06	1	U	R.GPVSGTEPEPVYSMEAADYR.E + _Oxidation (M)
16623	435	–	454	1085.98	2169.95	2169.95	-1.45	0	42	0.00012	1	U	R.GPVSGTEPEPVYSMEAADYR.E + _Oxidation (M)
16624	435	–	454	724.324	2169.95	2169.95	-0.66	0	68	4.2e-07	1	U	R.GPVSGTEPEPVYSMEAADYR.E + _Oxidation (M)
16625	435	–	454	724.324	2169.95	2169.95	-0.66	0	64	1e-06	1	U	R.GPVSGTEPEPVYSMEAADYR.E + _Oxidation (M)
16626	435	–	454	724.324	2169.95	2169.95	-0.66	0	70	2.6e-07	1	U	R.GPVSGTEPEPVYSMEAADYR.E + _Oxidation (M)
16627	435	–	454	1085.98	2169.95	2169.95	-0.66	0	55	6.6e-06	1	U	R.GPVSGTEPEPVYSMEAADYR.E + _Oxidation (M)
16628	435	–	454	1085.98	2169.95	2169.95	-0.66	0	26	0.0035	1	U	R.GPVSGTEPEPVYSMEAADYR.E + _Oxidation (M)
16629	435	–	454	1085.98	2169.95	2169.95	-0.33	0	93	4.8e-09	1	U	R.GPVSGTEPEPVYSMEAADYR.E + _Oxidation (M)
16630	435	–	454	1085.98	2169.95	2169.95	-0.21	0	65	8.3e-07	1	U	R.GPVSGTEPEPVYSMEAADYR.E + _Oxidation (M)
16631	435	–	454	724.325	2169.95	2169.95	0.013	0	63	1.3e-06	1	U	R.GPVSGTEPEPVYSMEAADYR.E + _Oxidation (M)
16632	435	–	454	724.325	2169.95	2169.95	0.013	0	49	7.4e-05	1	U	R.GPVSGTEPEPVYSMEAADYR.E + _Oxidation (M)
16636	435	–	454	1085.98	2169.95	2169.95	0.58	0	54	1.6e-05	1	U	R.GPVSGTEPEPVYSMEAADYR.E + _Oxidation (M)
16637	435	–	454	724.325	2169.95	2169.95	0.59	0	68	2.8e-06	1	U	R.GPVSGTEPEPVYSMEAADYR.E + _Oxidation (M)
16638	435	–	454	1085.98	2169.95	2169.95	0.69	0	63	1.2e-06	1	U	R.GPVSGTEPEPVYSMEAADYR.E + _Oxidation (M)
16641	435	–	454	724.325	2169.95	2169.95	0.94	0	34	0.00062	1	U	R.GPVSGTEPEPVYSMEAADYR.E + _Oxidation (M)
16642	435	–	454	1085.98	2169.95	2169.95	1.03	0	57	4.3e-06	1	U	R.GPVSGTEPEPVYSMEAADYR.E + _Oxidation (M)
16643	435	–	454	724.326	2169.95	2169.95	1.19	0	70	2.5e-07	1	U	R.GPVSGTEPEPVYSMEAADYR.E + _Oxidation (M)
16645	435	–	454	724.326	2169.96	2169.95	1.7	0	67	4.8e-07	1	U	R.GPVSGTEPEPVYSMEAADYR.E + _Oxidation (M)
16646	435	–	454	724.327	2169.96	2169.95	2.79	0	50	3.5e-05	1	U	R.GPVSGTEPEPVYSMEAADYR.E + _Oxidation (M)
17030	435	–	454	1117.97	2233.93	2233.92	2.43	0	28	0.0029	1	U	R.GPVSGTEPEPVYSMEAADYR.E + Phospho (ST)
17118	435	–	454	1125.97	2249.92	2249.92	-0.75	0	46	9.5e-05	1	U	R.GPVSGTEPEPVYSMEAADYR.E + _Oxidation (M); Phospho (ST)
17120	435	–	454	750.981	2249.92	2249.92	0.44	0	40	0.00017	1	U	R.GPVSGTEPEPVYSMEAADYR.E + _Oxidation (M); Phospho (ST)
17122	435	–	454	750.981	2249.92	2249.92	0.93	0	70	2.6e-07	1	U	R.GPVSGTEPEPVYSMEAADYR.E + _Oxidation (M); Phospho (ST)
17123	435	–	454	1125.97	2249.92	2249.92	1.2	0	40	0.00017	1	U	R.GPVSGTEPEPVYSMEAADYR.E + _Oxidation (M); Phospho (ST)
17545	435	–	454	1165.95	2329.89	2329.89	3.36	0	29	0.0041	1	U	R.GPVSGTEPEPVYSMEAADYR.E + _Oxidation (M); 2 Phospho (ST)
10598	538	–	549	481.253	1440.74	1440.74	-0.99	0	65	7.3e-07	1	U	R.YGLFPANYVELR.Q
10599	538	–	549	481.254	1440.74	1440.74	-0.61	0	57	4.4e-06	1	U	R.YGLFPANYVELR.Q
10600	538	–	549	721.377	1440.74	1440.74	-0.46	0	51	1.5e-05	1	U	R.YGLFPANYVELR.Q
10601	538	–	549	721.377	1440.74	1440.74	-0.19	0	44	7.3e-05	1	U	R.YGLFPANYVELR.Q
10602	538	–	549	721.377	1440.74	1440.74	-0.11	0	67	4.9e-07	1	U	R.YGLFPANYVELR.Q
10603	538	–	549	721.377	1440.74	1440.74	-0.11	0	65	8.8e-07	1	U	R.YGLFPANYVELR.Q
10604	538	–	549	721.377	1440.74	1440.74	0.14	0	44	0.0002	1	U	R.YGLFPANYVELR.Q
10605	538	–	549	721.378	1440.74	1440.74	0.22	0	59	3.2e-06	1	U	R.YGLFPANYVELR.Q
10606	538	–	549	721.378	1440.74	1440.74	0.31	0	79	7.3e-08	1	U	R.YGLFPANYVELR.Q
10607	538	–	549	721.378	1440.74	1440.74	0.31	0	59	2.8e-06	1	U	R.YGLFPANYVELR.Q
10608	538	–	549	721.378	1440.74	1440.74	0.39	0	54	8.2e-06	1	U	R.YGLFPANYVELR.Q
10609	538	–	549	721.378	1440.74	1440.74	0.49	0	60	2.2e-06	1	U	R.YGLFPANYVELR.Q
10610	538	–	549	721.378	1440.74	1440.74	0.49	0	48	3.2e-05	1	U	R.YGLFPANYVELR.Q
10611	538	–	549	721.378	1440.74	1440.74	0.57	0	53	1e-05	1	U	R.YGLFPANYVELR.Q
10612	538	–	549	721.378	1440.74	1440.74	0.57	0	64	1e-06	1	U	R.YGLFPANYVELR.Q
10614	538	–	549	721.378	1440.74	1440.74	0.65	0	51	1.5e-05	1	U	R.YGLFPANYVELR.Q
10615	538	–	549	721.378	1440.74	1440.74	0.74	0	45	5.8e-05	1	U	R.YGLFPANYVELR.Q
10616	538	–	549	721.378	1440.74	1440.74	0.82	0	78	5.3e-08	1	U	R.YGLFPANYVELR.Q
10617	538	–	549	721.378	1440.74	1440.74	0.82	0	36	0.00039	1	U	R.YGLFPANYVELR.Q
10618	538	–	549	721.378	1440.74	1440.74	0.9	0	46	4.4e-05	1	U	R.YGLFPANYVELR.Q
10619	538	–	549	721.378	1440.74	1440.74	0.99	0	64	1.1e-06	1	U	R.YGLFPANYVELR.Q
10620	538	–	549	721.378	1440.74	1440.74	0.99	0	57	4.6e-06	1	U	R.YGLFPANYVELR.Q
10621	538	–	549	721.378	1440.74	1440.74	1.07	0	56	2.2e-05	1	U	R.YGLFPANYVELR.Q
10622	538	–	549	721.378	1440.74	1440.74	1.07	0	52	1.5e-05	1	U	R.YGLFPANYVELR.Q
10623	538	–	549	721.378	1440.74	1440.74	1.15	0	63	3.7e-06	1	U	R.YGLFPANYVELR.Q
10624	538	–	549	721.378	1440.74	1440.74	1.15	0	46	5.1e-05	1	U	R.YGLFPANYVELR.Q
10626	538	–	549	721.378	1440.74	1440.74	1.5	0	65	2.7e-06	1	U	R.YGLFPANYVELR.Q
10627	538	–	549	721.379	1440.74	1440.74	1.58	0	56	6.1e-06	1	U	R.YGLFPANYVELR.Q
10628	538	–	549	721.379	1440.74	1440.74	2	0	70	3e-07	1	U	R.YGLFPANYVELR.Q
12142	538	–	550	785.406	1568.8	1568.8	-0.88	1	56	6e-06	1	U	R.YGLFPANYVELRQ.-
12144	538	–	550	785.406	1568.8	1568.8	-0.56	1	43	0.00011	1	U	R.YGLFPANYVELRQ.-
12146	538	–	550	785.406	1568.8	1568.8	-0.48	1	40	0.00017	1	U	R.YGLFPANYVELRQ.-
12147	538	–	550	785.406	1568.8	1568.8	-0.33	1	45	6e-05	1	U	R.YGLFPANYVELRQ.-
12148	538	–	550	785.406	1568.8	1568.8	-0.25	1	31	0.0012	1	U	R.YGLFPANYVELRQ.-
12149	538	–	550	785.406	1568.8	1568.8	-0.25	1	44	8e-05	1	U	R.YGLFPANYVELRQ.-
12150	538	–	550	523.94	1568.8	1568.8	-0.23	1	57	4.2e-06	1	U	R.YGLFPANYVELRQ.-
12151	538	–	550	785.407	1568.8	1568.8	0.22	1	67	5.4e-07	1	U	R.YGLFPANYVELRQ.-
12152	538	–	550	785.407	1568.8	1568.8	0.22	1	60	4.5e-06	1	U	R.YGLFPANYVELRQ.-
12153	538	–	550	785.407	1568.8	1568.8	0.22	1	48	3e-05	1	U	R.YGLFPANYVELRQ.-
12154	538	–	550	523.94	1568.8	1568.8	0.25	1	41	0.00014	1	U	R.YGLFPANYVELRQ.-
12155	538	–	550	785.407	1568.8	1568.8	0.29	1	38	0.00025	1	U	R.YGLFPANYVELRQ.-
12156	538	–	550	523.94	1568.8	1568.8	0.37	1	53	9.7e-06	1	U	R.YGLFPANYVELRQ.-
12157	538	–	550	785.407	1568.8	1568.8	0.52	1	40	0.0002	1	U	R.YGLFPANYVELRQ.-
12158	538	–	550	785.407	1568.8	1568.8	0.52	1	46	4.5e-05	1	U	R.YGLFPANYVELRQ.-
12159	538	–	550	785.407	1568.8	1568.8	0.6	1	33	0.00085	1	U	R.YGLFPANYVELRQ.-
12160	538	–	550	785.407	1568.8	1568.8	0.69	1	31	0.0014	1	U	R.YGLFPANYVELRQ.-
12161	538	–	550	785.407	1568.8	1568.8	0.84	1	43	0.00011	1	U	R.YGLFPANYVELRQ.-
12162	538	–	550	785.408	1568.8	1568.8	1.07	1	46	4.5e-05	1	U	R.YGLFPANYVELRQ.-
12164	538	–	550	785.408	1568.8	1568.8	1.23	1	61	9e-06	1	U	R.YGLFPANYVELRQ.-
12165	538	–	550	785.408	1568.8	1568.8	1.3	1	59	2.8e-06	1	U	R.YGLFPANYVELRQ.-
12166	538	–	550	785.408	1568.8	1568.8	1.7	1	41	0.00013	1	U	R.YGLFPANYVELRQ.-
12167	538	–	550	785.408	1568.8	1568.8	1.77	1	36	0.0004	1	U	R.YGLFPANYVELRQ.-
12168	538	–	550	785.408	1568.8	1568.8	1.85	1	39	0.00023	1	U	R.YGLFPANYVELRQ.-
12169	538	–	550	785.408	1568.8	1568.8	1.93	1	32	0.001	1	U	R.YGLFPANYVELRQ.-
12170	538	–	550	785.408	1568.8	1568.8	2	1	30	0.0014	1	U	R.YGLFPANYVELRQ.-
12171	538	–	550	785.408	1568.8	1568.8	2.08	1	42	0.00011	1	U	R.YGLFPANYVELRQ.-
12172	538	–	550	785.409	1568.8	1568.8	2.47	1	38	0.00026	1	U	R.YGLFPANYVELRQ.-
12173	538	–	550	785.409	1568.8	1568.8	3.72	1	31	0.0012	1	U	R.YGLFPANYVELRQ.-
Error distribution
Mascot: http://www.matrixscience.com/
