# Supplementary material for: p27Kip1 promotes invadopodia turnover and invasion through the regulation of the PAK1/Cortactin pathway
Source: eLife journal article supplement (doi:10.7554/elife.22207), 2017-03-13
Supplement: supp [file elife_poa_e22207_Supplementary_File_1.xlsx]

## Sheet: Feuil1
Mertins P, et al. (2014) Ischemia in tumors induces early and sustained phosphorylation changes in stress kinase pathways but does not affect global protein levels. Mol Cell Proteomics 13, 1690-704
AccessionNumber_Phosphosite_nubmber-of-phosphosites-present-on-peptide_number-localized-sites_earliest-amino-acid_latest-amino-acid (unique id number)	Accession_number (GI number; RefSeq)	Accession_numbers	Entry_name	Species	Kinase? (KinBase annotation; http://kinase.com/human/kinome/)	Parent_m_over_z	Matched_parent_mass	Delta_parent_mass	VariableSites	StartAA	Previous_aa	Sequence	Next_aa	Sequence with variable modification localization scores	Best Spectrum Mill score	Best MS2 scan URL	Regulated by cold ischemia in any of the tumors types?	Quantified in 2 or more basal or luminal breast tumors or 3 or more ovarian tumors?	Quantified in how many time point samples? (all tumors)	Number of quantified ovarian cancer time point ratios	Ovarian tumor 1 JB5427 log2_iTRAQ_115_114_median (5min/0min) normalized	Ovarian tumor 1 JB5427 log2_iTRAQ_116_114_median (30min/0min) normalized	Ovarian tumor 1 JB5427 log2_iTRAQ_117_114_median (60min/0min) normalized	Ovarian tumor 2 JB5429 log2_iTRAQ_114_117_median (5min/0min) normalized	Ovarian tumor 2 JB5429 log2_iTRAQ_115_117_median (30min/0min) normalized	Ovarian tumor 2 JB5429 log2_iTRAQ_116_117_median (60min/0min) normalized	Ovarian tumor 3 JB5439 log2_iTRAQ_116_115_median (5min/0min) normalized	Ovarian tumor 3 JB5439 log2_iTRAQ_117_115_median (30min/0min) normalized	Ovarian tumor 3 JB5439 log2_iTRAQ_114_115_median (60min/0min) normalized	Ovarian tumor 4 JB5464 log2_iTRAQ_117_116_median (5min/0min) normalized	Ovarian tumor 4 JB5464 log2_iTRAQ_114_116_median (30min/0min) normalized	Ovarian tumor 4 JB5464 log2_iTRAQ_115_116_median (60min/0min) normalized	Ovarian cancer average log2 iTRAQ 5/0 min	Ovarian cancer average log2 iTRAQ 30/0 min	Ovarian cancer average log2 iTRAQ 60/0 min	Ovarian cancer adjusted p-value (moderated F test)	Ovarian cancer adjusted p-value (kinetic modeling)	Ovarian cancer regulated (moT pval<0.01 OR kinetic modeling pval<0.01)?	Ovarian cancer halftime (derived from kinetic model)	Number of quantified basal-like breast cancer time point ratios	Basal breast tumor replicate 1 WHIM6 log2_iTRAQ_115_114_median (5min/0min) normalized	Basal breast tumor replicate 1 WHIM6 log2_iTRAQ_116_114_median (30min/0min) normalized	Basal breast tumor replicate 1 WHIM6 log2_iTRAQ_117_114_median (60min/0min) normalized	Basal breast tumor replicate 2 WHIM6 log2_iTRAQ_116_117_median (5min/0min) normalized	Basal breast tumor replicate 2 WHIM6 log2_iTRAQ_114_117_median (30min/0min) normalized	Basal breast tumor replicate 2 WHIM6 log2_iTRAQ_115_117_median (60min/0min) normalized	Basal breast tumor replicate 3 WHIM6 log2_iTRAQ_117_116_median (5min/0min) normalized	Basal breast tumor replicate 3 WHIM6 log2_iTRAQ_115_116_median (30min/0min) normalized	Basal breast tumor replicate 3 WHIM6 log2_iTRAQ_114_116_median (60min/0min) normalized
20357552_S150s _1_1_150_150	20357552	296080746|20357552|20357556|75677414	src substrate cortactin isoform a	Homo sapiens|Mus musculus	NO	495.989	1900.99	79.9465	S150s	148	(K)	HAsQKDYSSGFGGK	(Y)	HAS(0.99)QKDY(0.0)S(0.0)S(0.0)GFGGK	17.71	http://proteomics.broadinstitute.org/millscripts/viewfeed.pl?side=xl&cycle=1&fixedMods=iaaC+iTRAQ_116&file=msdataSM/MertinsMCP2014/luminalSTY3/cpick_in/H20120802_PM_WHIM20_4TP_Exp3_pSTY_07.7157.7157.3.pkl&seq=HAsQKDYSSGFGGK	TRUE	TRUE	21	6	NA	NA	NA	NA	NA	NA	-0.446	-0.1325	-0.883	0.049	0.923	1.746	NA	NA	NA	NA	NA	NA	NA	6	0.821	0.997	1.212	NA	NA	NA	0.612	0.653	0.551
20357552_S113s _1_1_113_113	20357552	296080746|20357552|20357556|75677414	src substrate cortactin isoform a	Homo sapiens|Mus musculus	NO	595.298	1703.91	79.9683	S113s	108	(K)	LSKHCsQVDSVR	(G)	LS(0.0)KHCS(0.99)QVDS(0.0)VR	11.29	http://proteomics.broadinstitute.org/millscripts/viewfeed.pl?side=xl&cycle=1&fixedMods=iaaC+iTRAQ_116&file=msdataSM/MertinsMCP2014/basalSTY1/cpick_in/H20120523_JQ_CPTAC2_4TP_Exp1_IMAC_03.6944.6944.3.pkl&seq=LSKHCsQVDSVR	FALSE	TRUE	18	0	NA	NA	NA	NA	NA	NA	NA	NA	NA	NA	NA	NA	NA	NA	NA	NA	NA	NA	NA	9	-0.235	-0.286	-0.515	-0.141	-0.266	-0.269	-0.952	-1.003	-0.803
20357552_S282s _1_1_282_282	20357552	20357552	src substrate cortactin isoform a	Homo sapiens	NO	657.325	1890	79.9644	S282s	280	(R)	QDsAAVGFDYKEK	(L)	QDS(0.99)AAVGFDY(0.0)KEK	18.77	http://proteomics.broadinstitute.org/millscripts/viewfeed.pl?side=xl&cycle=1&fixedMods=iaaC+iTRAQ_116&file=msdataSM/MertinsMCP2014/luminalSTY2/cpick_in/H20120802_PM_WHIM20_4TP_Exp2_pSTY_12.12656.12656.3.pkl&seq=QDsAAVGFDYKEK	TRUE	TRUE	12	0	NA	NA	NA	NA	NA	NA	NA	NA	NA	NA	NA	NA	NA	NA	NA	NA	NA	NA	NA	3	-1.13	-1.011	-1.332	NA	NA	NA	NA	NA	NA
Mertins P, et al. (2016) Proteogenomics connects somatic mutations to signalling in breast cancer. Nature 534, 55-62
accessionNumber_VMsites_numVMsitesPresent_numVMsitesLocalizedBest_earliestVMsiteAA_latestVMsiteAA	numITRAQExperimentsVMsiteObserved	numSpectraVMsiteObserved	bestFilename	bestScore	bestDeltaForwardReverseScore	Best_scoreVML	Best_numPossibleVMsites_STY	Best_numActualVMSites_sty	Best_numLocalizedVMsites_sty	Best_numAmbiguousVMsites_sty	best_matched_parent_mass	best_delta_parent_mass	variableSites	nterm	StartAA	previous_aa	sequence	next_aa	sequenceVML	protein_mw	species	accession_numbers	protein_group_num	protein_score	accession_number	geneName	Description	AO-A12D.01TCGA	C8-A131.01TCGA	AO-A12B.01TCGA	E2-A10A.02TCGA	BH-A18Q.02TCGA	C8-A130.02TCGA	C8-A138.03TCGA	E2-A154.03TCGA	BH-A0BZ.03TCGA	A8-A09I.04TCGA	C8-A12L.04TCGA	A2-A0EX.04TCGA	AO-A12D.05TCGA	AN-A04A.05TCGA	BH-A0AV.05TCGA	A2-A0D0.06TCGA	BH-A0HK.06TCGA	C8-A12T.06TCGA	A8-A06Z.07TCGA	A2-A0D1.07TCGA	A2-A0CM.07TCGA	BH-A18U.08TCGA
NP_005222_S113s _1_1_113_113	26	38	TCGA_E2-A10A_BH-A18Q_C8-A130_117C_P_BI_20130228_H-PM_f05.3219.3219.2	9.39	9.39	9.391	2	1	1	0	1231.6	79.9635	S113s	iTRAQ	111	(K)	HCsQVDSVR	(G)	HCS(0.99)QVDS(0.0)VR	61756.2	Human	NP_001171669|NP_005222|NP_612632	283.1	529.33	NP_005222	CTTN	NP_005222	0.574933	1.03878	0.00363538		-3.32722	-2.35109	0.80883	-2.71885	-10.3934		-0.438629	4.80385	1.28661	-0.900918	-1.57905		-8.8496	-1.09452	-1.94282	-7.03081	0.389931	-2.41297
NP_005222_S282s _1_1_282_282	32	85	TCGA_A7-A0CJ_AO-A12F_A2-A0YL_117C_P_BI_20130904_H-PM_f10.19169.19169.3	19.56	19.56	2.383	3	1	1	0	2292.15	79.9653	S282s	iTRAQ	273	(K)	FGVQSERQDsAAVGFDYK	(E)	FGVQS(0.0)ERQDS(0.99)AAVGFDY(0.0)K	61756.2	Human	NP_005222	283.1	529.33	NP_005222	CTTN	NP_005222	0.40845	-0.269475	1.23802	-0.016789	0.206707	-0.749068	-0.63584	1.40522	1.74662	-0.895014	-0.782639	2.29819	-2.03935	-0.50096	3.34919	0.533616	2.10818	0.643523	-1.03603	-1.96371	0.467642	0.782521
Bian Y, et al. (2014) An enzyme assisted RP-RPLC approach for in-depth analysis of human liver phosphoproteome. J Proteomics 96, 253-62
Site	Sequence window	Ascore	Novel or Known	Num_aa	Num_S	Num_T	Num_Y	Reference
S150	GKTEKHASQKDYSSG	50.32	Known	550	41	22	28	IPI:IPI00029601.6|SWISS-PROT:Q14247|TREMBL:Q53HG7;Q76MU0|ENSEMBL:ENSP00000301843|REFSEQ:NP_005222|H-INV:HIT000197014|VEGA:OTTHUMP00000165962 Tax_Id=9606 Gene_Symbol=CTTN Src substrate cortactin
Wiśniewski JR, et al. (2010) Brain phosphoproteome obtained by a FASP-based method reveals plasma membrane protein topology. J Proteome Res 9, 3280-9
Position	Known Site	Protein	Protein Names	Gene Names	Uniprot	Best Localization Probability	Score Diff	Identified in (localization probability)												Number of Phospho (STY)	Amino Acid	Motifs	Best Motif	Random Match	PEP	Mascot Score	PTM Score	Modified Sequence	Phospho (STY) Probabilities	Charge	m/z	Mass Error [ppm]	Intensity
								FACE experiment A	FACE experiment B	SAX experiment C	SAX experiment D	SAX experiment A	SAX experiment A second enrichment	SAX experiment B	SAX experiment B second enrichment	SEC1	SEC2	SEC3	SEC3 second enrichment
113	Phosphoserine	IPI00624988	Putative uncharacterized protein;Cortactin, isoform CRA_e;Src substrate cortactin;Putative uncharacterized protein	Cttn;mCG_21254;Cttn;Ems1;Cttn	Q3UGC2;Q60598;Q8BNA5;Q921L6	1	67.7668							1		0.999999	0.999617	1	0.999945	1	S	CHK1;CK1;GSK3;PKD	PKD	0.020748	0.0028118	23.5	117.35	_HCS(ph)QVDSVR_	HCS(1)QVDSVR	2	584.234	-0.11896	1185400
Chen L, Giorgianni F, Beranova-Giorgianni S (2010) Characterization of the phosphoproteome in LNCaP prostate cancer cells by in-gel isoelectric focusing and tandem mass spectrometry. J Proteome Res 9, 174-8
Q14247 SRC8_HUMAN Src substrate cortactin (Amplaxin) (Oncogene EMS1)
	Accession	2.12
	Scan(s)	109 NEW & 113 Swiss/ 113 phos
	Peptide	No & Yes
	MH+	R.LPSS*PVY*EDAASFK.A2
	z	1670.675002.47
	XC	418 Swiss/ 418 phos & 412 Swiss/ 412 phosYes & Yes
	( * means alternative phosphosite is possible )
	as of 06.17.08
Rinschen MM, et al. (2010) Quantitative phosphoproteomic analysis reveals vasopressin V2-receptor-dependent signaling pathways in renal collecting duct cells. Proc Natl Acad Sci U S A 107, 3882-7
RefSeq number	Gene symbol	Peptide sequence	Protein name	Phosphosite(s)		log2 ratio dDAVP/vehicle				Human homolog RefSeq	Human homolog phosphosite
NP_031829	Cttn	HAS*QKDYSSGFGGKYGVQADR	cortactin	S150	1	6.54				NP_612632	S150
Klammer M, et al. (2012) Phosphosignature predicts dasatinib response in non-small cell lung cancer. Mol Cell Proteomics 11, 651-68
id	Protein	Proteins	Position	Amino Acid	Sequence Window	Gene Names	Modified Sequence	Position in peptide	Localization Prob	Score Diff	Score	Ratio M/L Normalized Exp. 16	Ratio H/L Normalized Exp. 16	Ratio M/L Normalized Exp. 17	Ratio H/L Normalized Exp. 17	Ratio M/L Normalized Exp. 18	Ratio H/L Normalized Exp. 18
11538	Q14247	Q14247;Q53HG7;Q76MU0	282	S	QSERQDSAAVGFD	CTTN;EMS1;EMS1	_QDpSAAVGFDYK_	3	0.999117	30.5388	30.539
Olsen JV, et al. (2010) Quantitative phosphoproteomics reveals widespread full phosphorylation site occupancy during mitosis. Sci Signal 3, ra3
Protein ID (IPI v.3.37 number)	Uniprot ID (Swiss-Prot or TrEMBL)	Phosphosite position in protein	Known Site in Expasy (Swiss-Prot or TrEMBL)	Phosphosite Localized?	Ratio M/L Normalized by Protein Noco45 - Log2 mitosis	Ratio M/L Normalized by Protein Noco3h - Log2 G1	Ratio M/L Normalized by Protein ThymON - Log2 G1/S	Ratio H/M Normalized by Protein Noco45 - Log2 early S	Ratio H/M Normalized by Protein Noco3h - Log2 Late S	Ratio H/M Normalized by Protein ThymON - Log2 G2	Protein Names	Gene Names	P-site Loc. Prob.	PTM Delta Score (Difference between highest scoring site and second highest)	Number of Phospho (STY)	Amino Acid	Sequence Window	Kinase Motif(s)	P+1 position	Best Mascot Score	PTM Score	pAA	Peptide ratio count	Ratio Variability [%]	Modified Sequence	Raw Sequence	Phospho (STY) Probabilities	Phospho (STY) Score Diffs	Charge	m/z	Mass Error [ppm]	Log2 Ratio M/L Normalized aphidicolin	Log2 Ratio H/M Normalized aphidicolin	Stoichiometry Async Average [%]	Stoichiometry - mitosis [%]	Stoichiometry - G1 [%]	Stoichiometry G1/S [%]	Stoichiometry - Early S [%]	Stoichiometry - Late S [%]	Stoichiometry - G2 [%]	Stoichiometry - Aphidicolin S-phase [%]	Stoichiometry Mitosis Aphidicolin-Nocodazole arrest [%]	Best Localization Raw File	Best Localization Scan Number	Best Identification Raw File	Best Identification Scan Number	ENSEMBL ID	Pfam	Pfam Names
IPI00029601	Q14247;Q53HG7;Q76MU0	282		YES (Class1)	0	0	0	0	0	0	Src substrate cortactin;Amplaxin;Oncogene EMS1	CTTN;EMS1	1	33.0407	2	S	QSERQDSAAVGFD	CAMK2	SA	8.69	33.041	S282	1	n.a.	_(gl)QDS(ph)AAVGFDY(ph)K_	QDSAAVGFDYK	QDS(1)AAVGFDY(1)K	QDS(33.04)AAVGFDY(33.04)K	2	672.233	5.3372												20070227_JVO_LTQ-Orbitrap3_Noco3h-Async-Thym5h-NP-GeLCMS-TiO2_A08	3398	20070227_JVO_LTQ-Orbitrap3_Noco3h-Async-Thym5h-NP-GeLCMS-TiO2_A08	3398	ENSG00000085733	PF02218;PF00018	HS1_rep;SH3_1
[truncated: 89 more columns]
